# Supplementary material for: Convergent molecular evolution of phosphoenolpyruvate carboxylase gene family in C4 and crassulacean acid metabolism plants
Source: PeerJ. 2022 Jan 20;10:e12828. doi: 10.7717/peerj.12828 (PMC8784020; doi:10.7717/peerj.12828)
Supplement: Supplemental Information 3 [file peerj-10-12828-s003.xls]

## Sheet: Sheet1
ID	Original ID	Template	Seq Identity	GMQE	QMEAN	Coverage	Description
AaPEPC1	AANG012509	3zgb.1.A	0.7356	0.81	-1.09	0.97	PHOSPHOENOLPYRUVATE CARBOXYLASE
AcPEPC2	Aco010025	3zgb.1.A	0.83	0.92	-0.38	0.99	PHOSPHOENOLPYRUVATE CARBOXYLASE
AcPEPC1	Aco018093	3zgb.1.A	0.8708	0.95	-0.47	0.99	PHOSPHOENOLPYRUVATE CARBOXYLASE
AfPEPC1	Azfi_s0001.g000489	3zgb.1.A	0.7724	0.82	-0.69	0.95	PHOSPHOENOLPYRUVATE CARBOXYLASE
AfPEPC2	Azfi_s0091.g042910	3zgb.1.A	0.7713	0.85	-0.87	0.97	PHOSPHOENOLPYRUVATE CARBOXYLASE
AhPEPC2	AH008008	3zgb.1.A	0.876	0.91	-1.6	0.97	PHOSPHOENOLPYRUVATE CARBOXYLASE
AhPEPC1.1	AH000245	3zgb.1.A	0.8448	0.93	-0.59	0.99	PHOSPHOENOLPYRUVATE CARBOXYLASE
AhPEPC1.2	AH001411	3zgb.1.A	0.8077	0.89	-0.83	0.99	PHOSPHOENOLPYRUVATE CARBOXYLASE
AtPEPC3.1	AT3G14940.1	5fdn.1.A	1	0.97	-0.77	1	Phosphoenolpyruvate carboxylase 3
AtPEPC3.2	AT3G14940.2	5fdn.1.A	1	0.97	-0.77	1	Phosphoenolpyruvate carboxylase 3
AtPEPC1.2	AT1G53310.2	3zgb.1.A	0.8792	0.95	-0.76	0.99	PHOSPHOENOLPYRUVATE CARBOXYLASE
AtPEPC1.1	AT1G53310.1	3zgb.1.A	0.8792	0.95	-0.76	0.99	PHOSPHOENOLPYRUVATE CARBOXYLASE
AtPEPC1.3	AT1G53310.3	3zgb.1.A	0.8792	0.95	-0.76	0.99	PHOSPHOENOLPYRUVATE CARBOXYLASE
AtPEPC2.2	AT2G42600.2	3zgb.1.A	0.8579	0.94	-0.51	0.99	PHOSPHOENOLPYRUVATE CARBOXYLASE
AtPEPC2.1	AT2G42600.1	3zgb.1.A	0.8579	0.94	-0.51	0.99	PHOSPHOENOLPYRUVATE CARBOXYLASE
AtPEPC2.3	AT2G42600.3	3zgb.1.A	0.8579	0.94	-0.51	0.99	PHOSPHOENOLPYRUVATE CARBOXYLASE
AmtPEPC1	ERN13889	3zgb.1.A	0.8781	0.95	-0.81	0.99	PHOSPHOENOLPYRUVATE CARBOXYLASE
GmPEPC1	TnS000982989t04	3zgb.1.A	0.8309	0.92	-0.45	0.99	PHOSPHOENOLPYRUVATE CARBOXYLASE
IsPEPC1.1	evm.model.CTG_19.36	3zgb.1.A	0.7596	0.86	-0.5	0.99	PHOSPHOENOLPYRUVATE CARBOXYLASE
IsPEPC1.2	evm.model.CTG_1657.43	3zgb.1.A	0.7596	0.86	-0.5	0.99	PHOSPHOENOLPYRUVATE CARBOXYLASE
KfPEPC1.2	Kaladp0048s0578.1	3zgb.1.A	0.8728	0.95	-0.8	1	PHOSPHOENOLPYRUVATE CARBOXYLASE
KfPEPC1.1	Kaladp0011s0355.1	3zgb.1.A	0.8707	0.95	-0.65	1	PHOSPHOENOLPYRUVATE CARBOXYLASE
KfPEPC2	Kaladp0011s0355.2	5vyj.1.A	0.7802	0.91	-1.2	1	Phosphoenolpyruvate carboxylase
KfPEPC3.1	Kaladp0011s1355.1	3zgb.1.A	0.8783	0.94	-0.69	0.99	PHOSPHOENOLPYRUVATE CARBOXYLASE
KfPEPC3.4	Kaladp0011s1355.4	3zgb.1.A	0.8783	0.94	-0.69	0.99	PHOSPHOENOLPYRUVATE CARBOXYLASE
KfPEPC3.2	Kaladp0011s1355.2	3zgb.1.A	0.8783	0.94	-0.69	0.99	PHOSPHOENOLPYRUVATE CARBOXYLASE
KfPEPC3.3	Kaladp0011s1355.3	3zgb.1.A	0.8783	0.94	-0.69	0.99	PHOSPHOENOLPYRUVATE CARBOXYLASE
KfPEPC3.5	Kaladp0095s0055.1	3zgb.1.A	0.804	0.9	-0.5	0.99	PHOSPHOENOLPYRUVATE CARBOXYLASE
MpPEPC1	PTQ45560	3zgb.1.A	0.7818	0.87	-0.7	0.98	PHOSPHOENOLPYRUVATE CARBOXYLASE
OsPEPC2.1	Os08t0366000-02	3zgb.1.A	0.8604	0.94	-0.59	1	PHOSPHOENOLPYRUVATE CARBOXYLASE
OsPEPC2.3	Os08t0366000-01	3zgb.1.A	0.8604	0.94	-0.59	1	PHOSPHOENOLPYRUVATE CARBOXYLASE
OsPEPC2.2	Os08t0366000-03	5vyj.1.A	0.7841	0.91	-1	1	Phosphoenolpyruvate carboxylase
OsPEPC3	Os09t0315700-01	3zgb.1.A	0.849	0.92	-0.29	0.98	PHOSPHOENOLPYRUVATE CARBOXYLASE
OsPEPC1.1	Os01t0758300-01	3zgb.1.A	0.8517	0.93	-0.77	0.99	PHOSPHOENOLPYRUVATE CARBOXYLASE
OsPEPC1.2	Os01t0758300-02	5vyj.1.A	0.7963	0.93	-0.82	1	Phosphoenolpyruvate carboxylase
OsPEPC5	Os01t0208700-01	3zgb.1.A	0.7602	0.8	-0.98	0.94	PHOSPHOENOLPYRUVATE CARBOXYLASE
OsPEPC4.1	Os02t0244700-01	3zgb.1.A	0.8352	0.92	-0.71	0.99	PHOSPHOENOLPYRUVATE CARBOXYLASE
OsPEPC4.2	Os02t0244700-02	3zgb.1.A	0.8352	0.92	-0.71	0.99	PHOSPHOENOLPYRUVATE CARBOXYLASE
PbPEPC1	RS47c20811_g2_i2	5vyj.1.A	0.7337	0.89	-1.47	1	Phosphoenolpyruvate carboxylase
PbPEPC2	RS47c22800_g1_i2	3zgb.1.A	0.7377	0.83	-0.52	0.98	PHOSPHOENOLPYRUVATE CARBOXYLASE
PpPEPC2.1	Pp3c5_14630V3.2	3zgb.1.A	0.7296	0.85	-0.53	1	PHOSPHOENOLPYRUVATE CARBOXYLASE
PpPEPC2.2	Pp3c5_14630V3.1	3zgb.1.A	0.7296	0.85	-0.53	1	PHOSPHOENOLPYRUVATE CARBOXYLASE
PpPEPC6.1	Pp3c1_19290V3.1	3zgb.1.A	0.7253	0.84	-0.93	1	PHOSPHOENOLPYRUVATE CARBOXYLASE
PpPEPC6.2	Pp3c1_19290V3.2	3zgb.1.A	0.7253	0.84	-0.93	1	PHOSPHOENOLPYRUVATE CARBOXYLASE
PpPEPC3.1	Pp3c16_6580V3.3	3zgb.1.A	0.7631	0.87	-0.71	0.99	PHOSPHOENOLPYRUVATE CARBOXYLASE
PpPEPC3.5	Pp3c16_6580V3.5	3zgb.1.A	0.7735	0.83	-0.38	0.94	PHOSPHOENOLPYRUVATE CARBOXYLASE
PpPEPC3.4	Pp3c16_6580V3.1	3zgb.1.A	0.7631	0.87	-0.71	0.99	PHOSPHOENOLPYRUVATE CARBOXYLASE
PpPEPC3.3	Pp3c16_6580V3.2	3zgb.1.A	0.7631	0.87	-0.71	0.99	PHOSPHOENOLPYRUVATE CARBOXYLASE
PpPEPC3.2	Pp3c16_6580V3.4	3zgb.1.A	0.7631	0.87	-0.71	0.99	PHOSPHOENOLPYRUVATE CARBOXYLASE
PpPEPC4.1	Pp3c15_4920V3.6	3zgb.1.A	0.7513	0.86	-0.71	0.99	PHOSPHOENOLPYRUVATE CARBOXYLASE
PpPEPC4.7	Pp3c15_4920V3.2	3zgb.1.A	0.7513	0.86	-0.71	0.99	PHOSPHOENOLPYRUVATE CARBOXYLASE
PpPEPC4.6	Pp3c15_4920V3.1	3zgb.1.A	0.7513	0.86	-0.71	0.99	PHOSPHOENOLPYRUVATE CARBOXYLASE
PpPEPC4.5	Pp3c15_4920V3.4	3zgb.1.A	0.7513	0.86	-0.71	0.99	PHOSPHOENOLPYRUVATE CARBOXYLASE
PpPEPC4.4	Pp3c15_4920V3.3	3zgb.1.A	0.7513	0.86	-0.71	0.99	PHOSPHOENOLPYRUVATE CARBOXYLASE
PpPEPC4.2	Pp3c15_4920V3.5	3zgb.1.A	0.7513	0.86	-0.71	0.99	PHOSPHOENOLPYRUVATE CARBOXYLASE
PpPEPC4.3	Pp3c15_4920V3.7	3zgb.1.A	0.7513	0.86	-0.71	0.99	PHOSPHOENOLPYRUVATE CARBOXYLASE
PpPEPC1.1	Pp3c6_12940V3.5	5vyj.1.A	0.7041	0.85	-1.11	0.99	Phosphoenolpyruvate carboxylase
PpPEPC1.3	Pp3c6_12940V3.3	3zgb.1.A	0.7254	0.84	-0.8	0.99	PHOSPHOENOLPYRUVATE CARBOXYLASE
PpPEPC1.2	Pp3c6_12940V3.1	3zgb.1.A	0.7254	0.84	-0.8	0.99	PHOSPHOENOLPYRUVATE CARBOXYLASE
PpPEPC1.4	Pp3c6_12940V3.2	5vyj.1.A	0.7244	0.89	-0.88	0.99	Phosphoenolpyruvate carboxylase
PpPEPC5.1	Pp3c9_11080V3.1	3zgb.1.A	0.7451	0.85	-0.62	0.99	PHOSPHOENOLPYRUVATE CARBOXYLASE
PpPEPC5.2	Pp3c9_11080V3.2	3zgb.1.A	0.7451	0.85	-0.62	0.99	PHOSPHOENOLPYRUVATE CARBOXYLASE
SemPEPC2.1	EFJ19066	5vyj.1.A	0.6763	0.82	-1.14	1	Phosphoenolpyruvate carboxylase
SemPEPC1.1	EFJ06433	3zgb.1.A	0.7532	0.87	-0.73	1	PHOSPHOENOLPYRUVATE CARBOXYLASE
SemPEPC2.2	EFJ13502	5vyj.1.A	0.6741	0.83	-1.14	1	Phosphoenolpyruvate carboxylase
SemPEPC1.2	EFJ08755	3zgb.1.A	0.7529	0.86	-0.8	0.99	PHOSPHOENOLPYRUVATE CARBOXYLASE
SpmPEPC1.1	SM000074S21677	5vyj.1.A	0.6594	0.78	-1.03	0.91	Phosphoenolpyruvate carboxylase
SpmPEPC1.2	SM000093S24445	5vyj.1.A	0.6518	0.78	-0.95	0.91	Phosphoenolpyruvate carboxylase
SpmPEPC1.3	SM000254S08800	3zgb.1.A	0.66	0.77	-0.55	0.94	PHOSPHOENOLPYRUVATE CARBOXYLASE
ZmPEPC3.6	Zm00001d053453_P013	5vyj.1.A	0.8241	0.94	-0.7	1	Phosphoenolpyruvate carboxylase
ZmPEPC3.8	Zm00001d053453_P001	5vyj.1.A	0.8241	0.94	-0.7	1	Phosphoenolpyruvate carboxylase
ZmPEPC3.1	Zm00001d053453_P010	5vyj.1.A	0.8162	0.96	-0.54	1	Phosphoenolpyruvate carboxylase
ZmPEPC3.9	Zm00001d053453_P002	3zgb.1.A	0.8389	0.93	-0.82	1	PHOSPHOENOLPYRUVATE CARBOXYLASE
ZmPEPC3.3	Zm00001d053453_P005	5vyj.1.A	0.8184	0.96	-0.65	1	Phosphoenolpyruvate carboxylase
ZmPEPC3.7	Zm00001d053453_P016	5vyj.1.A	0.8241	0.94	-0.7	1	Phosphoenolpyruvate carboxylase
ZmPEPC3.5	Zm00001d053453_P015	5vyj.1.A	0.8162	0.96	-0.54	1	Phosphoenolpyruvate carboxylase
ZmPEPC3.4	Zm00001d053453_P012	5vyj.1.A	0.8184	0.96	-0.71	1	Phosphoenolpyruvate carboxylase
ZmPEPC3.2	Zm00001d053453_P009	5vyj.1.A	0.8162	0.96	-0.54	1	Phosphoenolpyruvate carboxylase
ZmPEPC5	Zm00001d046170_P001	5vyj.1.A	0.9979	0.97	-0.45	1	Phosphoenolpyruvate carboxylase
ZmPEPC2.1	Zm00001d020057_P003	3zgb.1.A	0.8635	0.94	-0.57	0.99	PHOSPHOENOLPYRUVATE CARBOXYLASE
ZmPEPC2.2	Zm00001d020057_P004	3zgb.1.A	0.8635	0.93	-0.84	0.98	PHOSPHOENOLPYRUVATE CARBOXYLASE
ZmPEPC1.5	Zm00001d012702_P009	3zgb.1.A	0.8342	0.91	-0.85	0.99	PHOSPHOENOLPYRUVATE CARBOXYLASE
ZmPEPC1.7	Zm00001d012702_P002	3zgb.1.A	0.8342	0.91	-0.85	0.99	PHOSPHOENOLPYRUVATE CARBOXYLASE
ZmPEPC1.1	Zm00001d012702_P008	3zgb.1.A	0.8458	0.93	-0.57	0.99	PHOSPHOENOLPYRUVATE CARBOXYLASE
ZmPEPC1.4	Zm00001d012702_P003	5vyj.1.A	0.7779	0.86	-0.9	0.99	Phosphoenolpyruvate carboxylase
ZmPEPC1.3	Zm00001d012702_P005	3zgb.1.A	0.8458	0.93	-0.57	0.99	PHOSPHOENOLPYRUVATE CARBOXYLASE
ZmPEPC1.2	Zm00001d012702_P010	5vyj.1.A	0.7865	0.91	-1.12	1	Phosphoenolpyruvate carboxylase
ZmPEPC1.6	Zm00001d012702_P006	3zgb.1.A	0.8342	0.91	-0.85	0.99	PHOSPHOENOLPYRUVATE CARBOXYLASE
ZmPEPC4.1	Zm00001d016166_P003	5vyj.1.A	0.8148	0.96	-0.9	1	Phosphoenolpyruvate carboxylase
ZmPEPC4.2	Zm00001d016166_P001	3zgb.1.A	0.8476	0.93	-0.49	1	PHOSPHOENOLPYRUVATE CARBOXYLASE
