# Supplementary figures and images for: Convergent molecular evolution of phosphoenolpyruvate carboxylase gene family in C4 and crassulacean acid metabolism plants
Source: PeerJ journal article supplement (doi:10.7717/peerj.12828), 2022-01-20

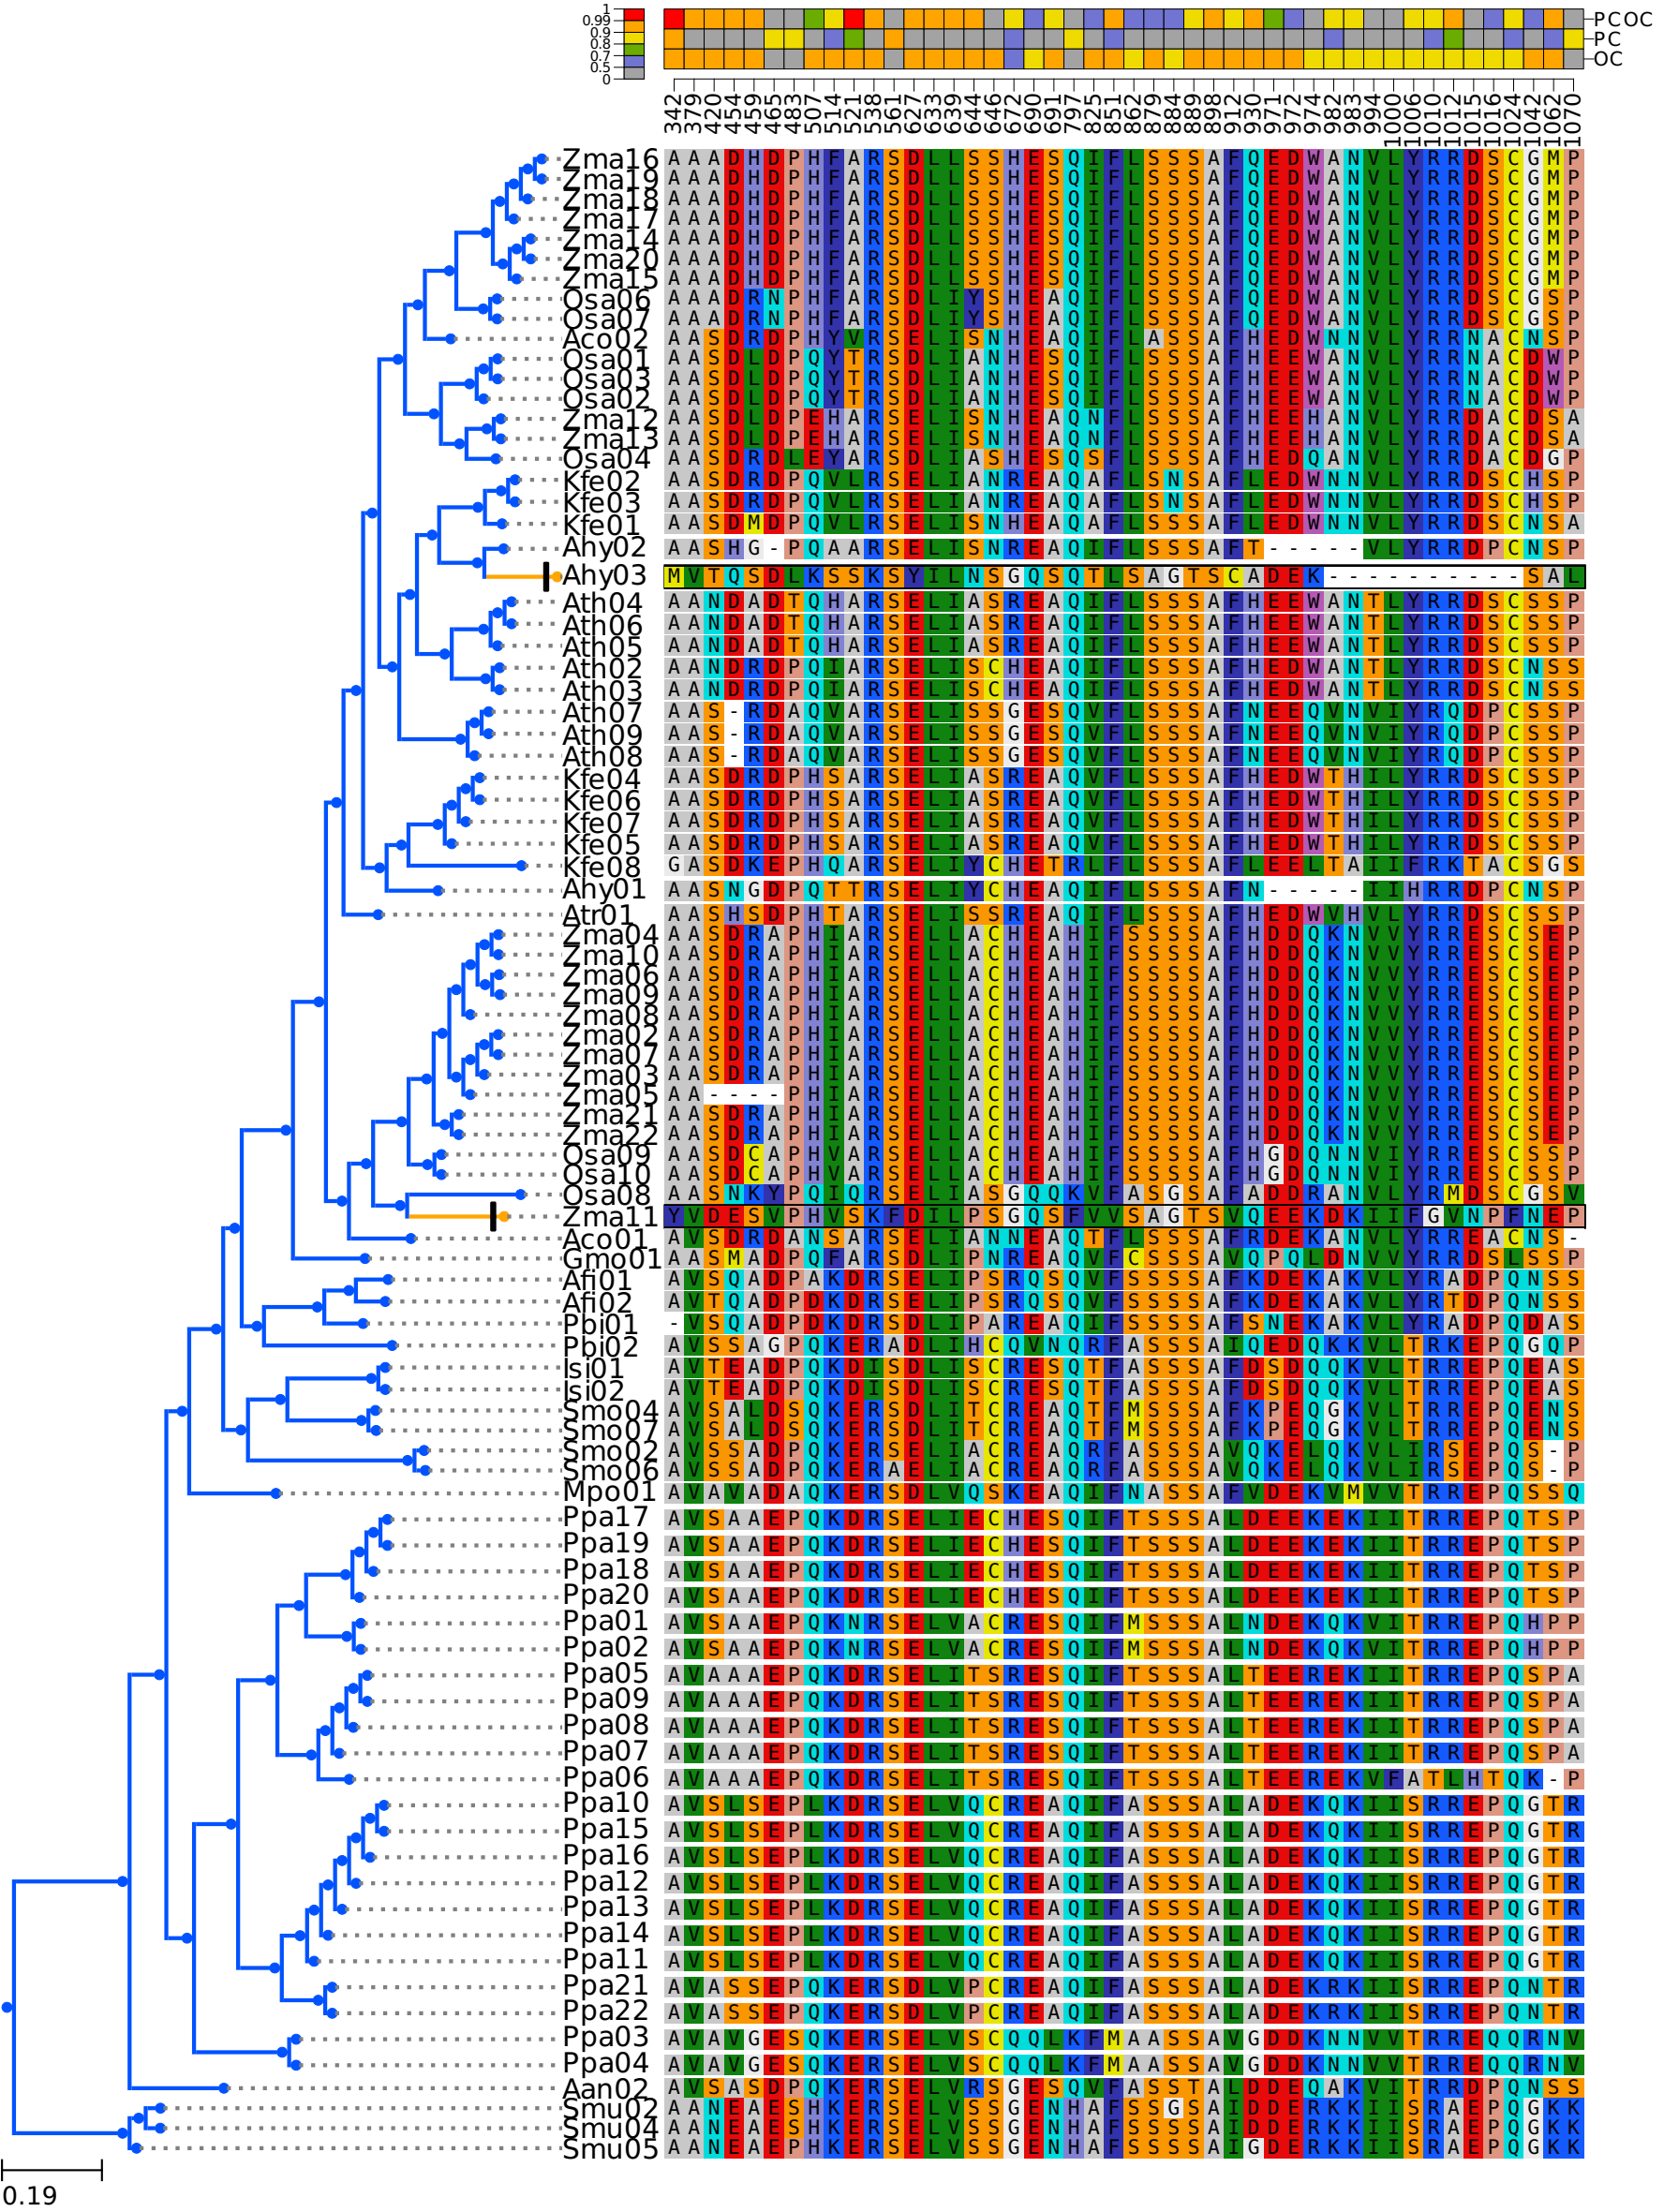

Supplement: Figure_S2.zip [file Figure_S2.zip]

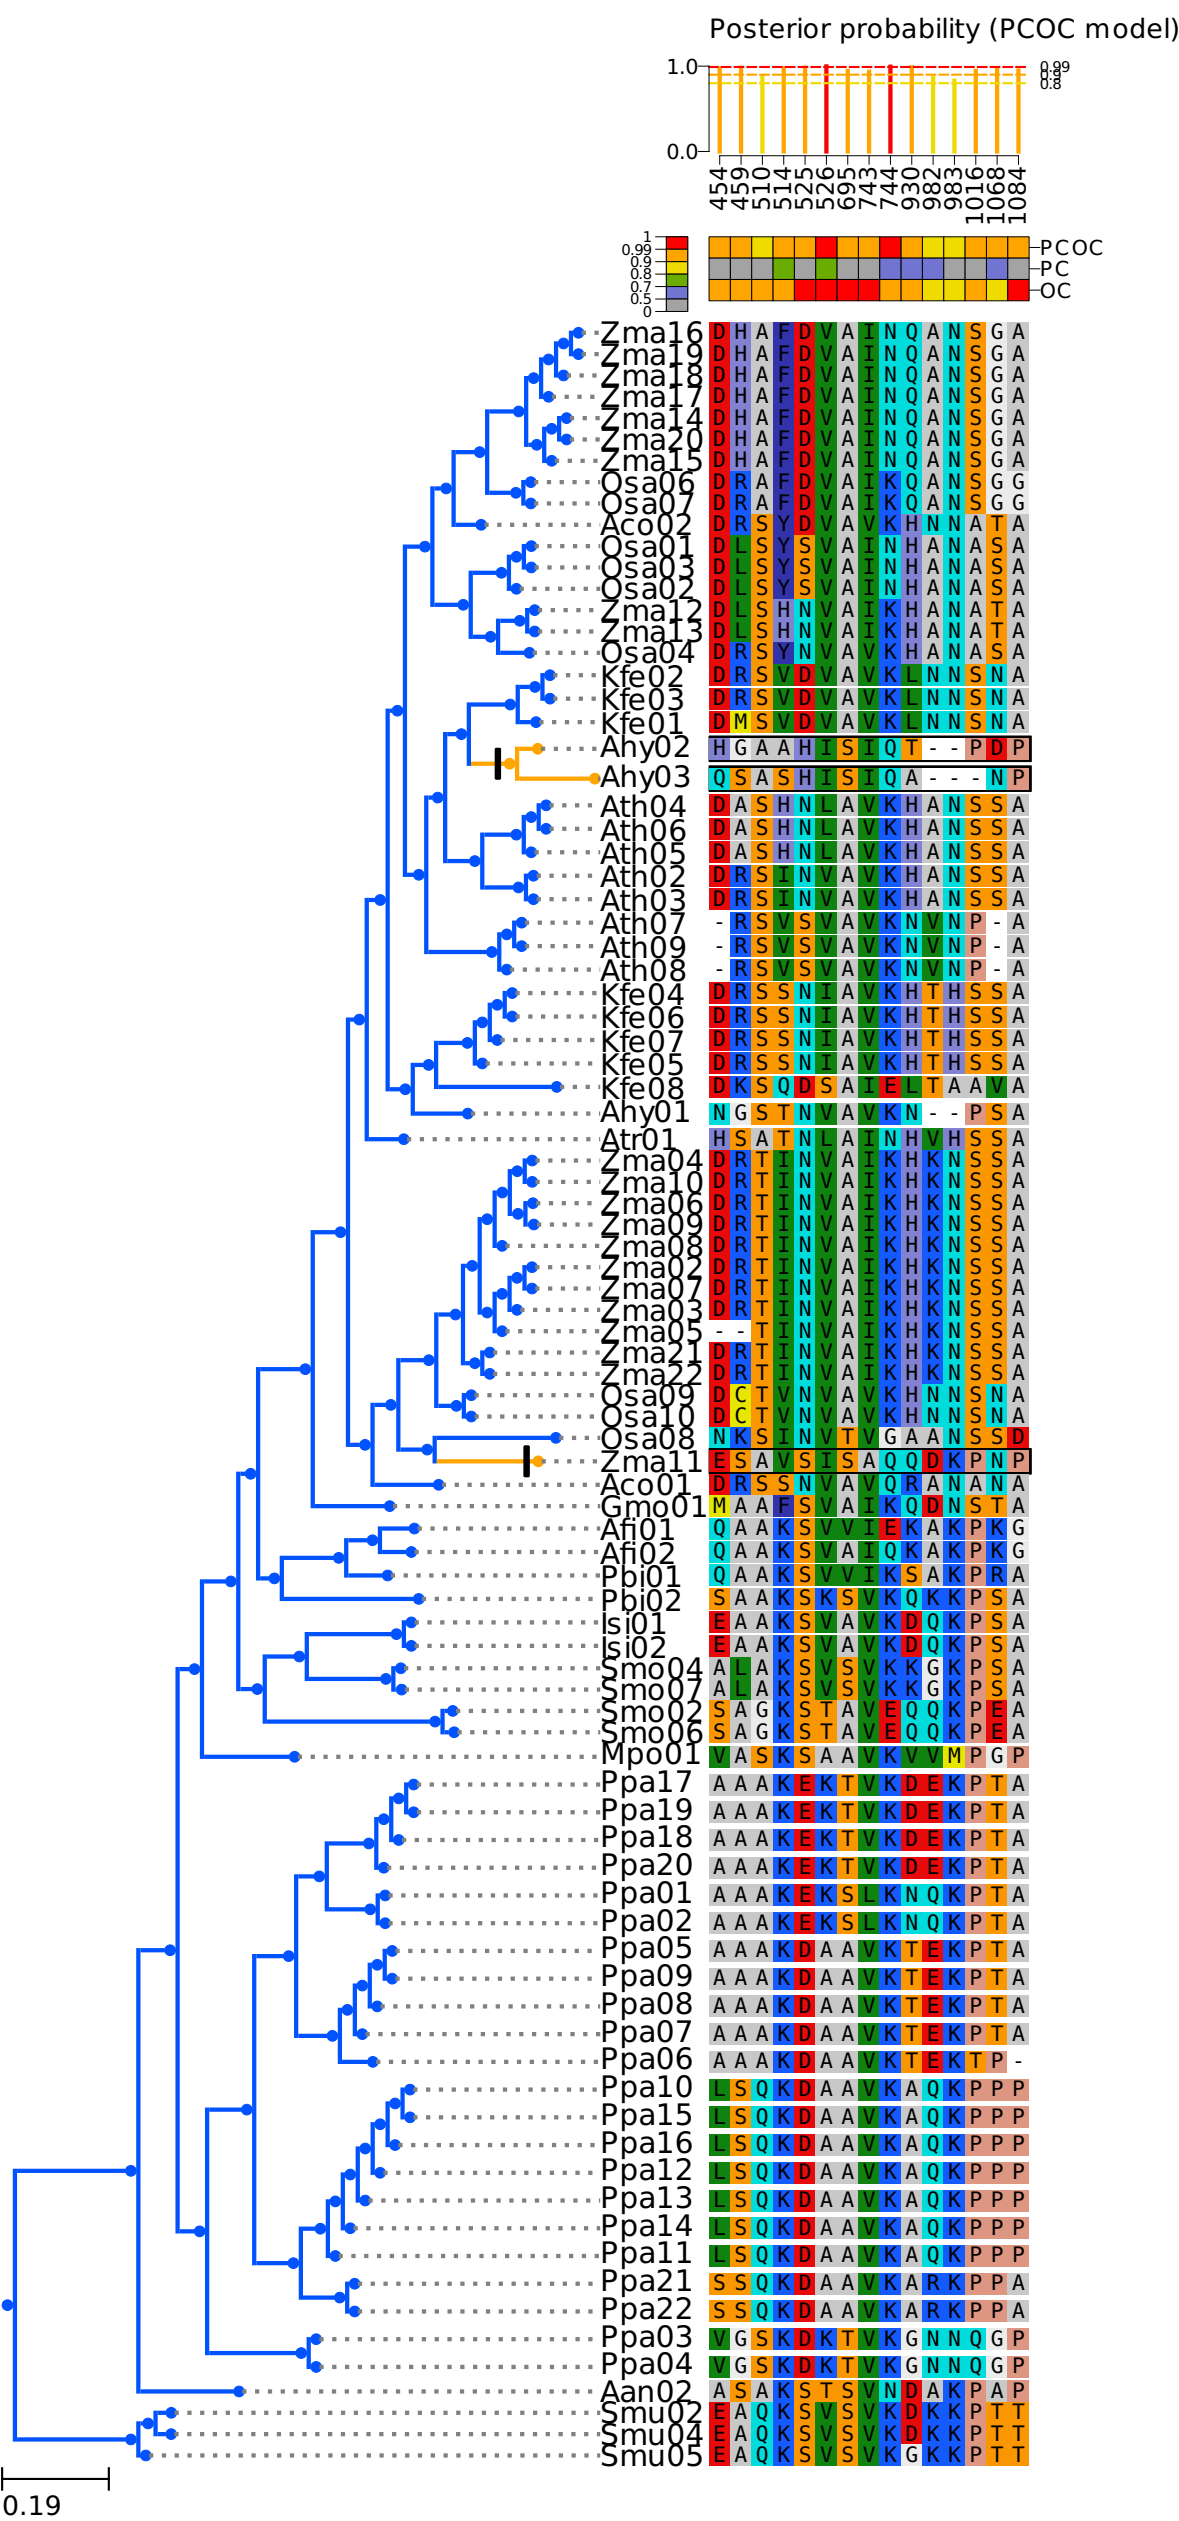

Supplement: Figure_S2.zip [file Figure_S2.zip]

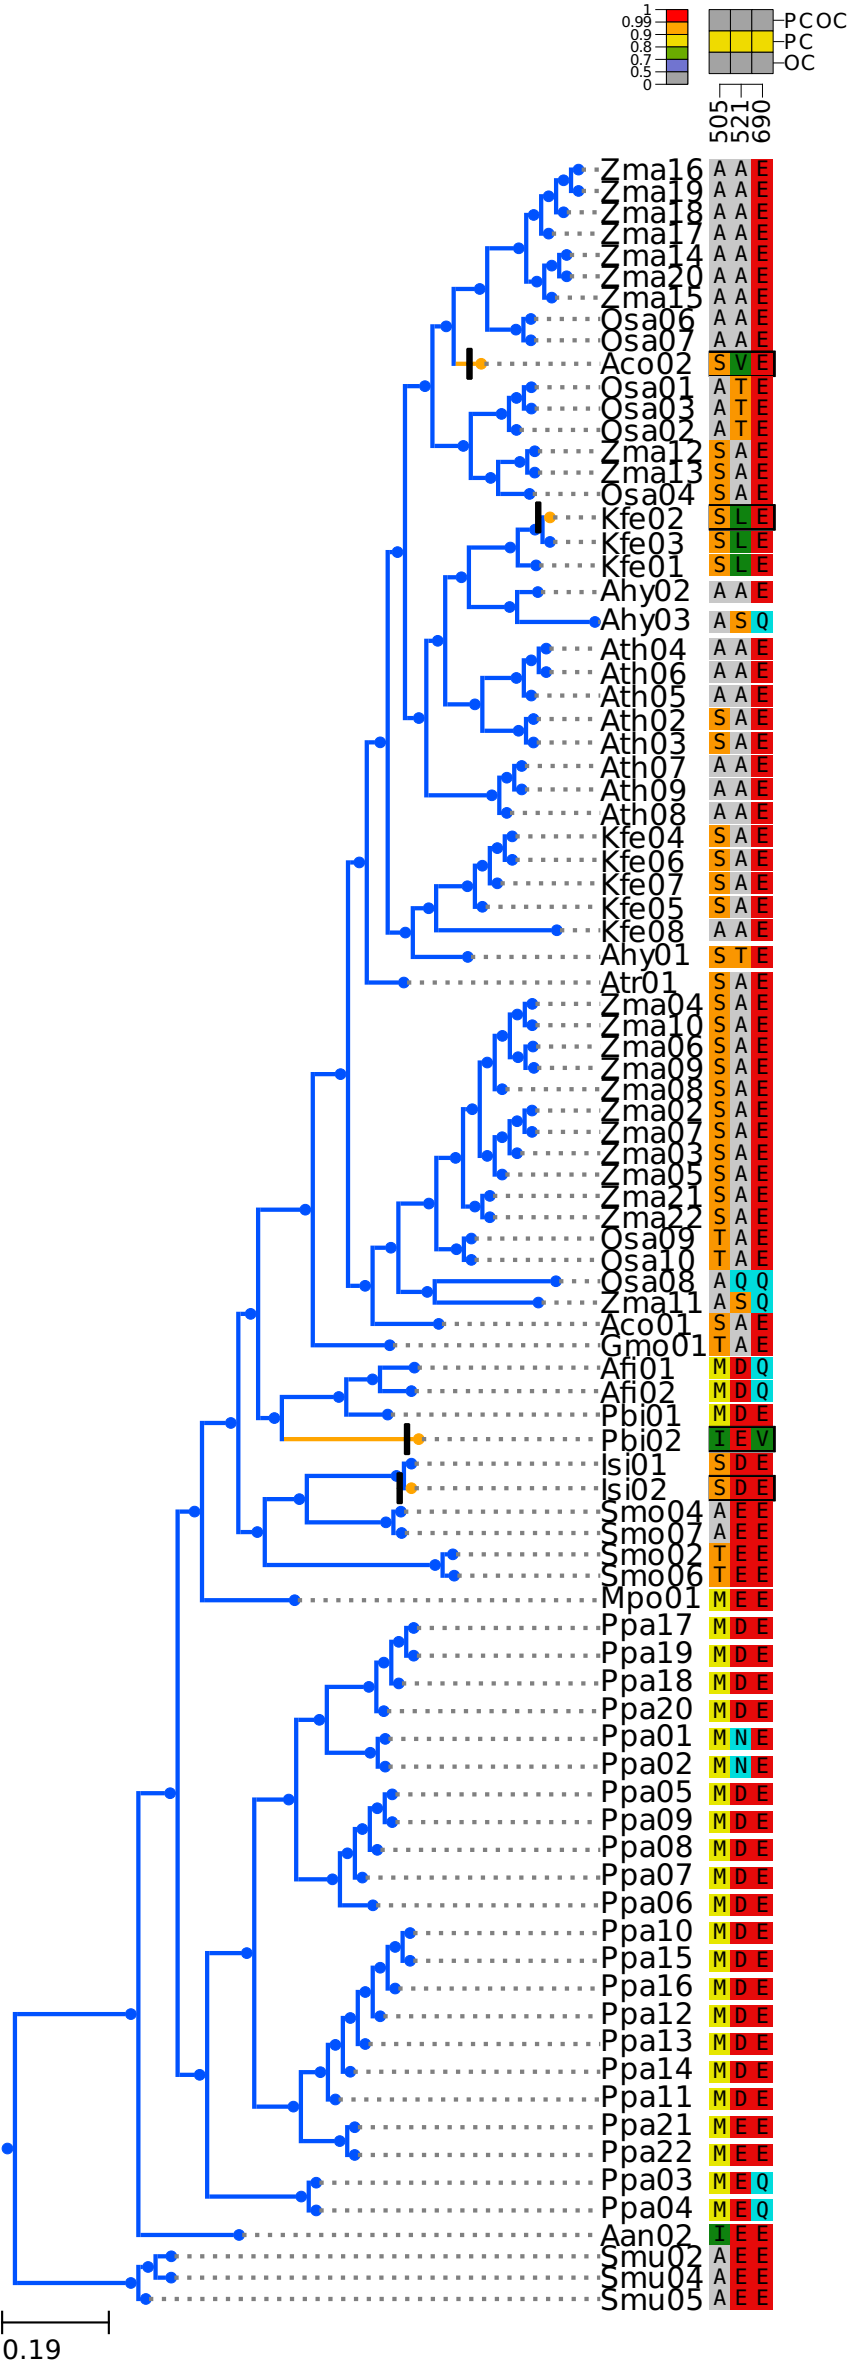

Supplement: Figure_S2.zip [file Figure_S2.zip]

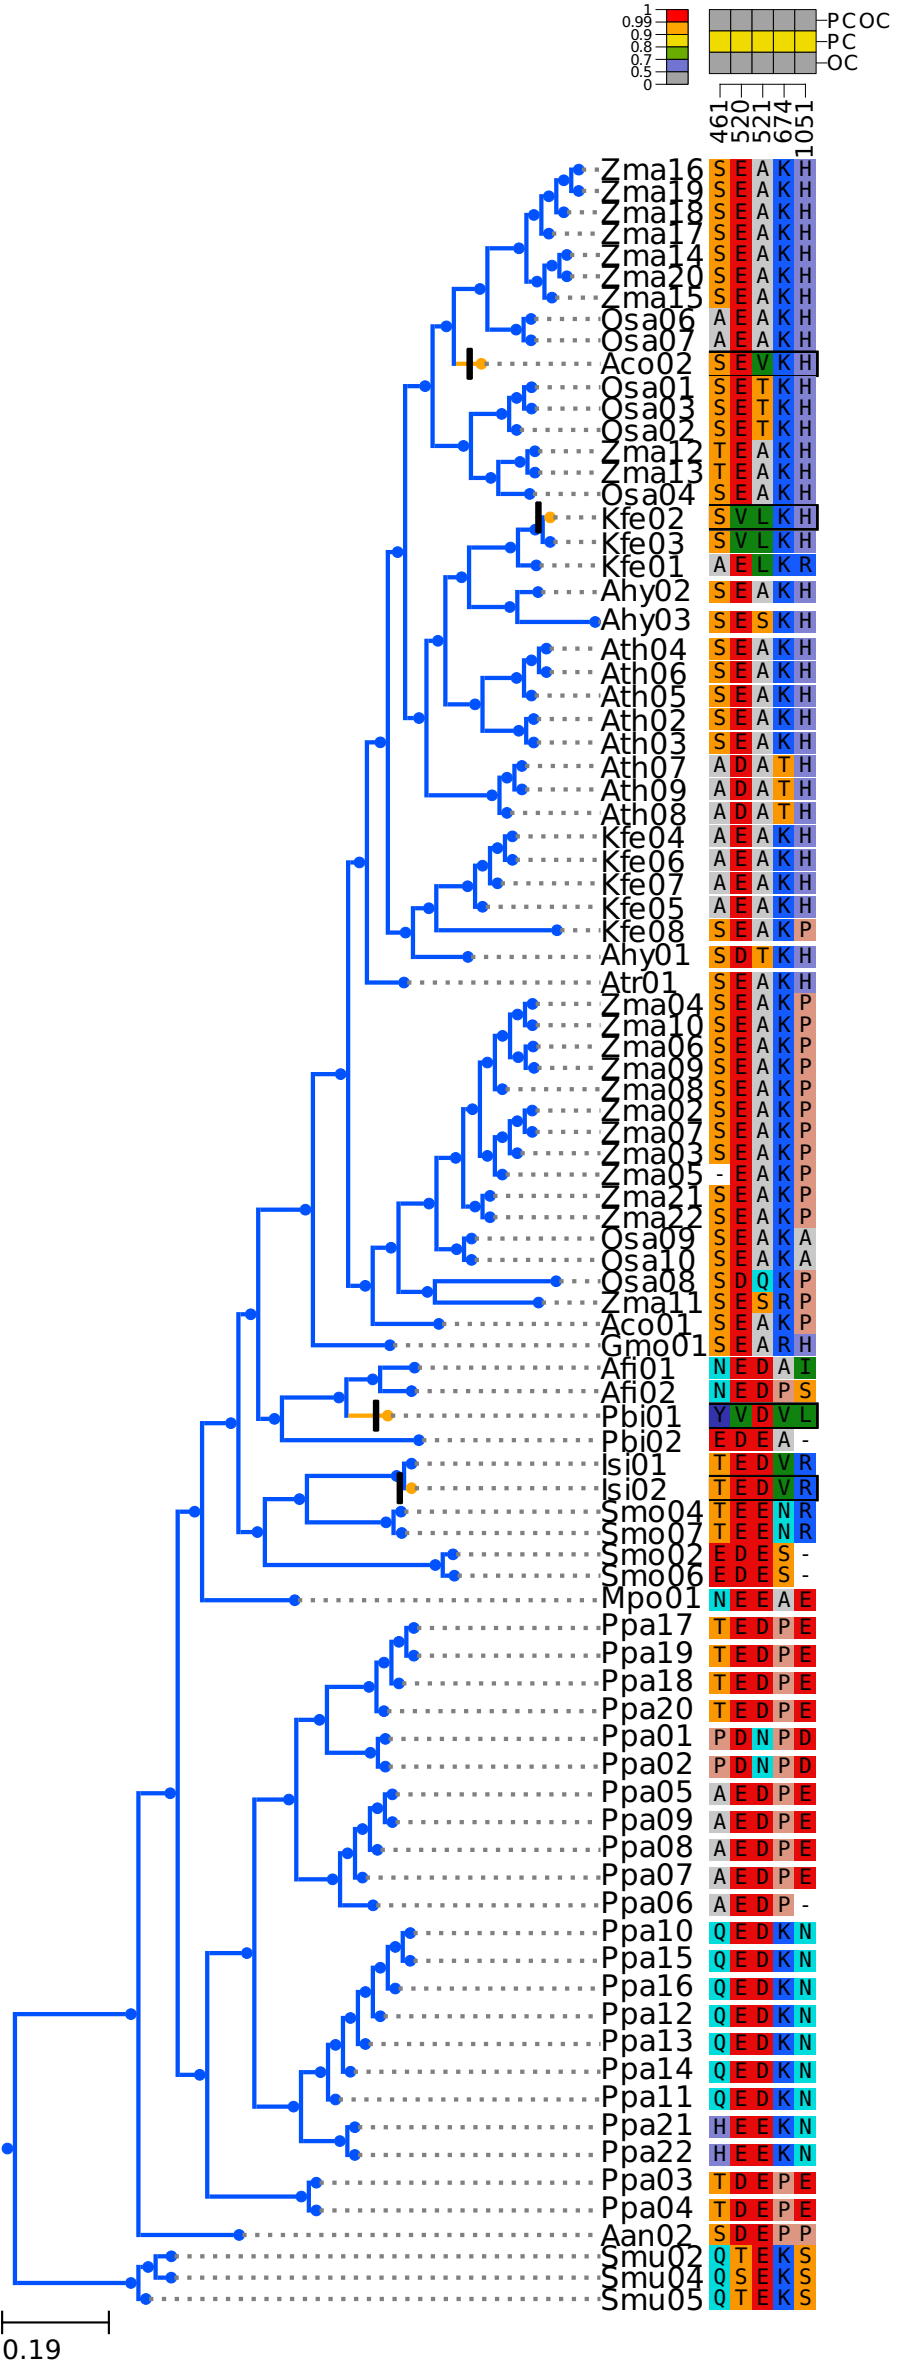

Supplement: Figure_S2.zip [file Figure_S2.zip]

Posterior probability (PCOC model)

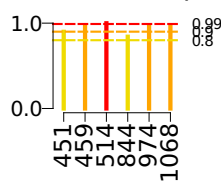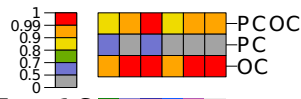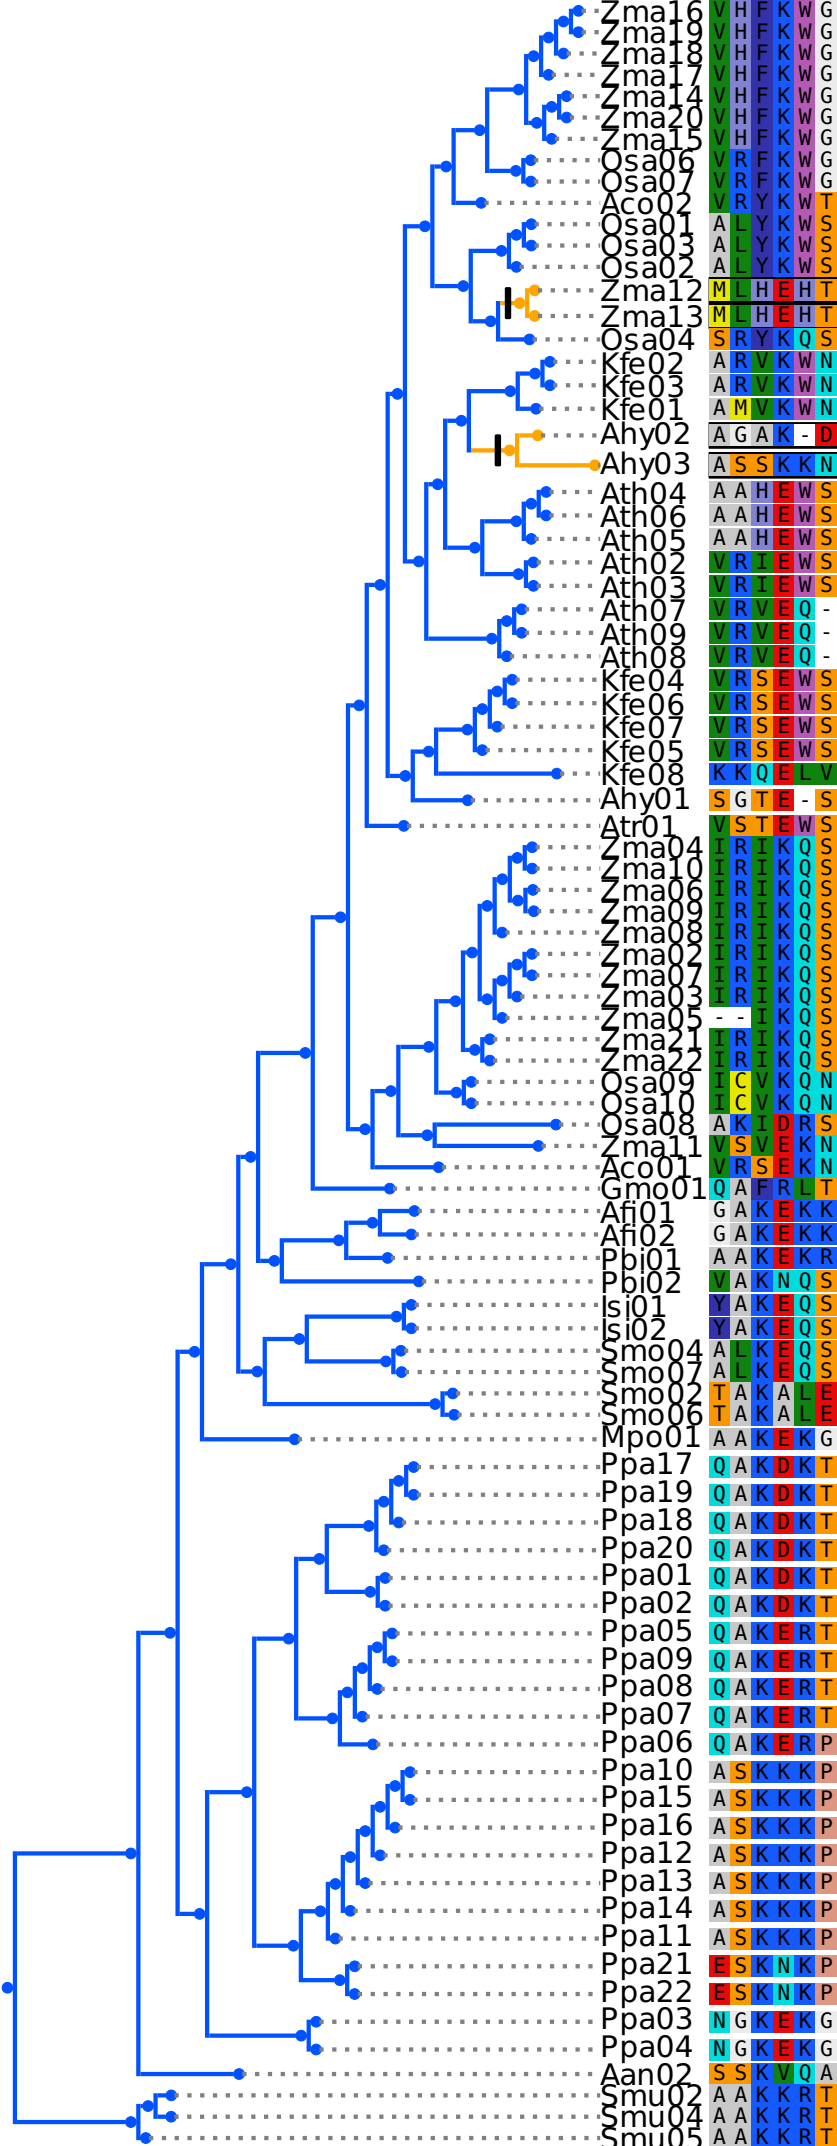

0.19

Supplement: Figure_S2.zip [file Figure_S2.zip]

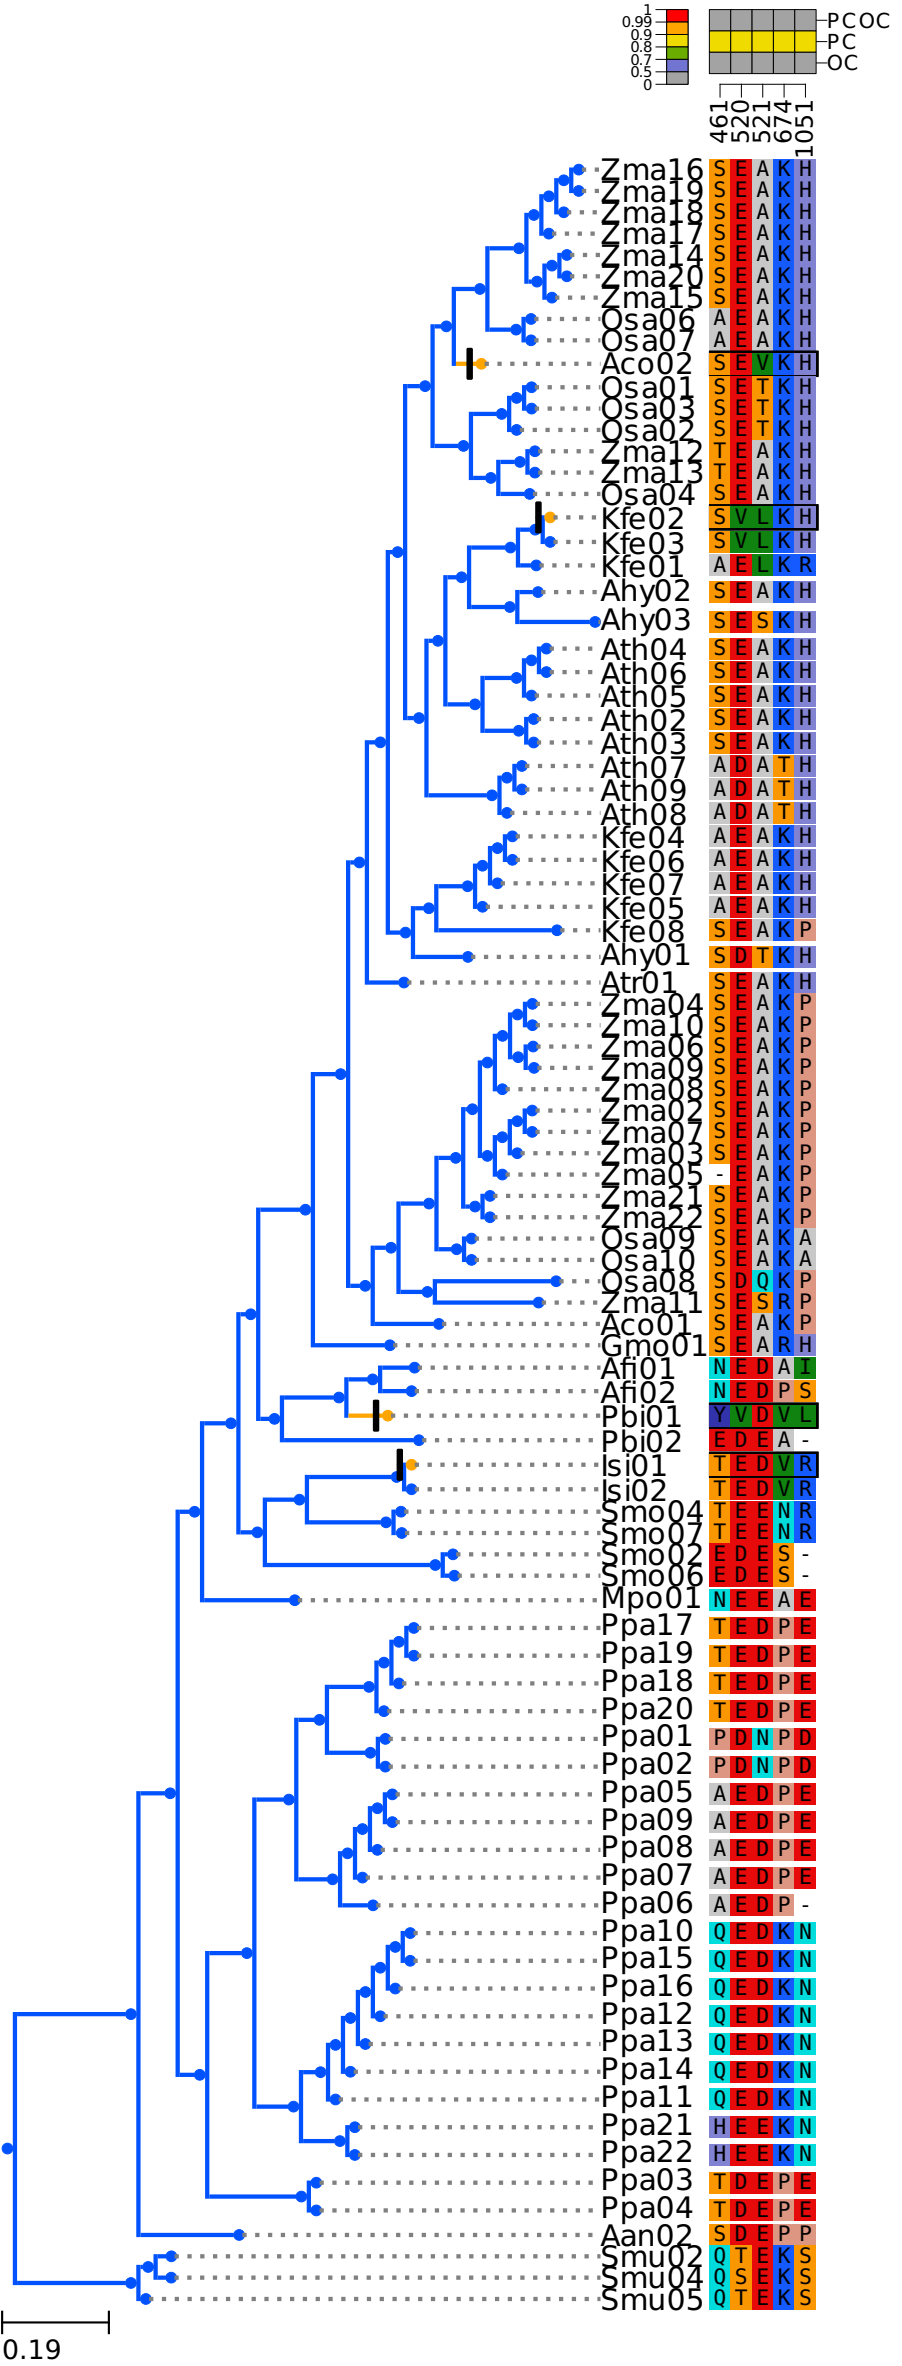

Supplement: Figure_S2.zip [file Figure_S2.zip]

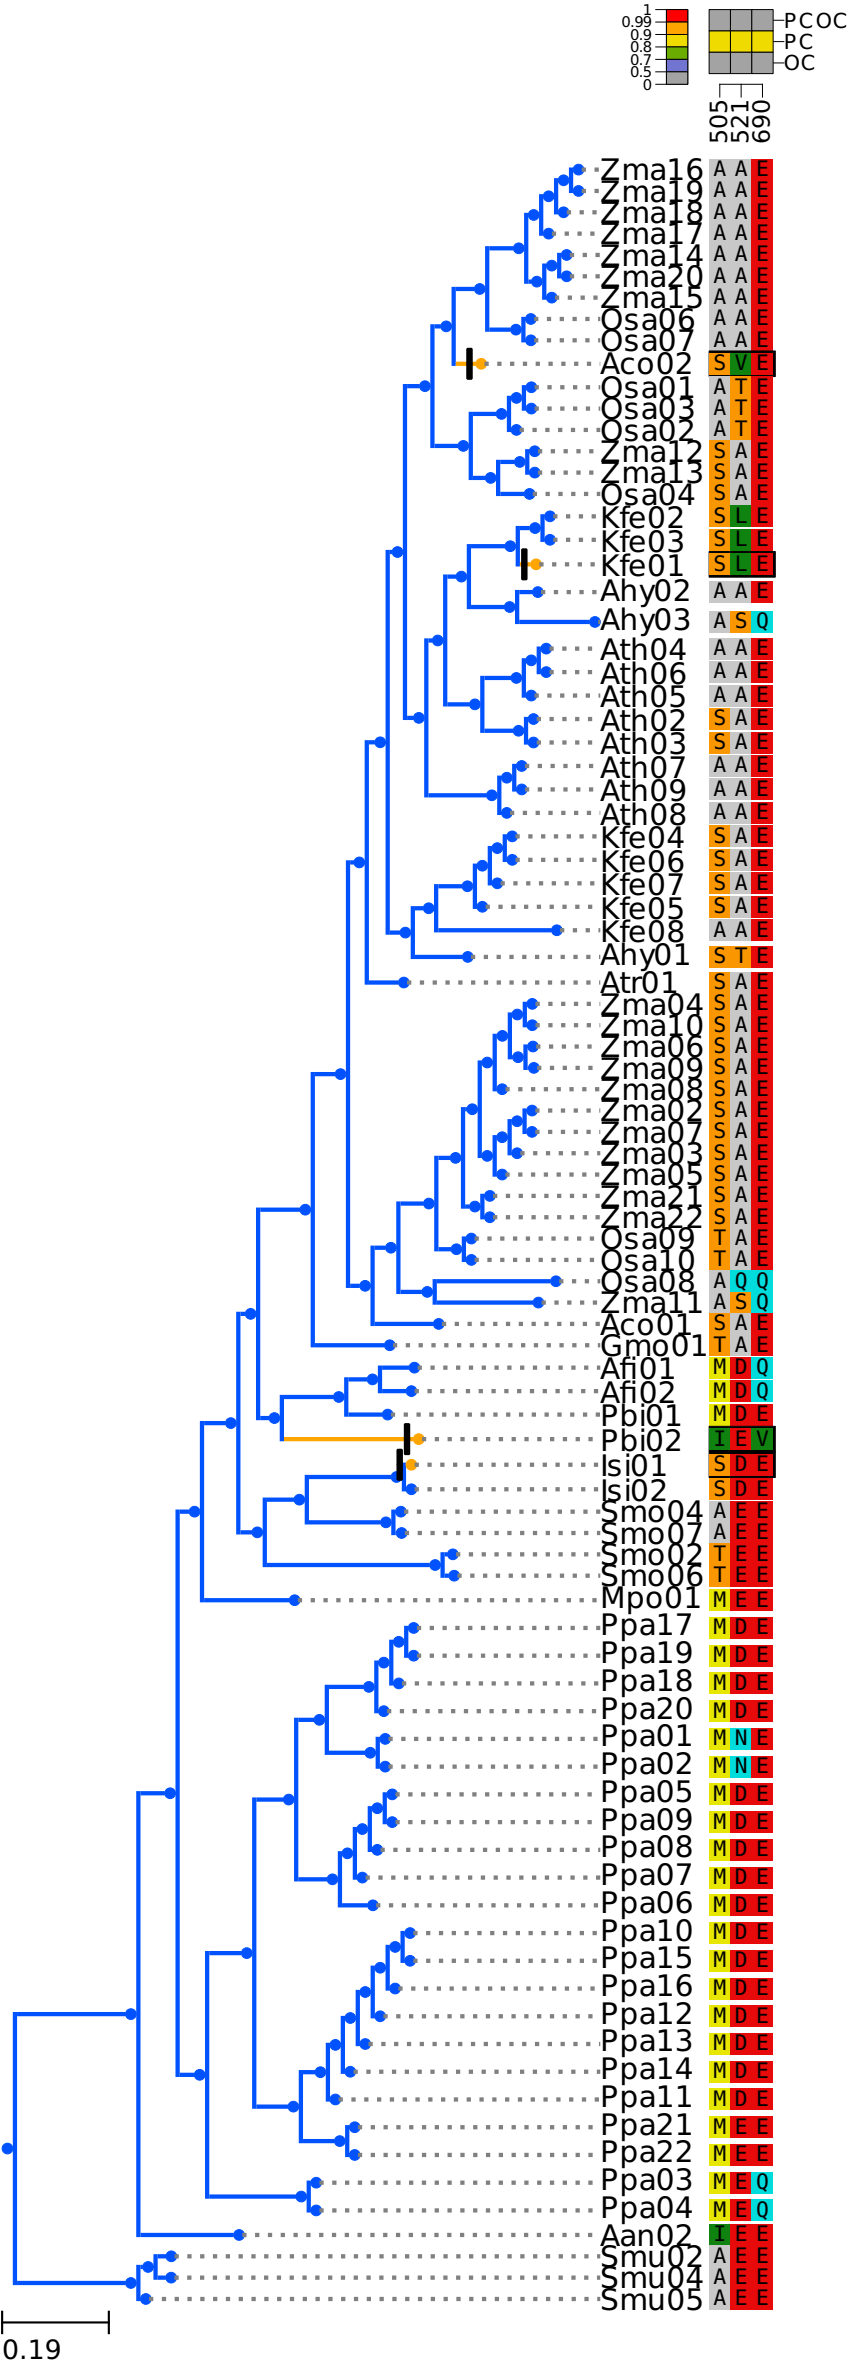

Supplement: Figure_S2.zip [file Figure_S2.zip]

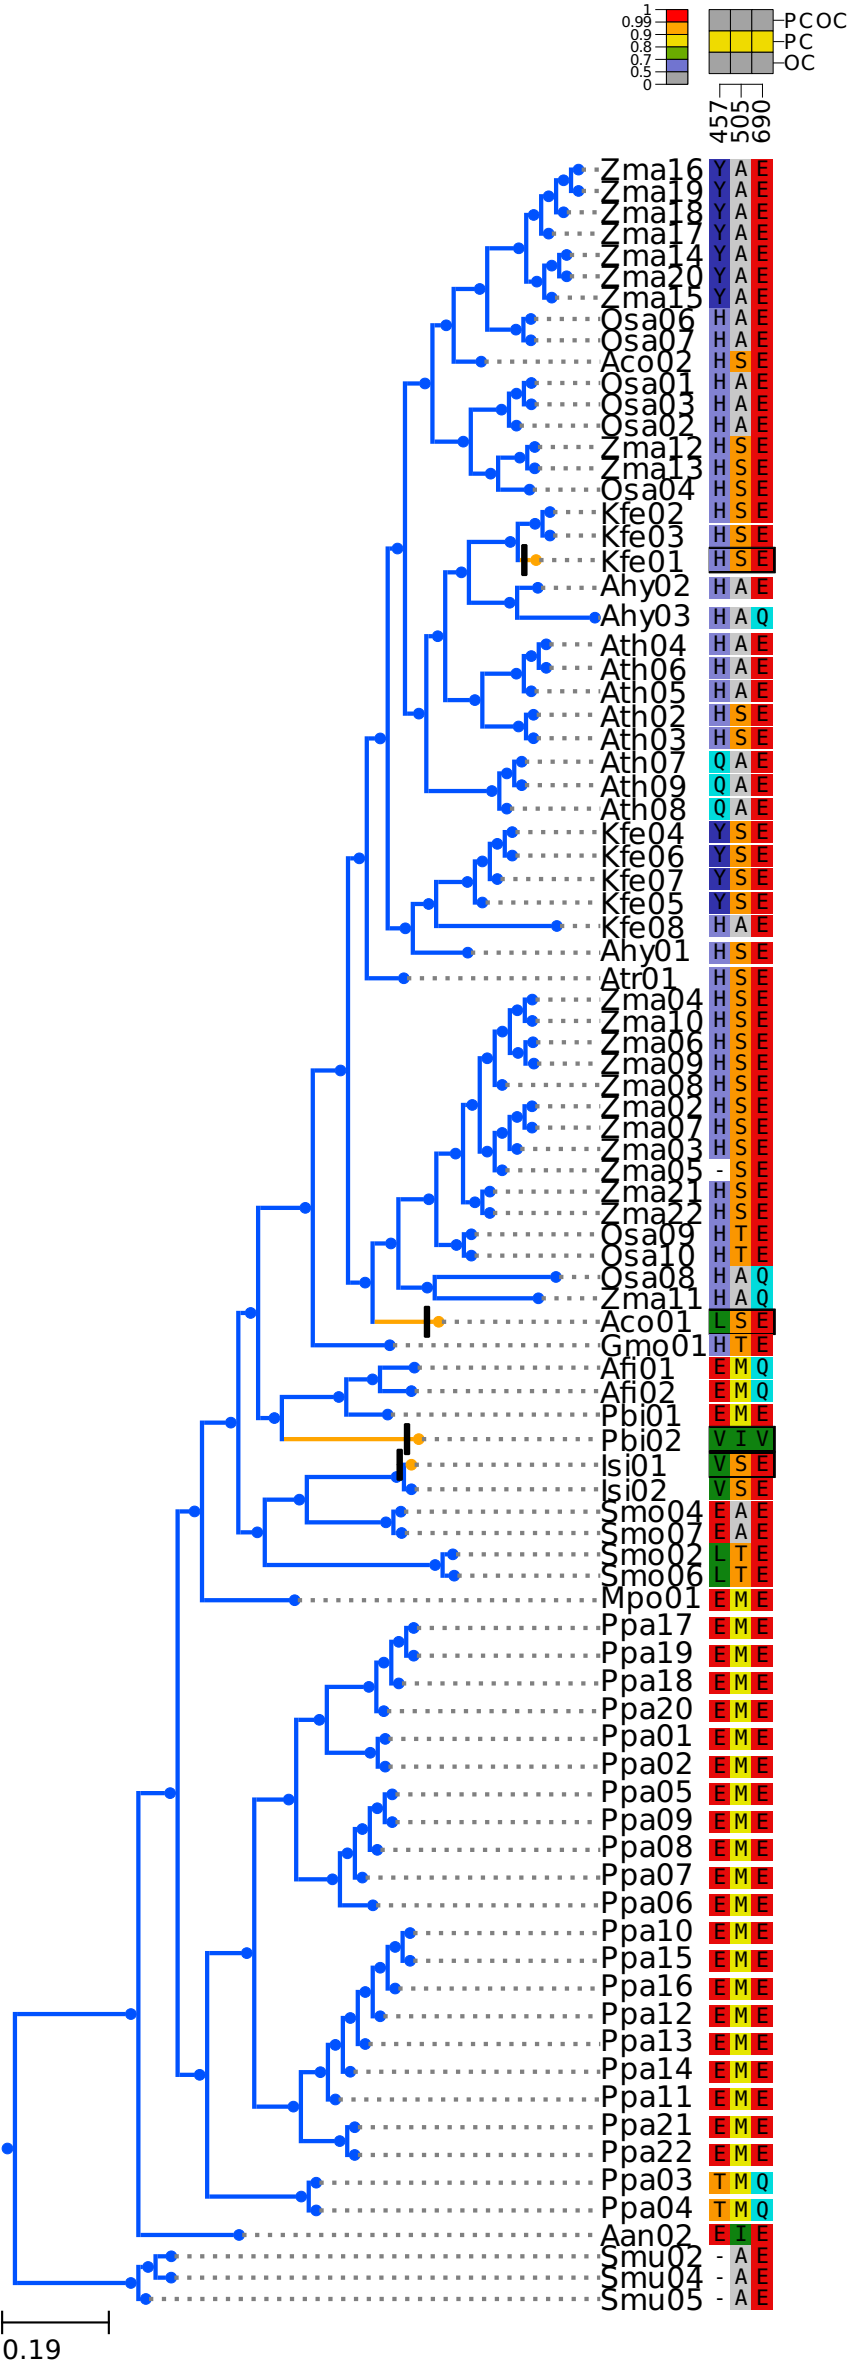

Supplement: Figure_S2.zip [file Figure_S2.zip]

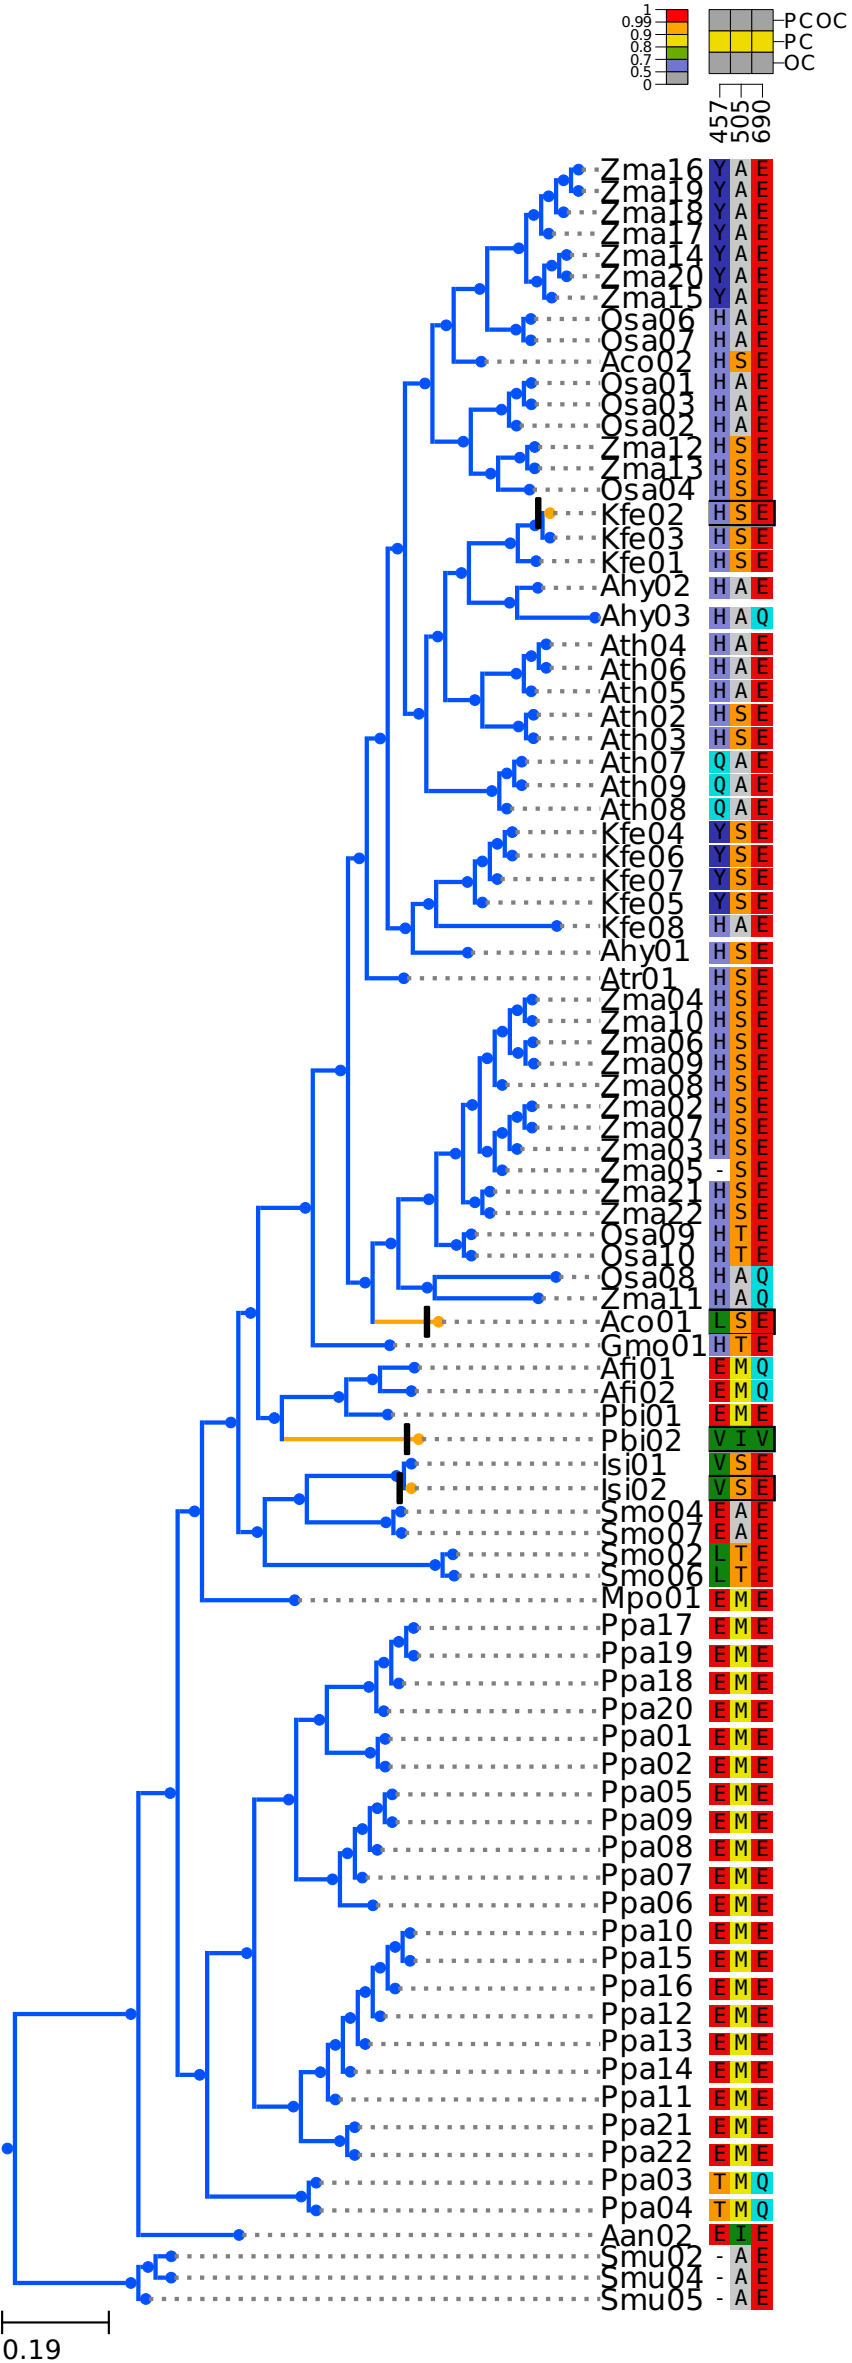

Supplement: Figure_S2.zip [file Figure_S2.zip]

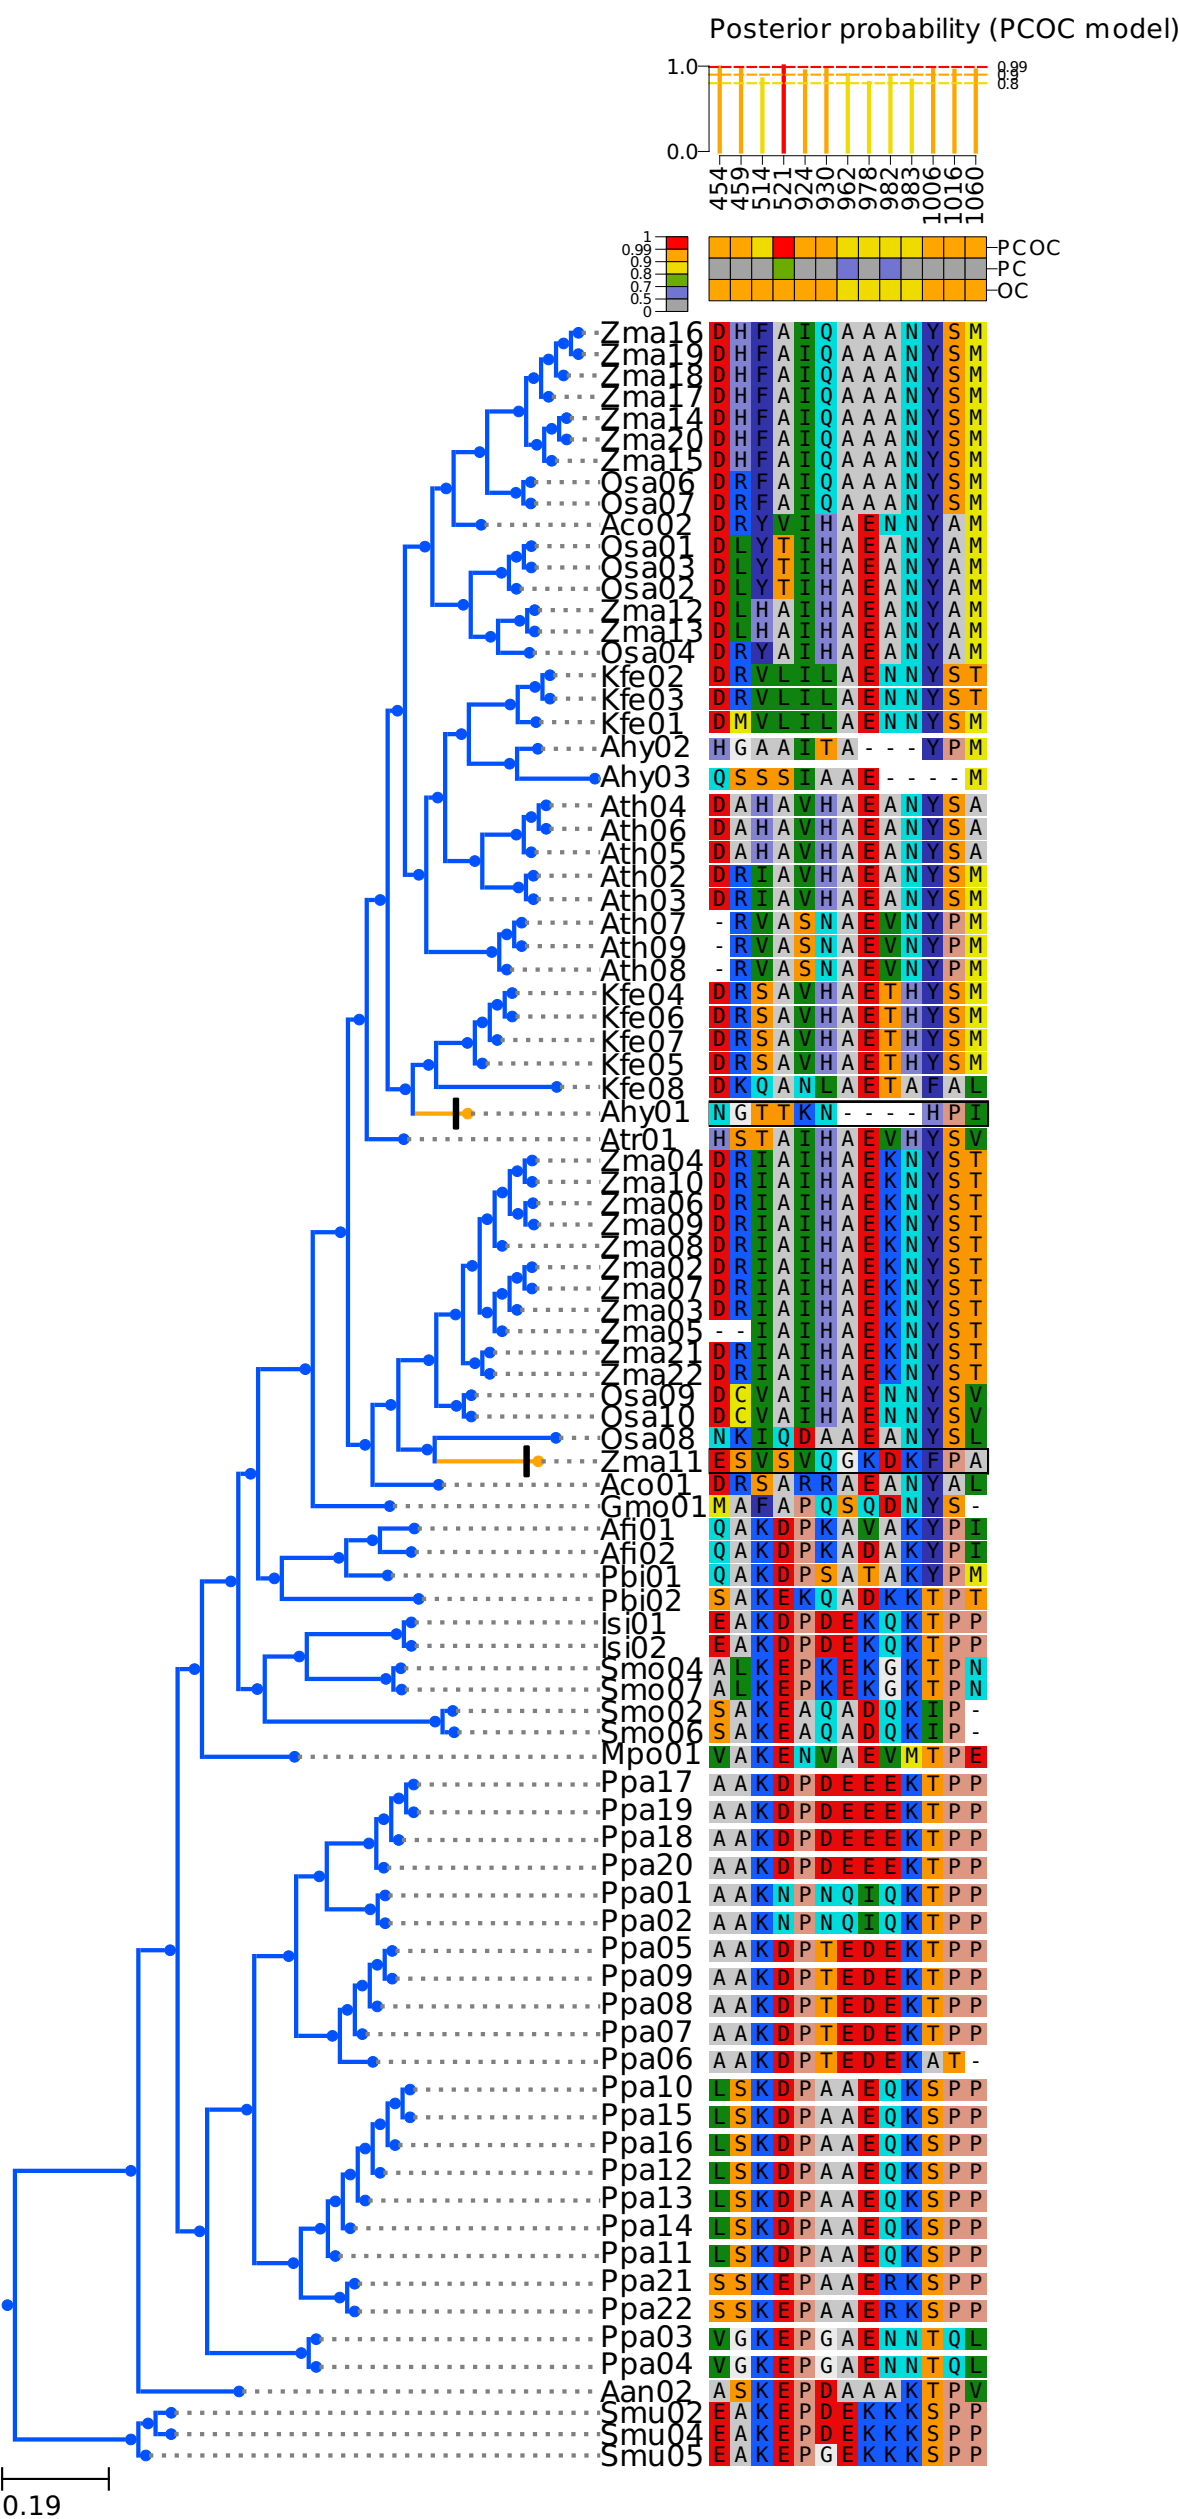

Supplement: Figure_S2.zip [file Figure_S2.zip]

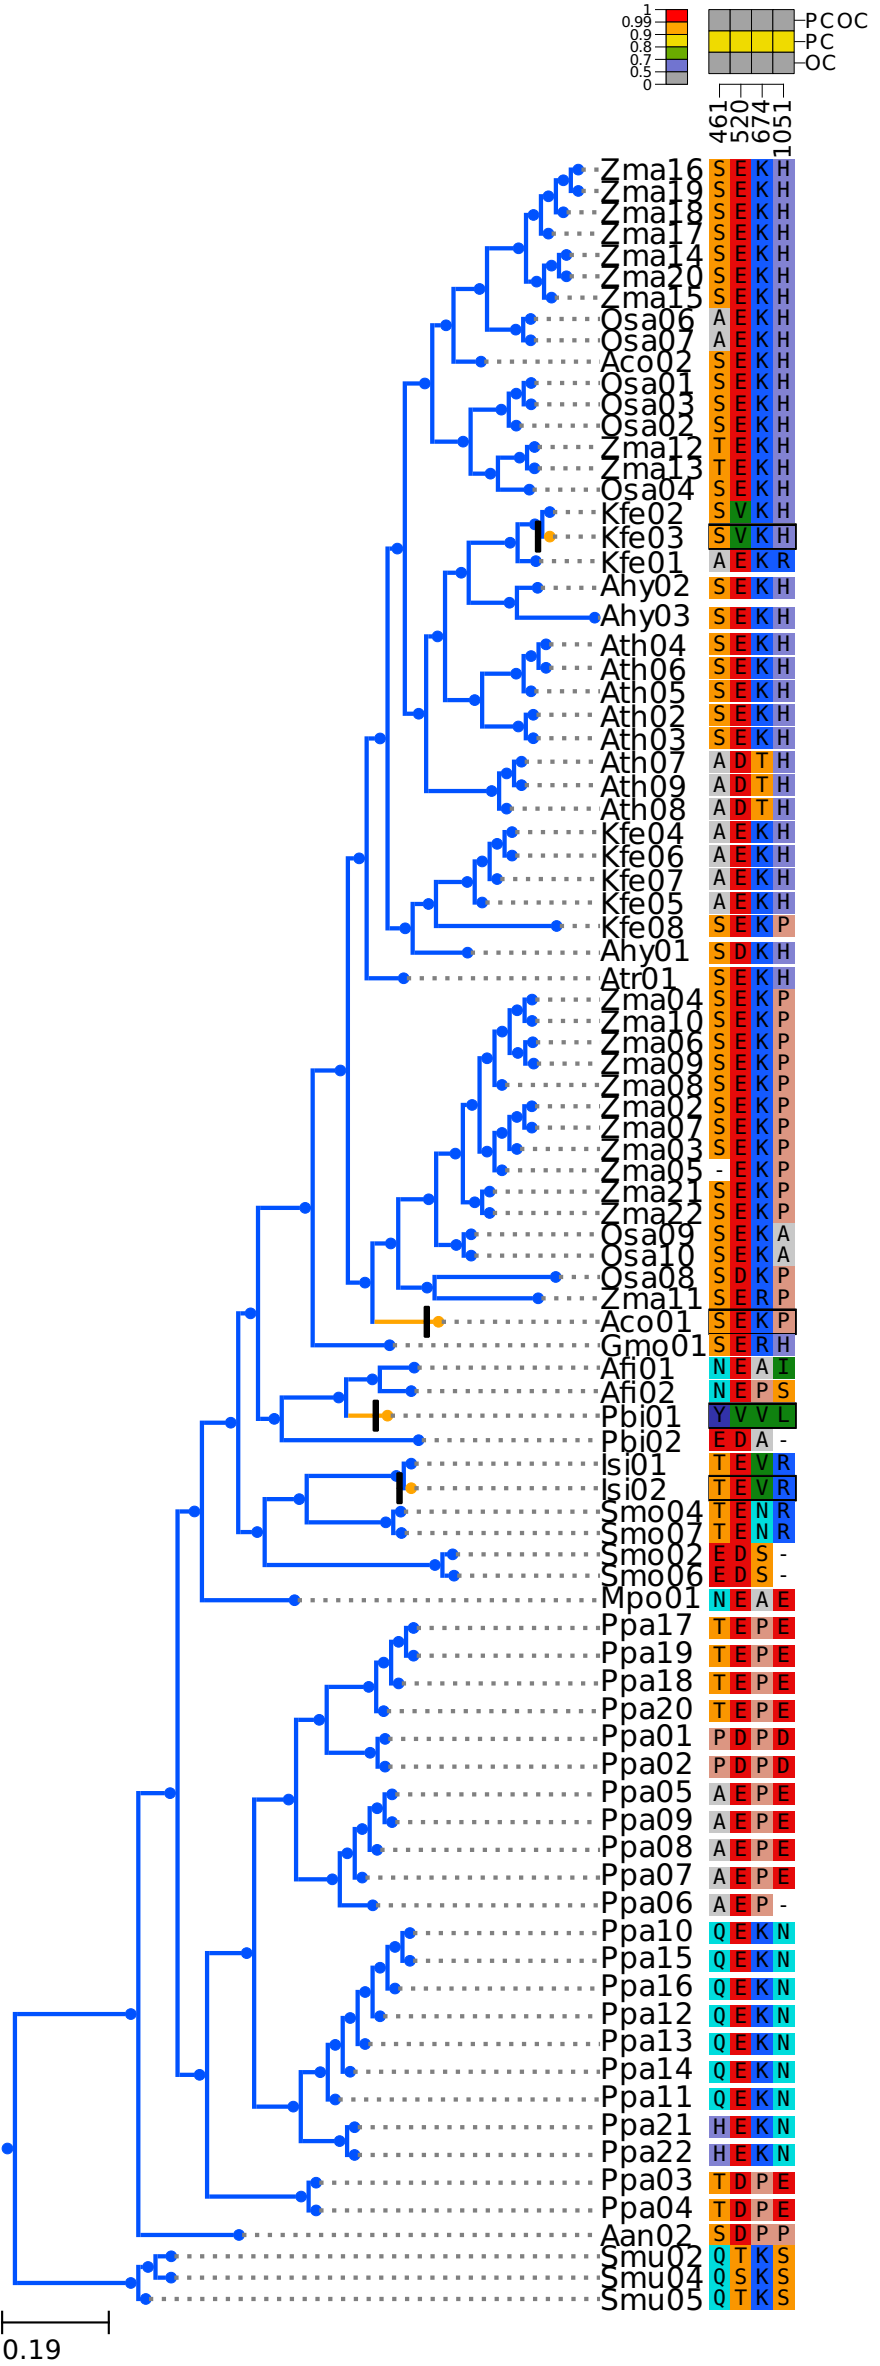

0.19

Supplement: Figure_S2.zip [file Figure_S2.zip]

Posterior probability (PCOC model)

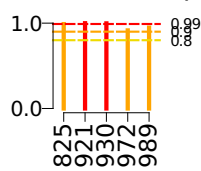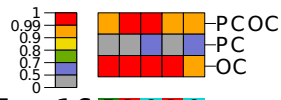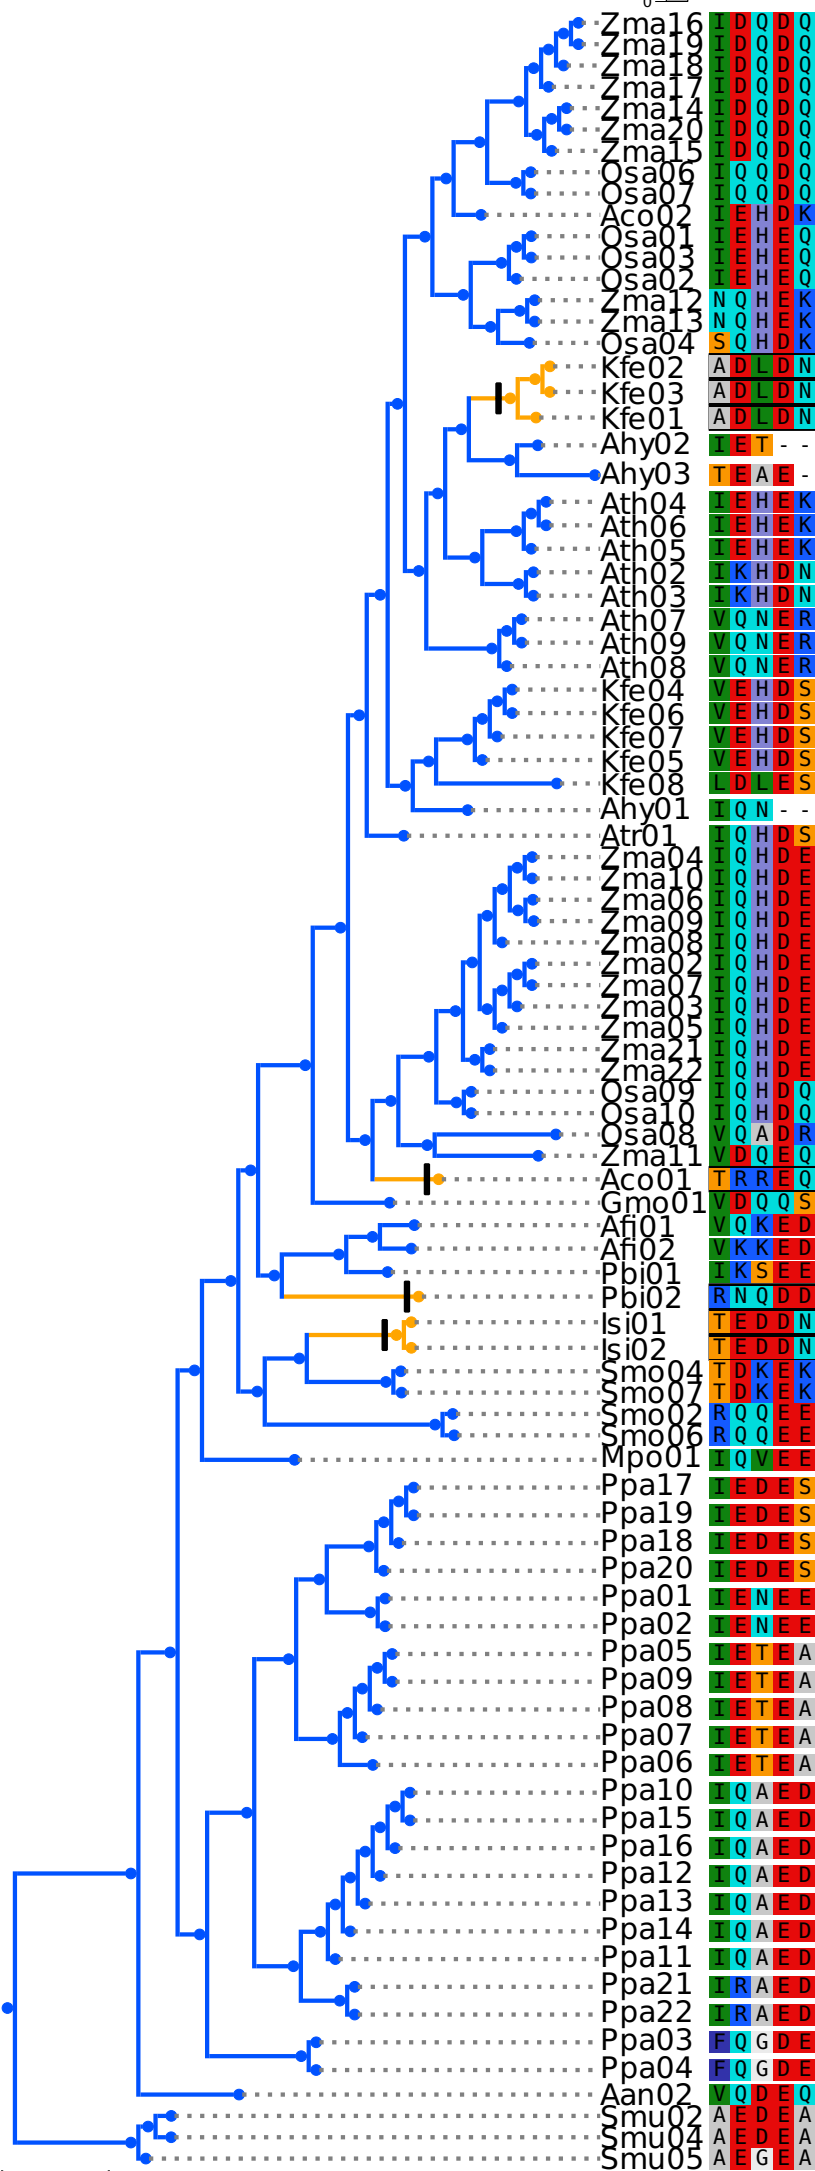

0.19

Supplement: Figure_S2.zip [file Figure_S2.zip]

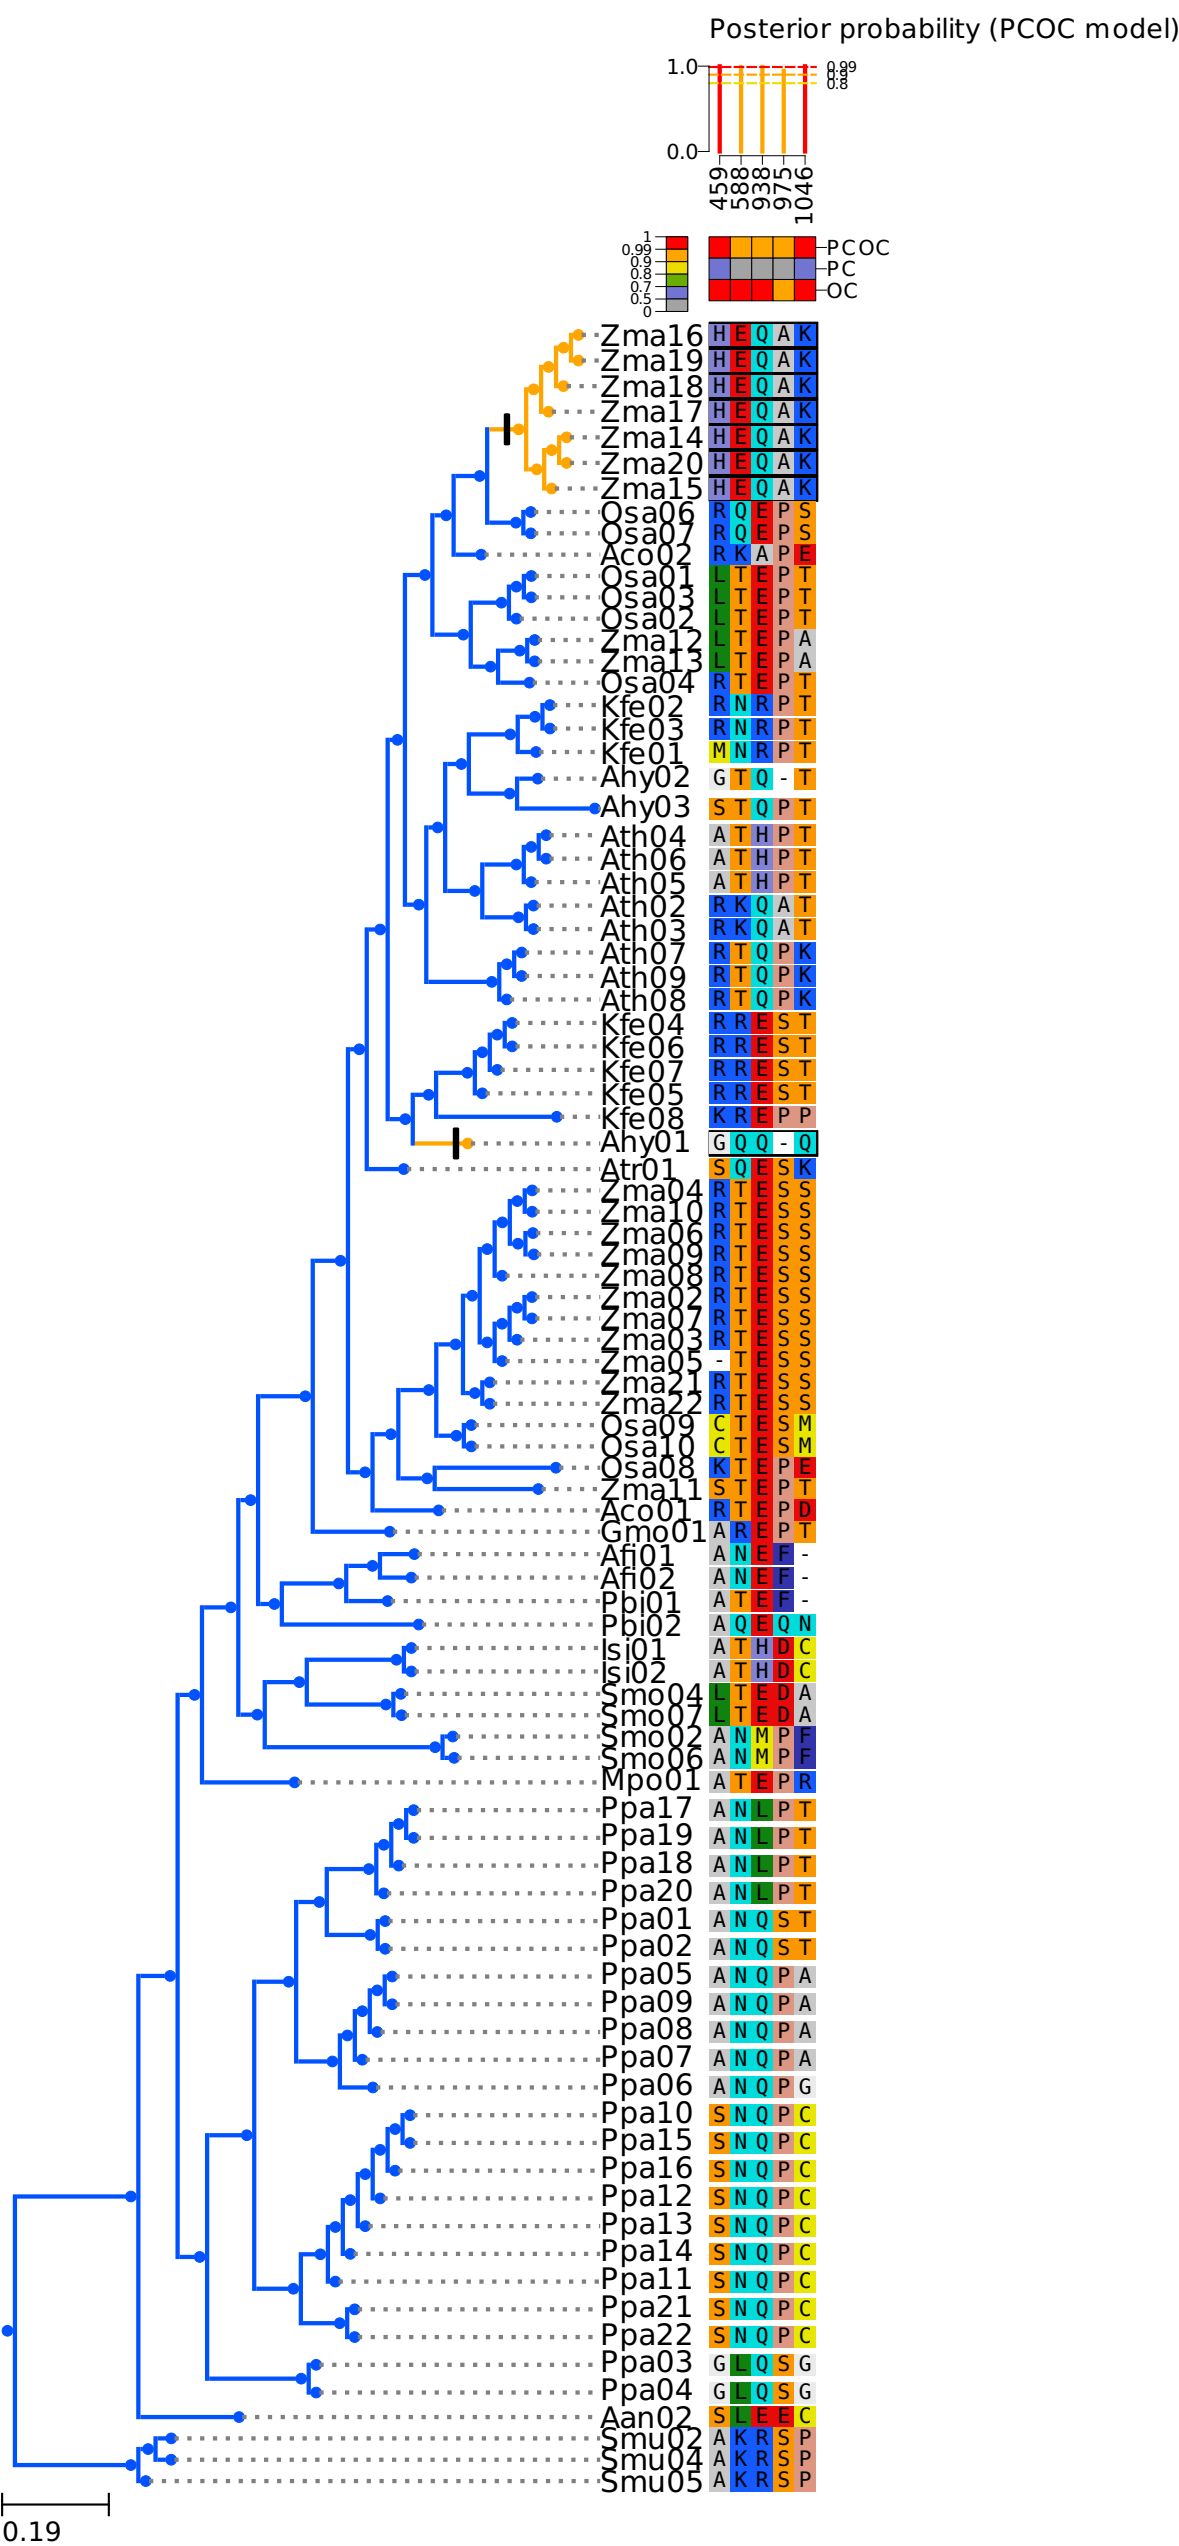

Supplement: Figure_S2.zip [file Figure_S2.zip]

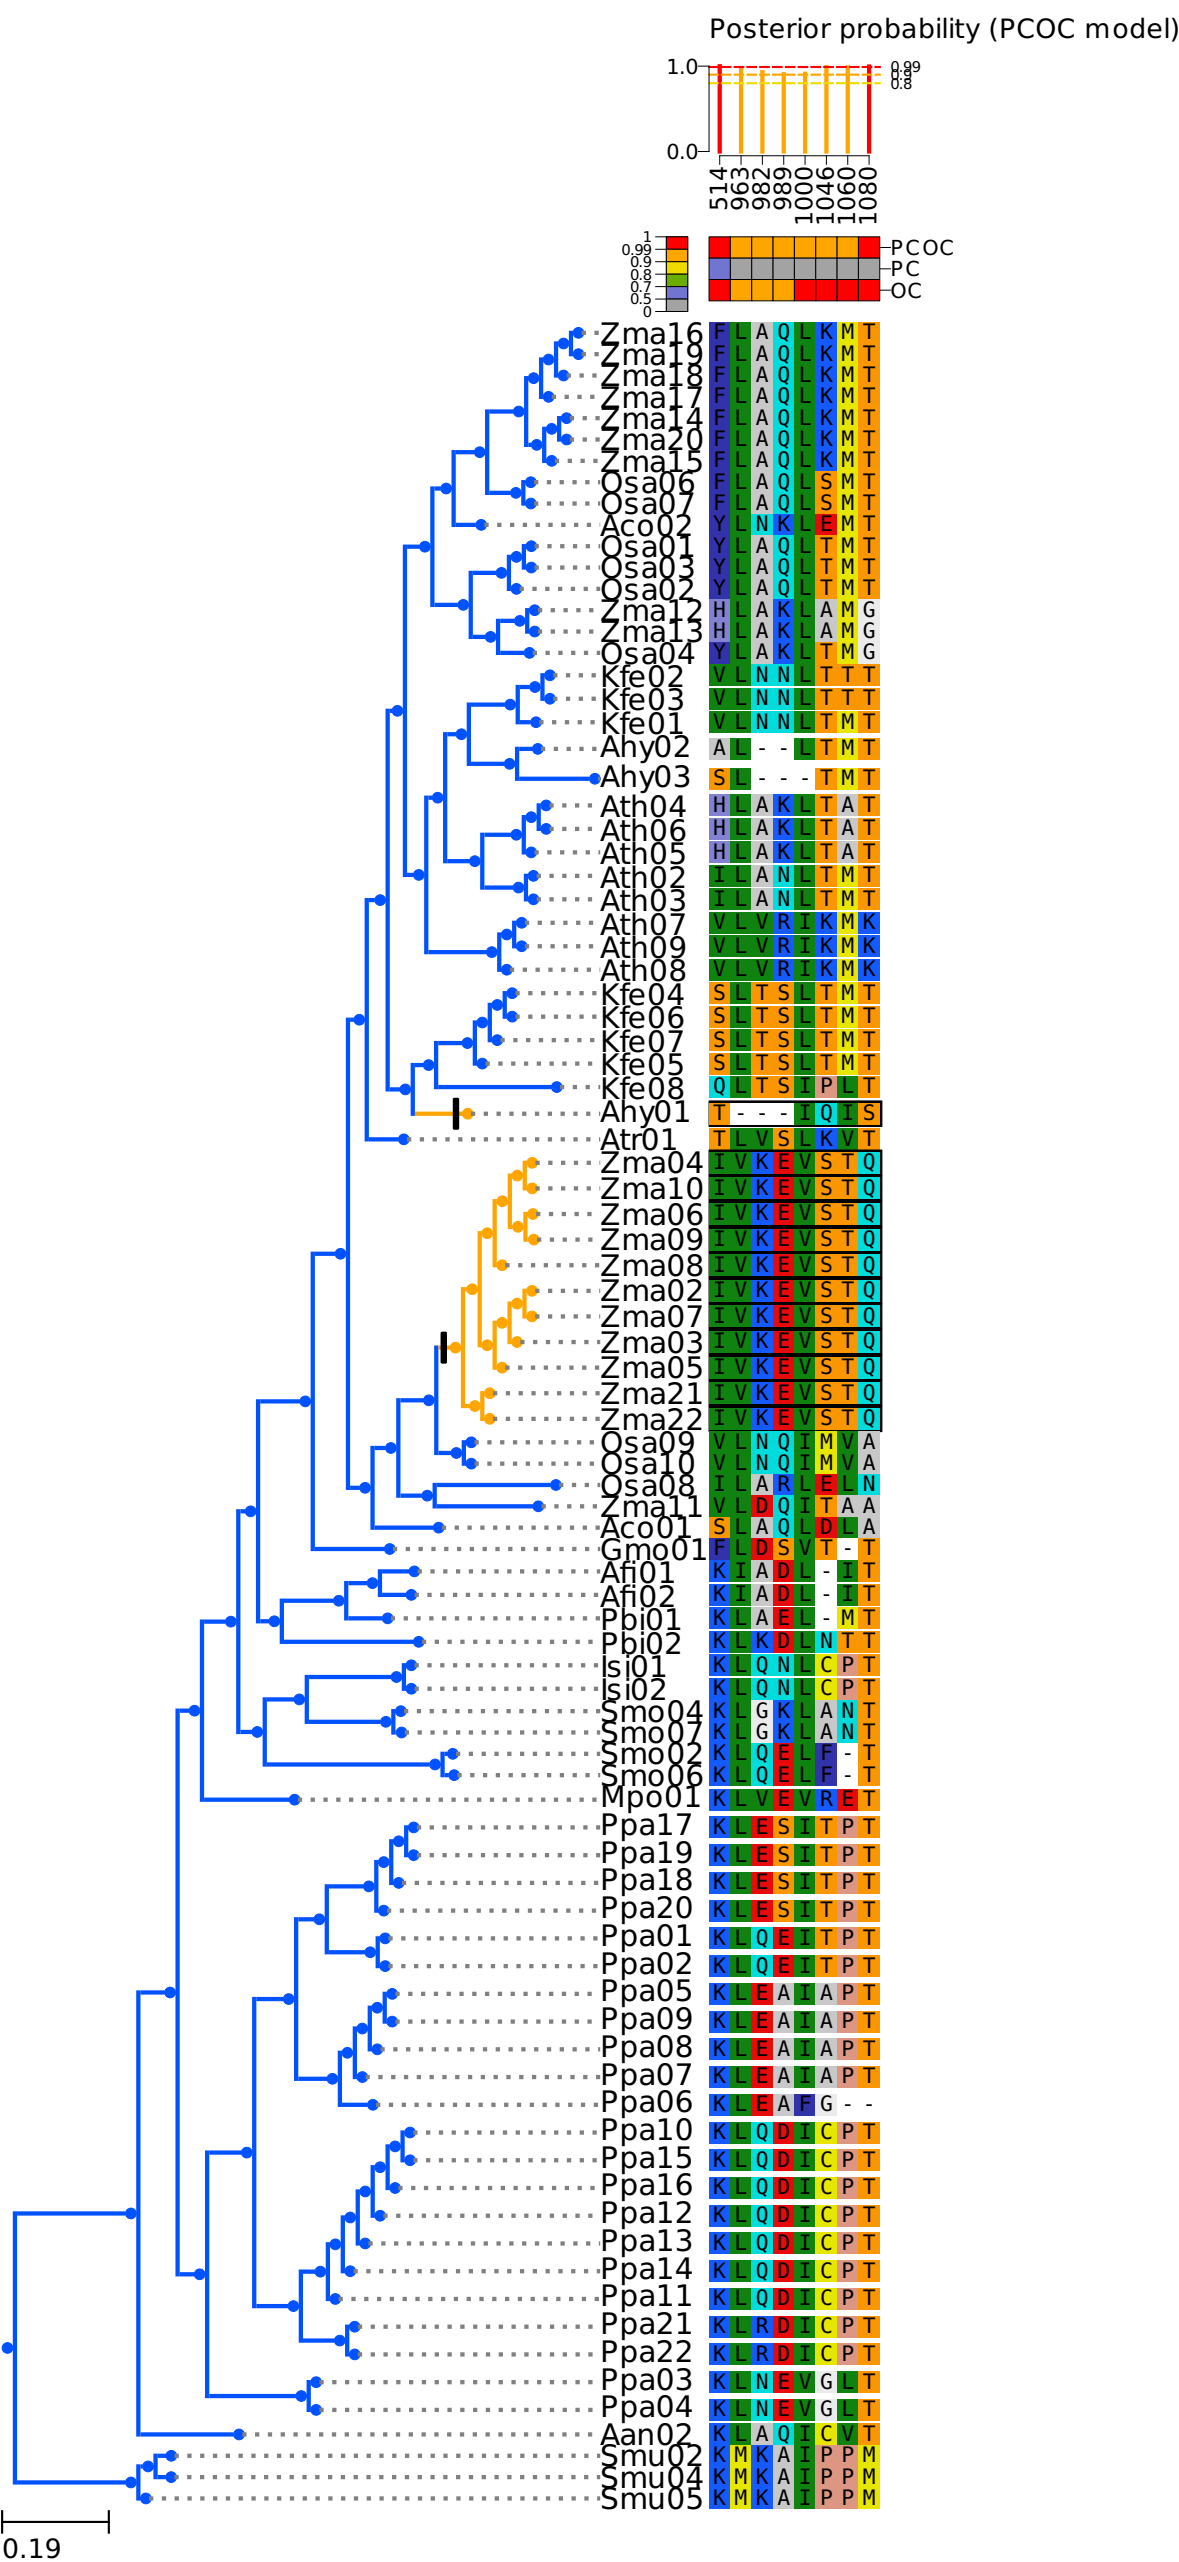

Supplement: Figure_S2.zip [file Figure_S2.zip]

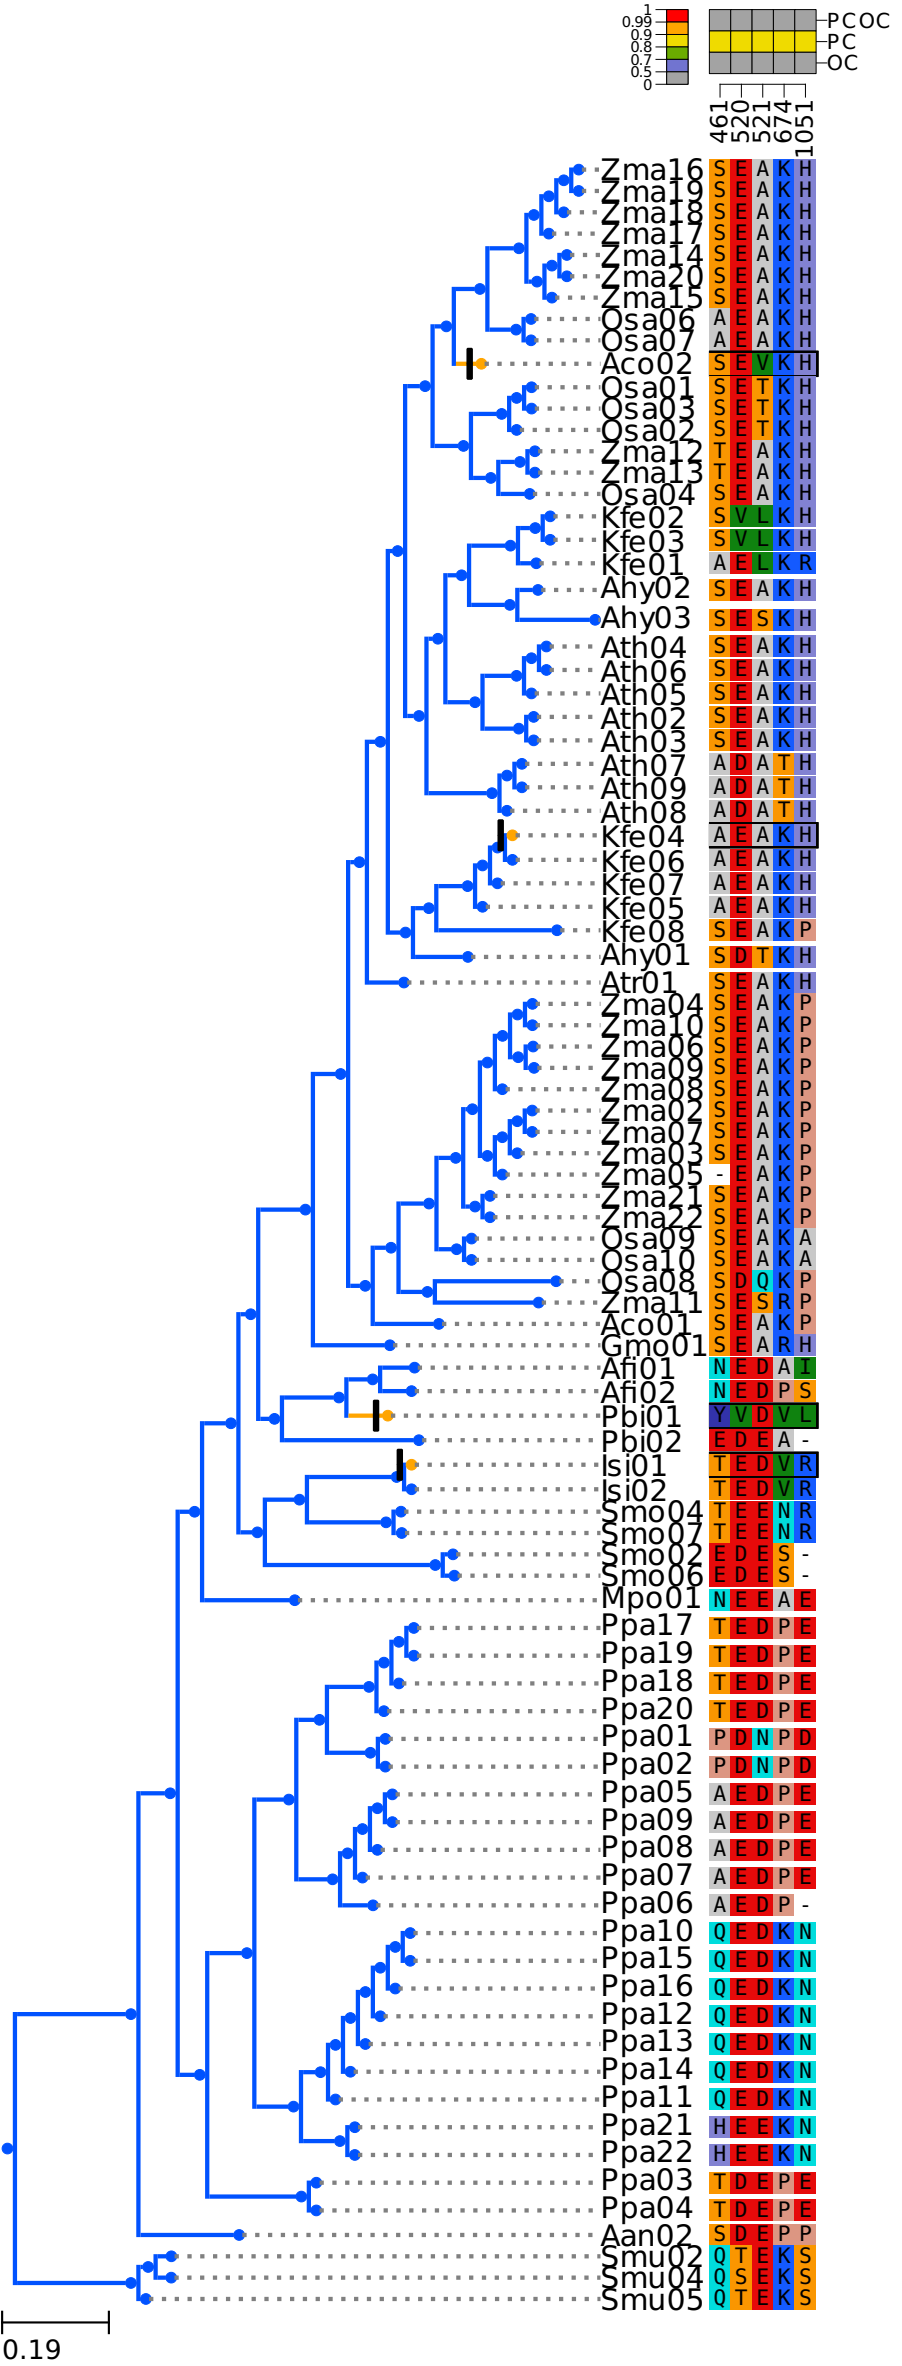

Supplement: Figure_S2.zip [file Figure_S2.zip]

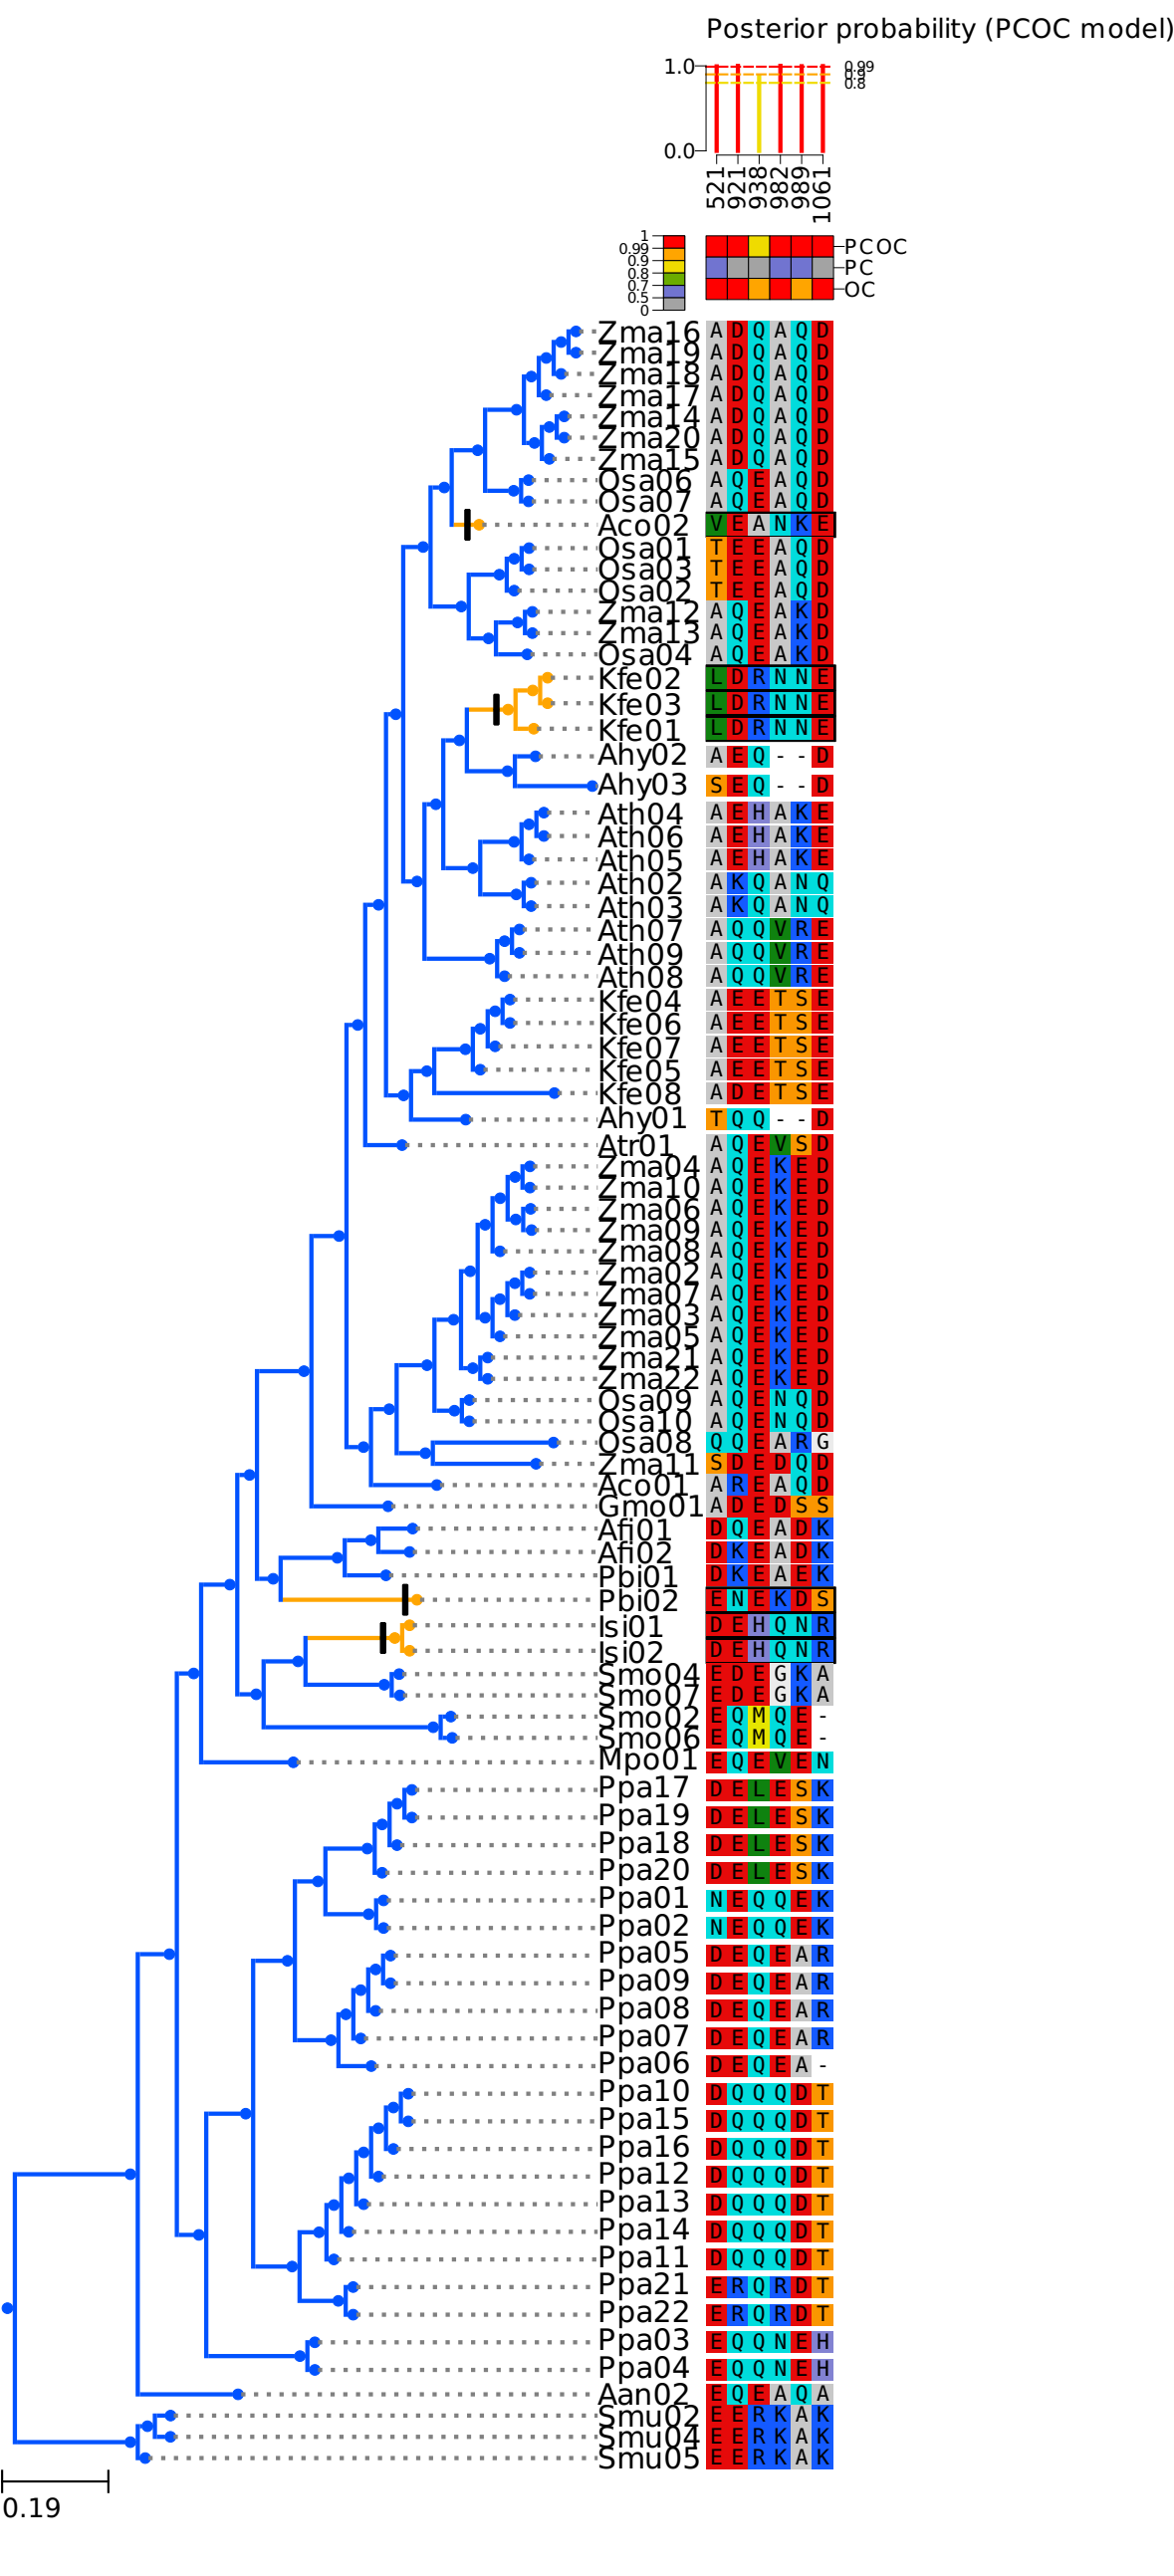

Supplement: Figure_S2.zip [file Figure_S2.zip]

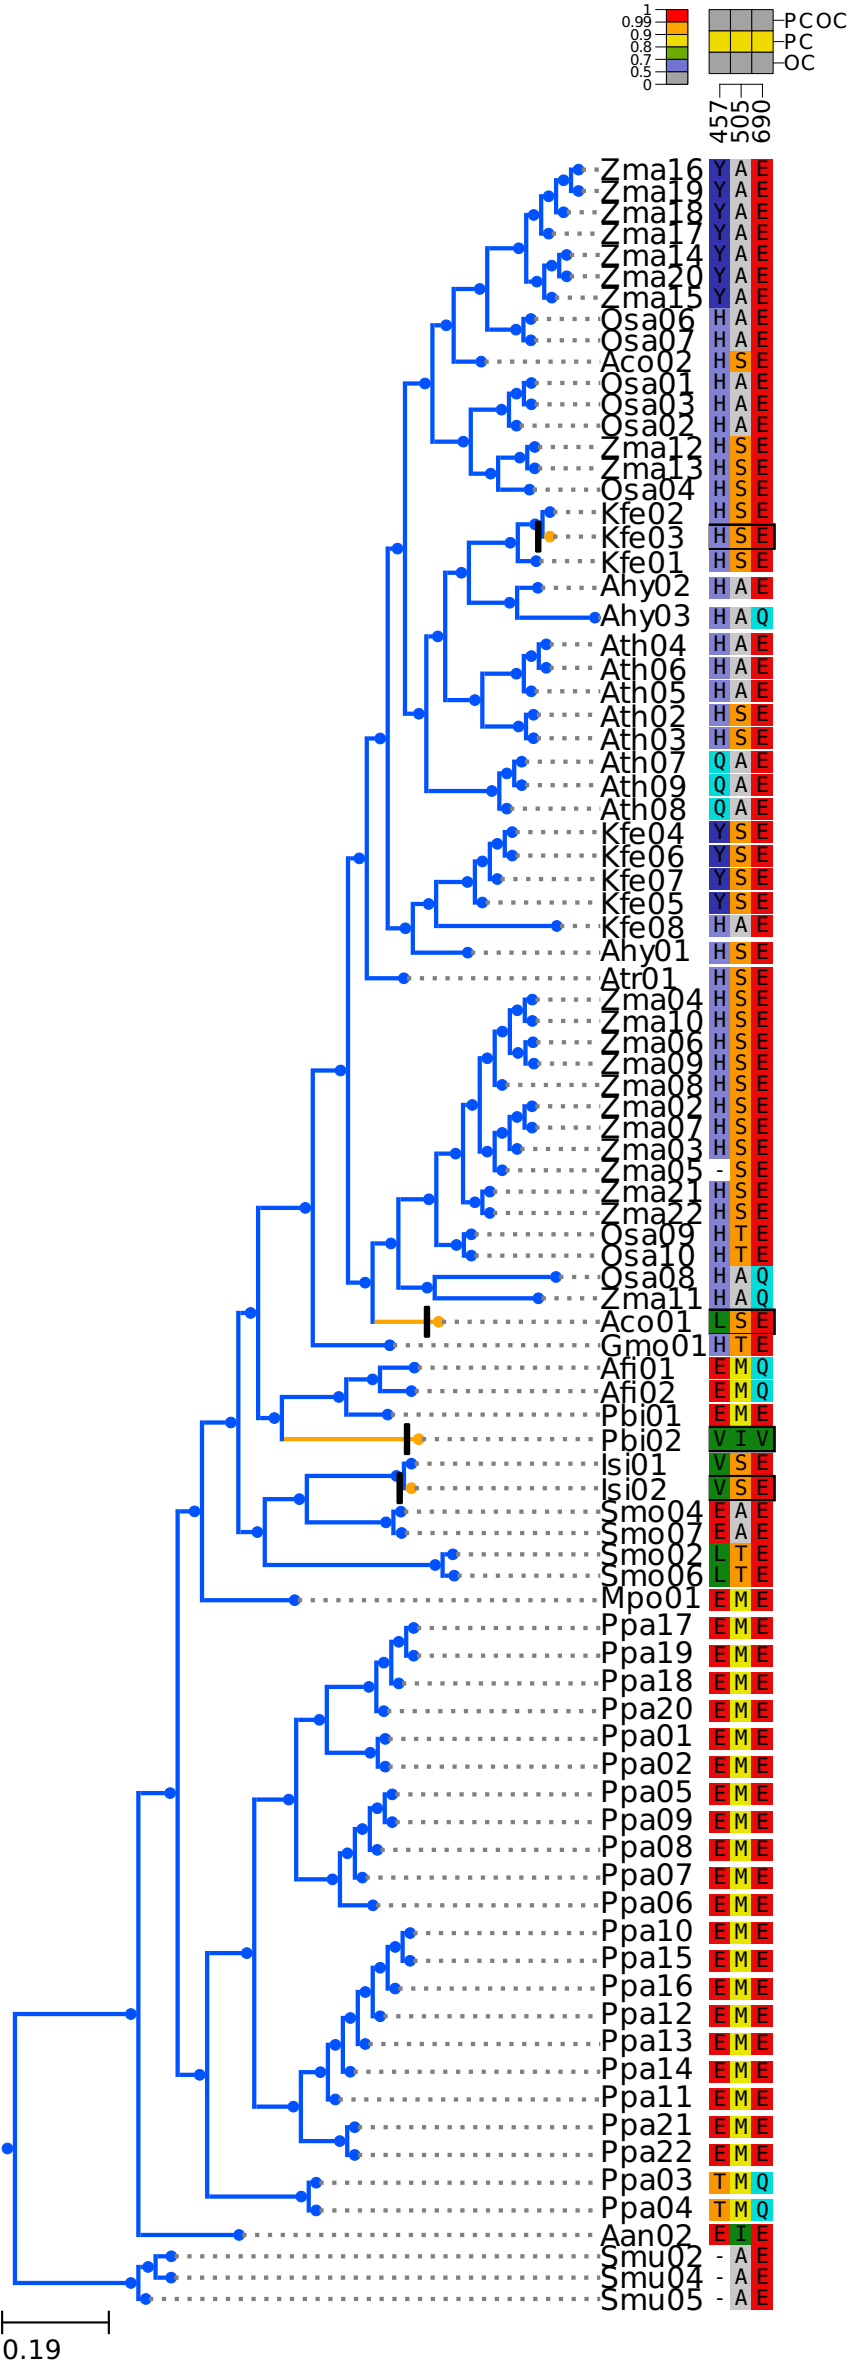

Supplement: Figure_S2.zip [file Figure_S2.zip]

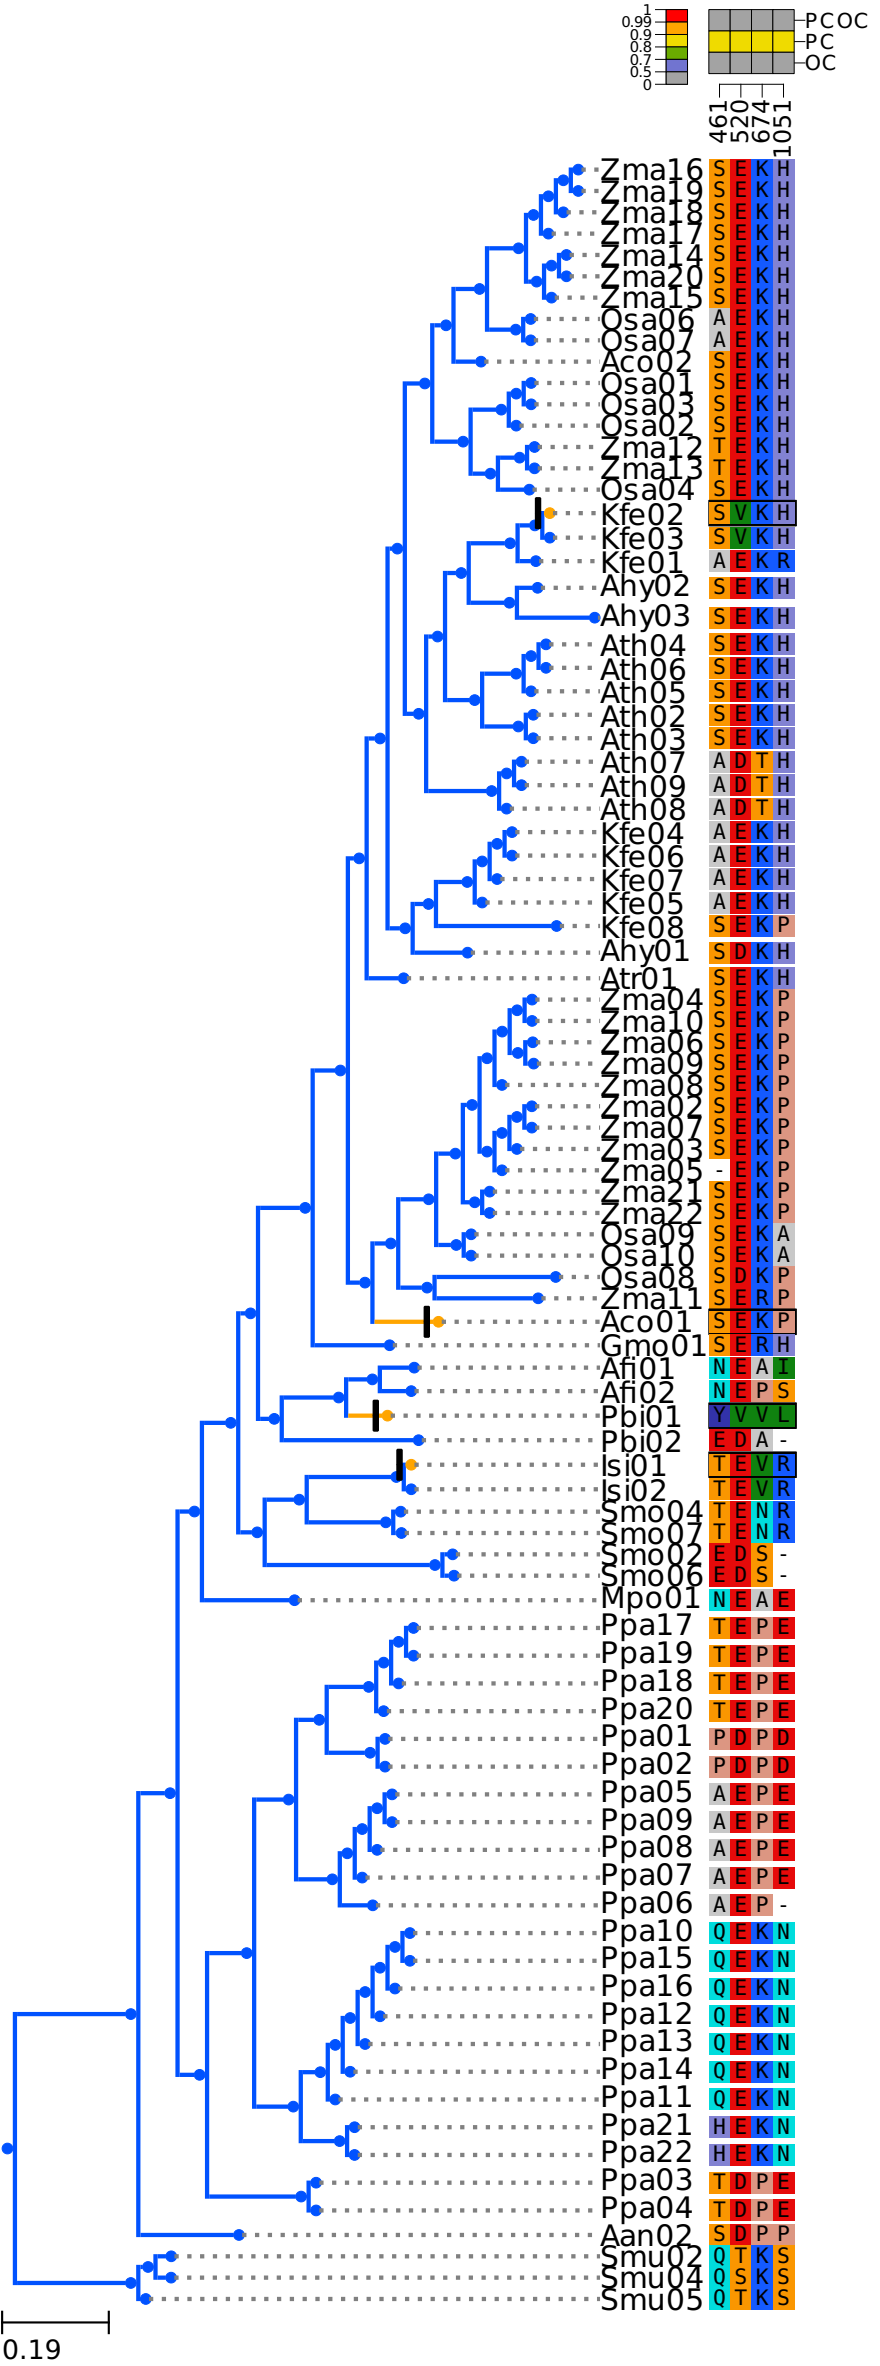

0.19

Supplement: Figure_S2.zip [file Figure_S2.zip]

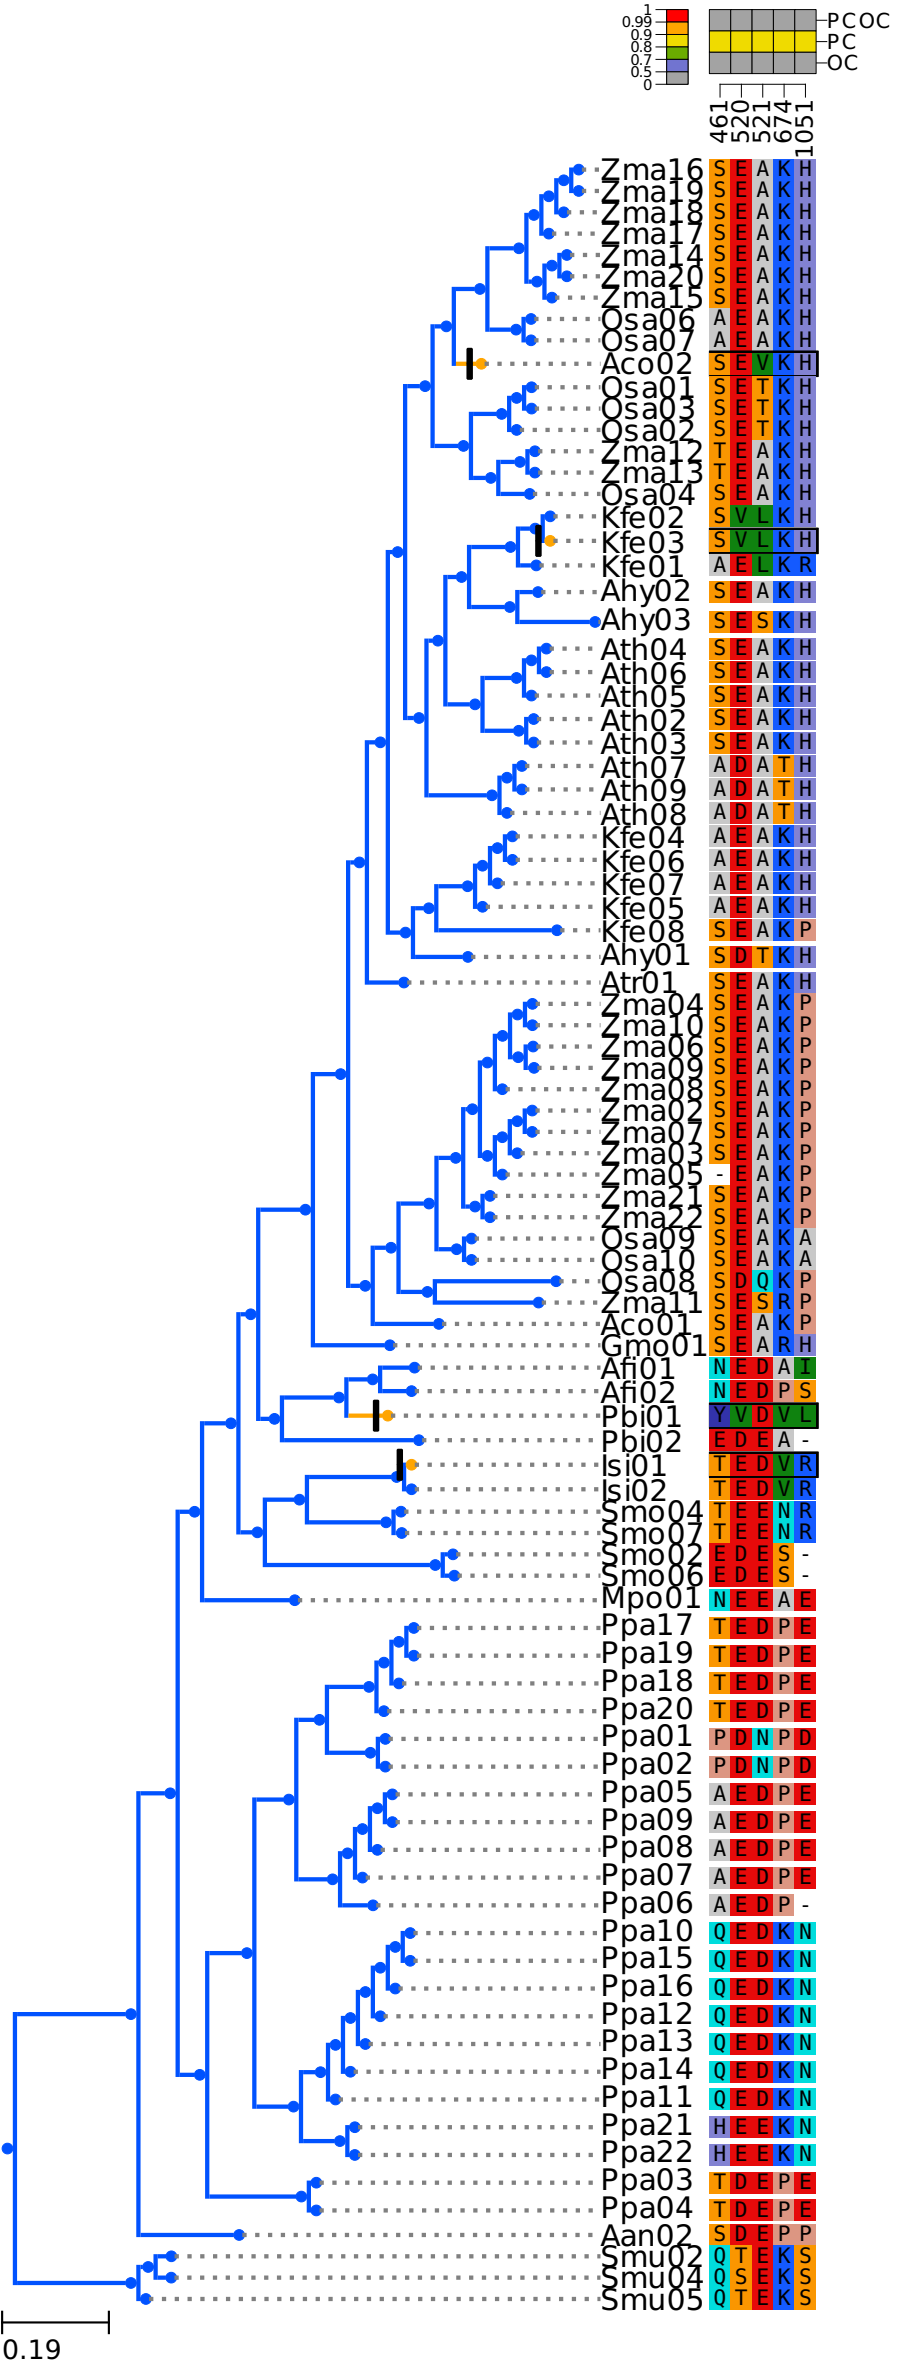

Supplement: Figure_S2.zip [file Figure_S2.zip]

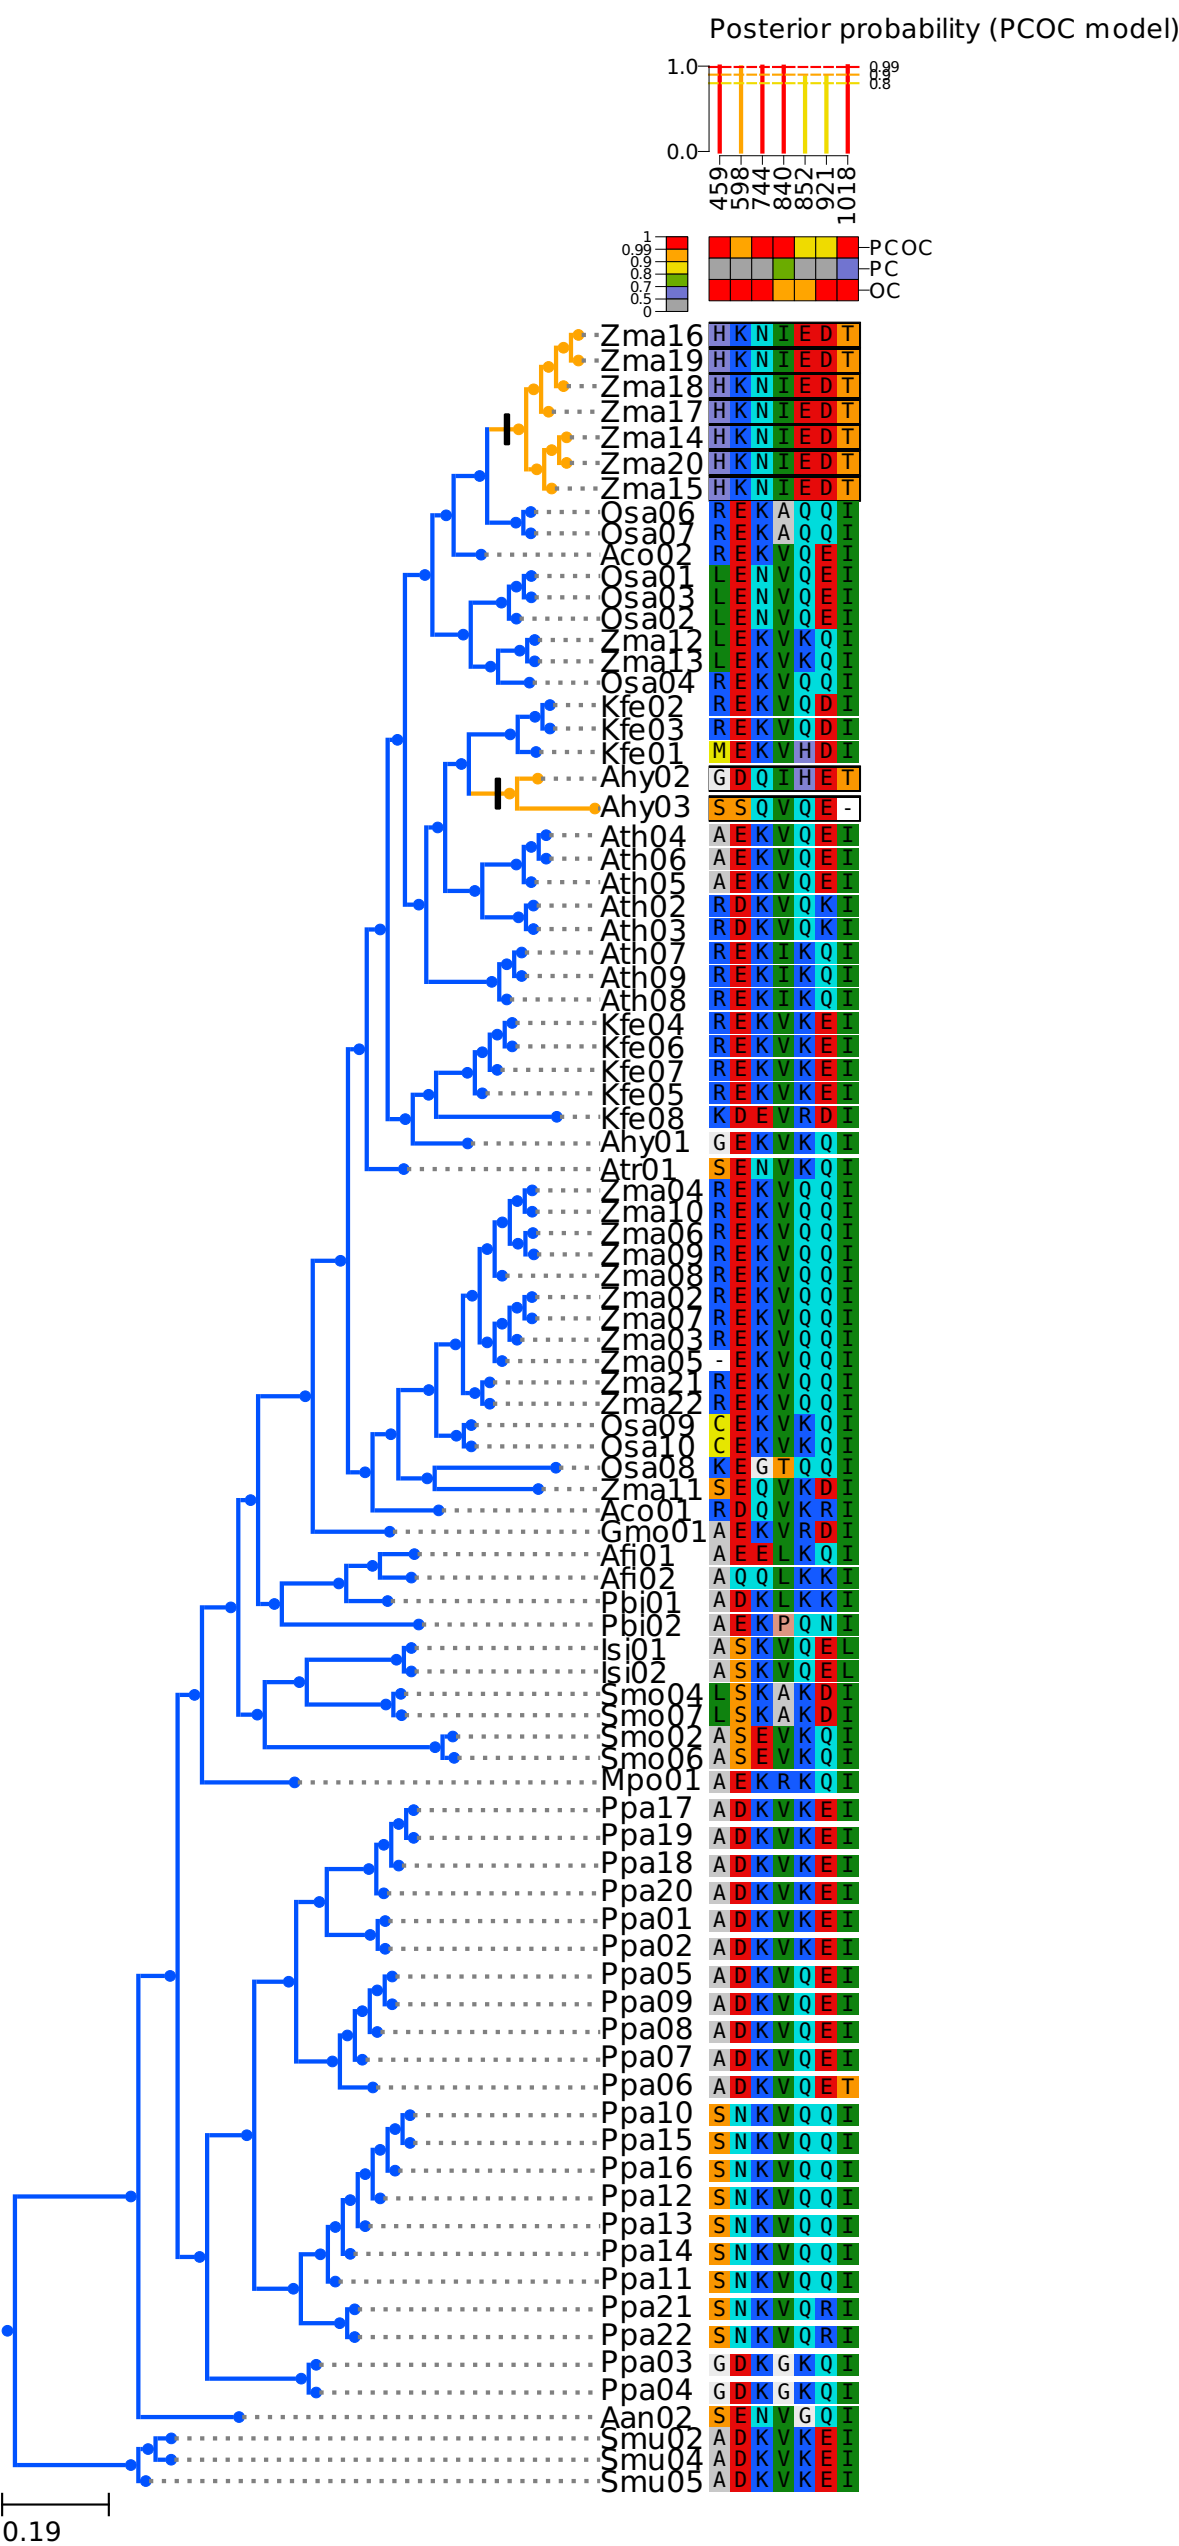

Supplement: Figure_S2.zip [file Figure_S2.zip]

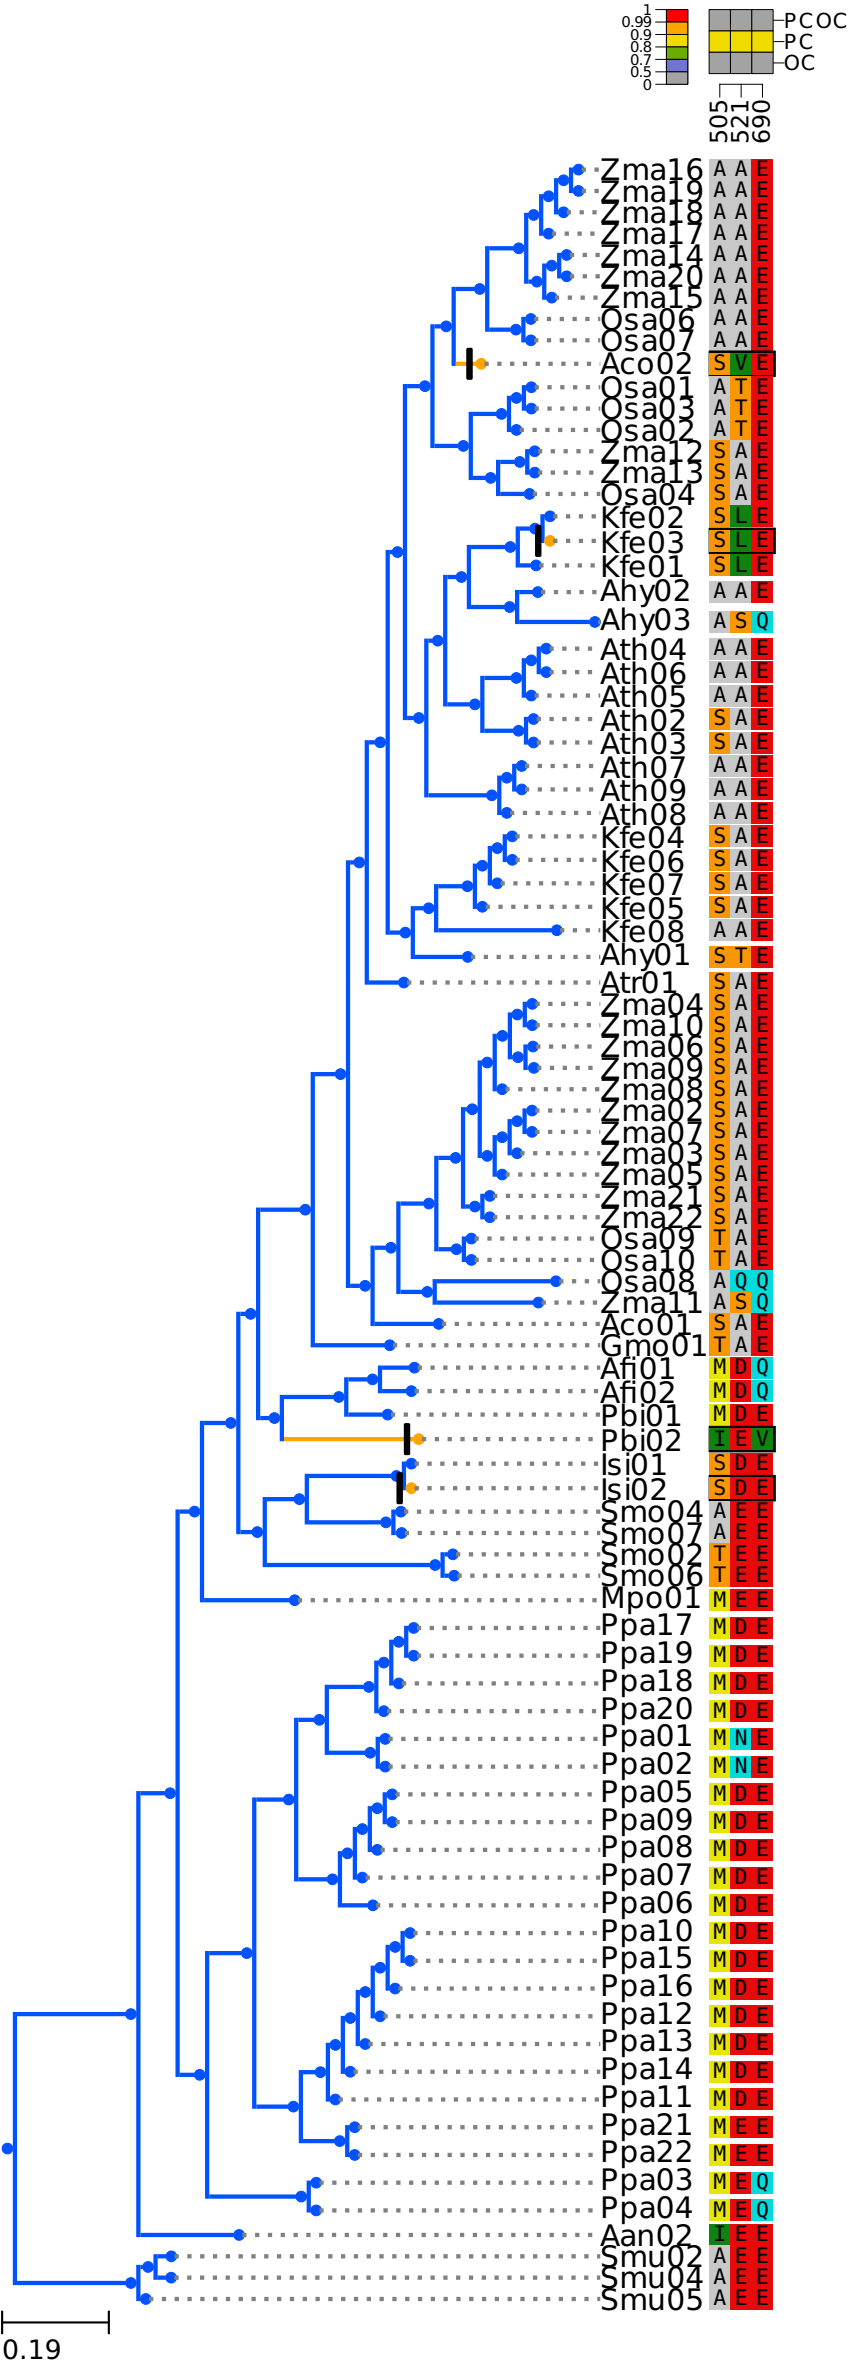

Supplement: Figure_S2.zip [file Figure_S2.zip]

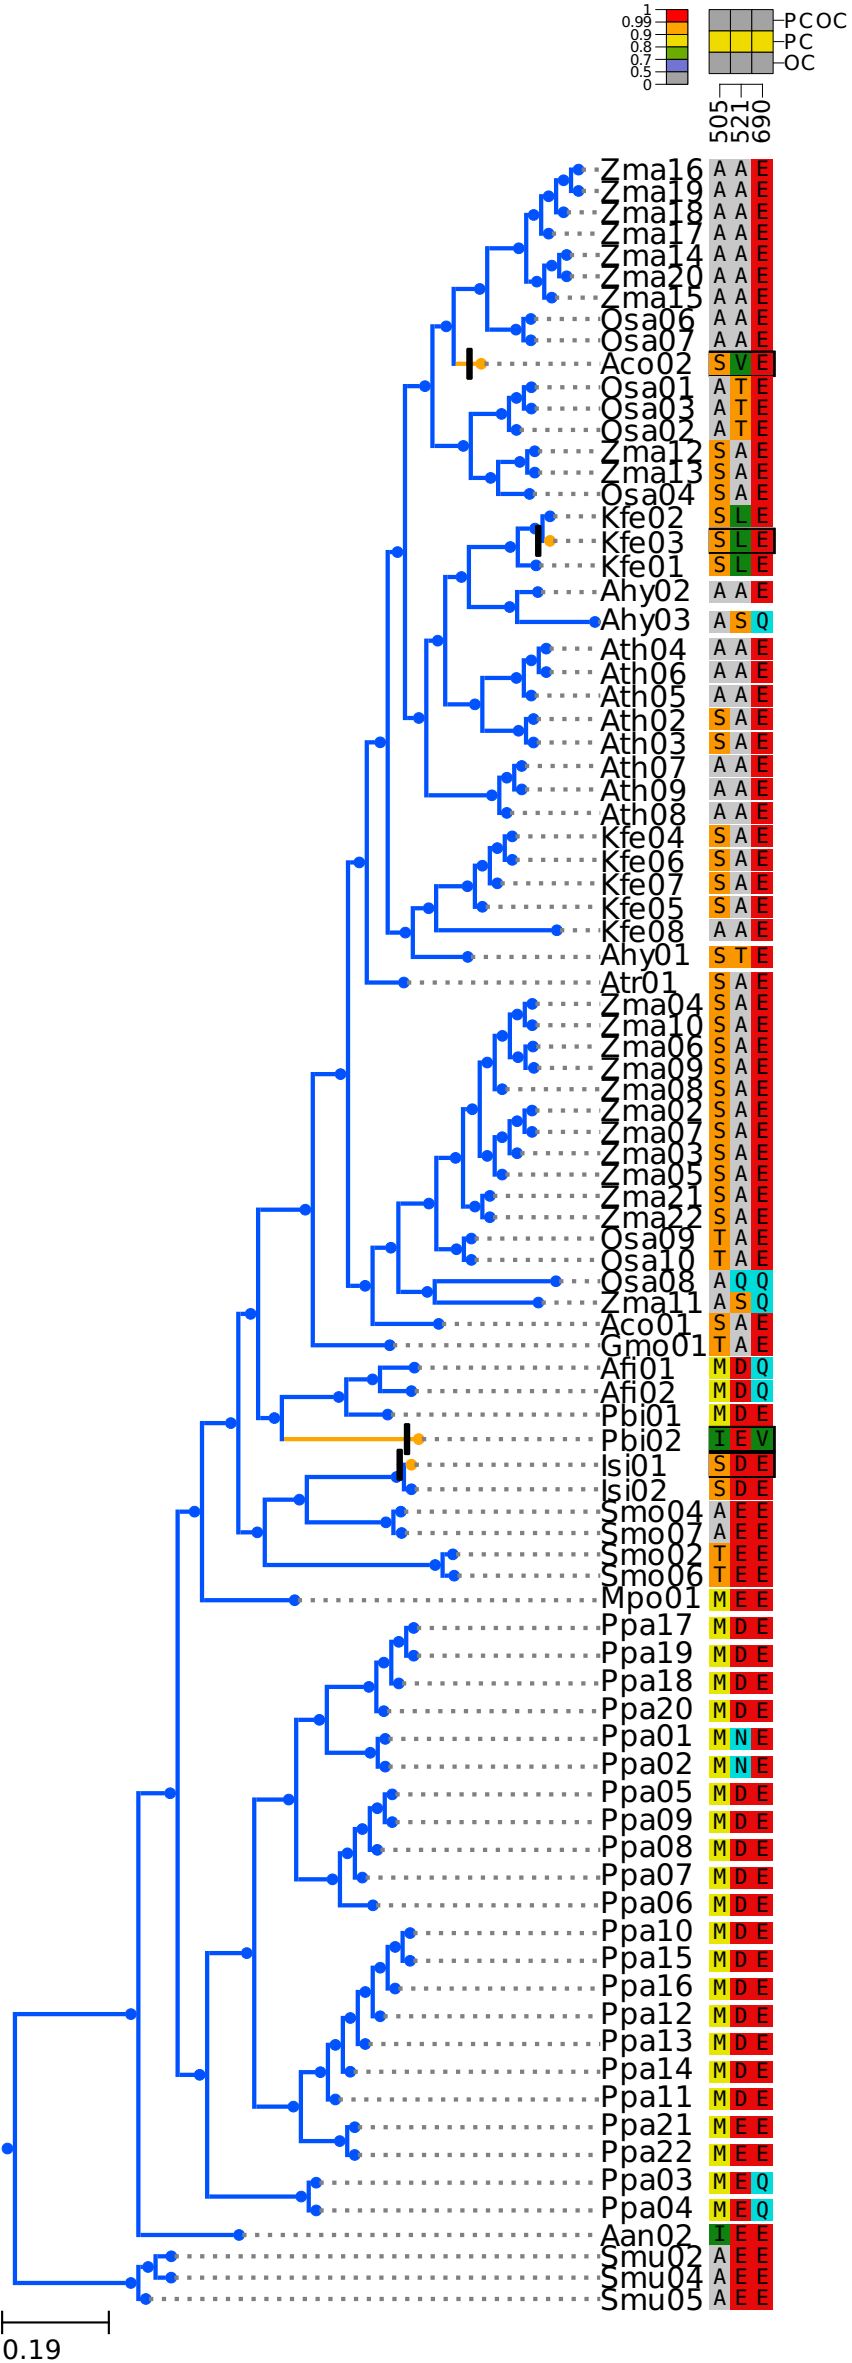

Supplement: Figure_S2.zip [file Figure_S2.zip]

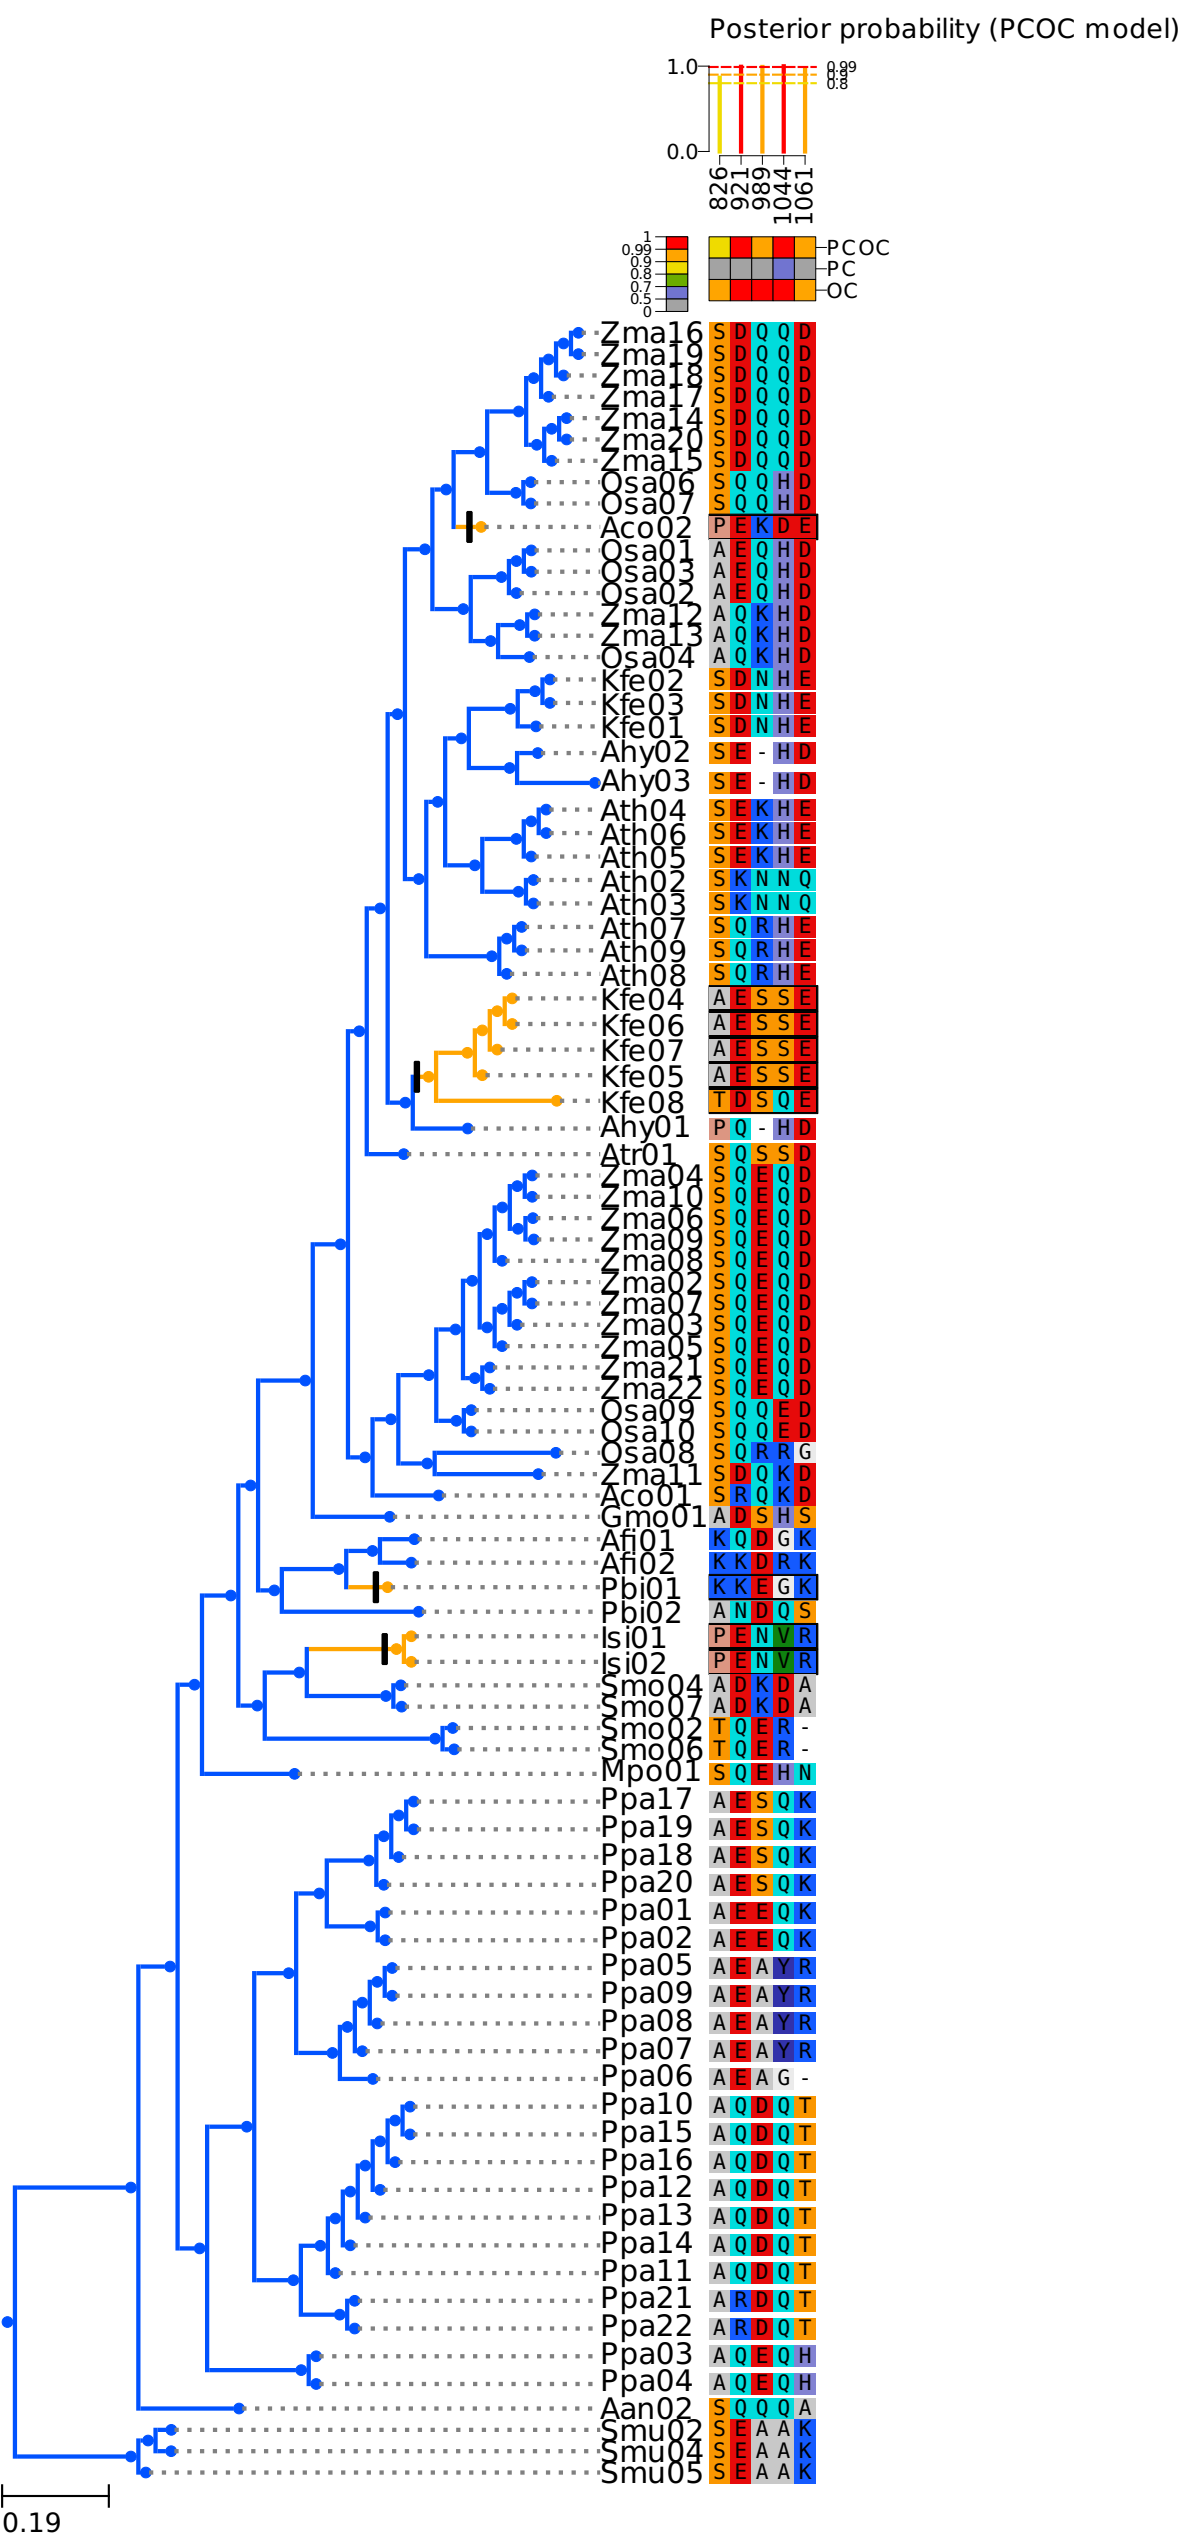

Supplement: Figure_S2.zip [file Figure_S2.zip]

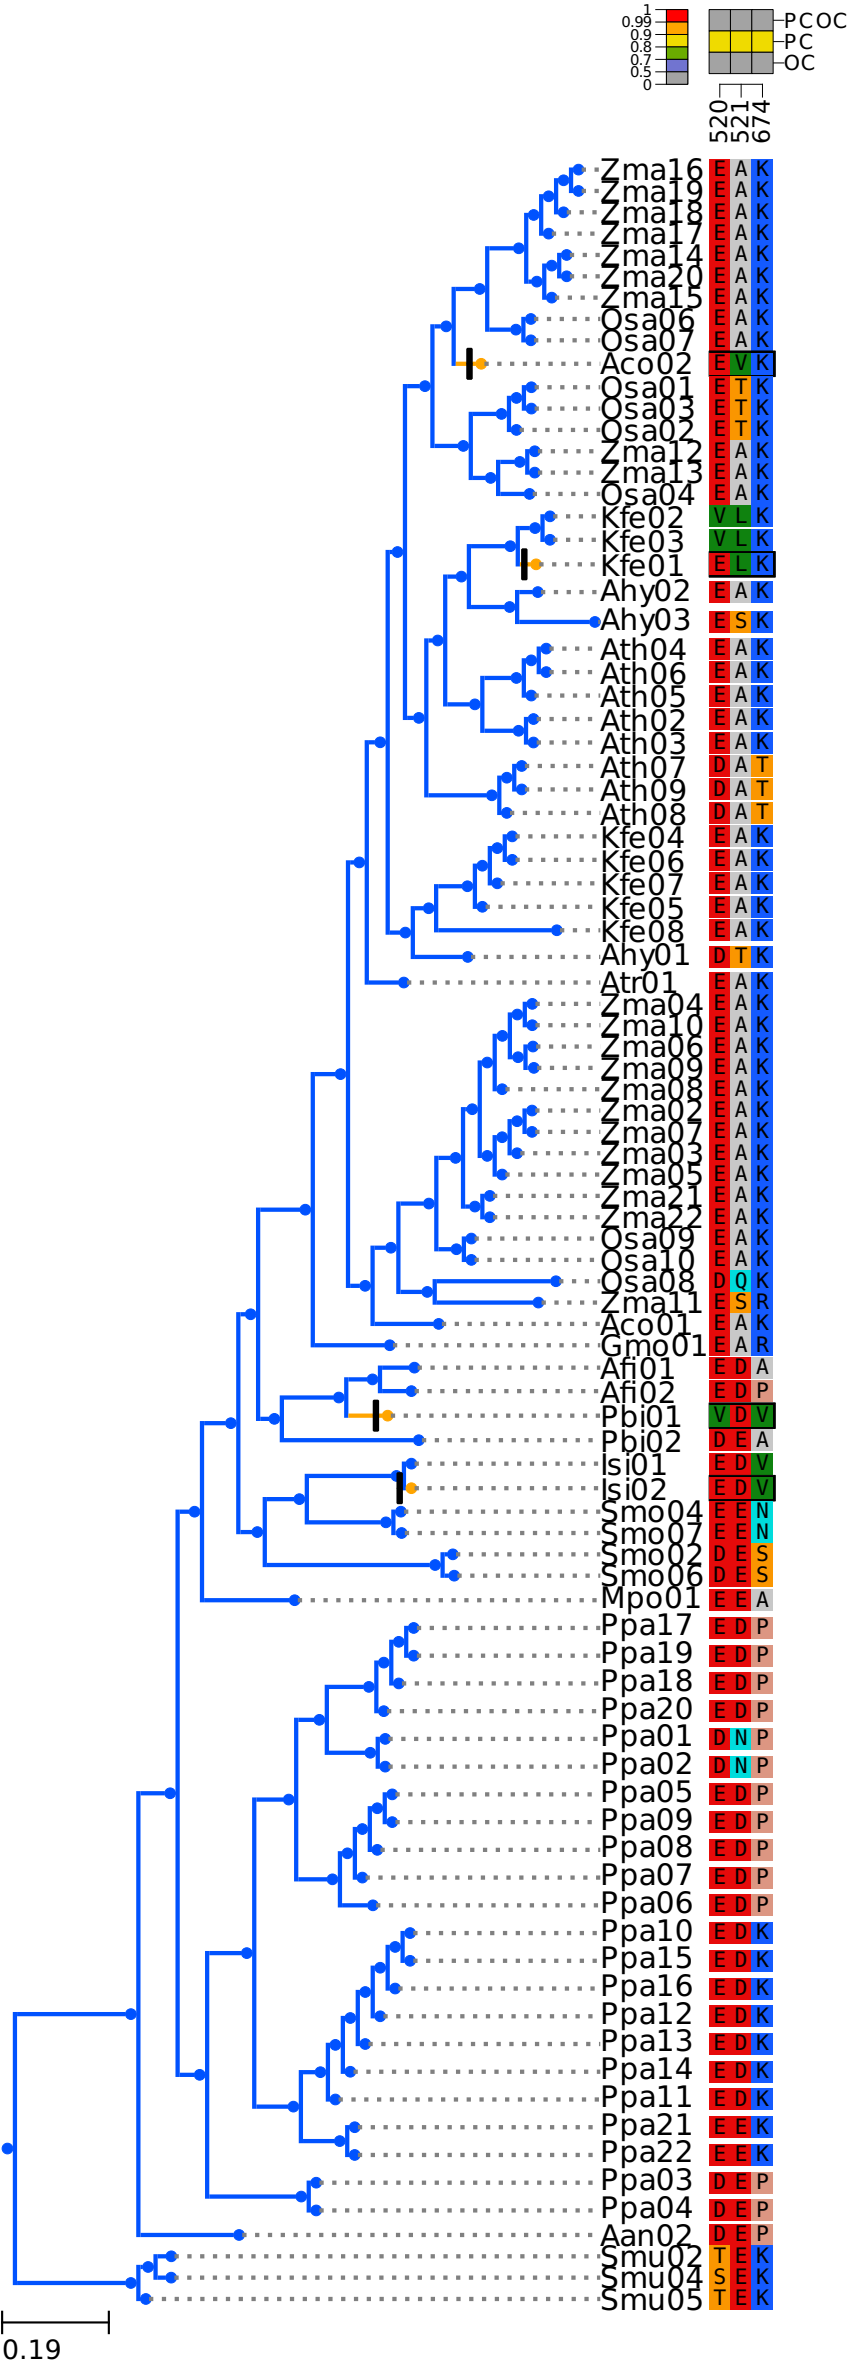

Supplement: Figure_S2.zip [file Figure_S2.zip]

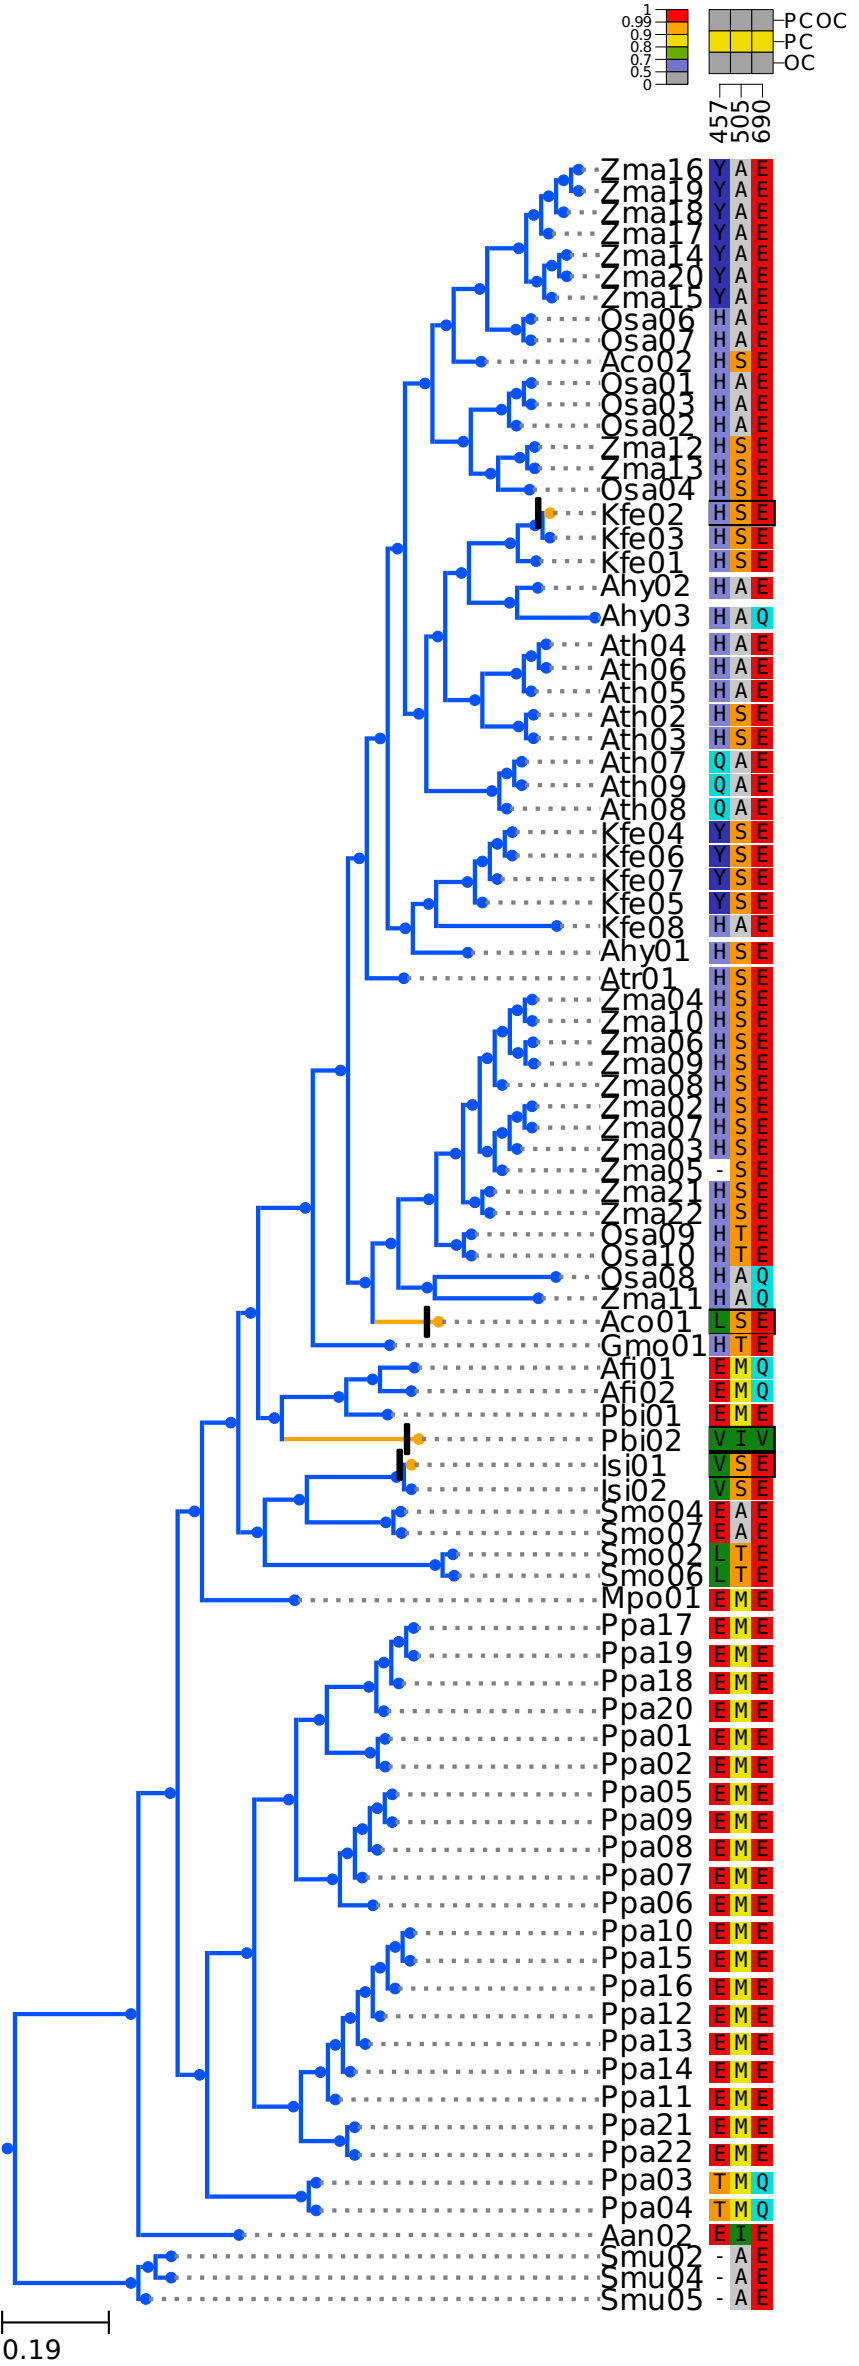

Supplement: Figure_S2.zip [file Figure_S2.zip]

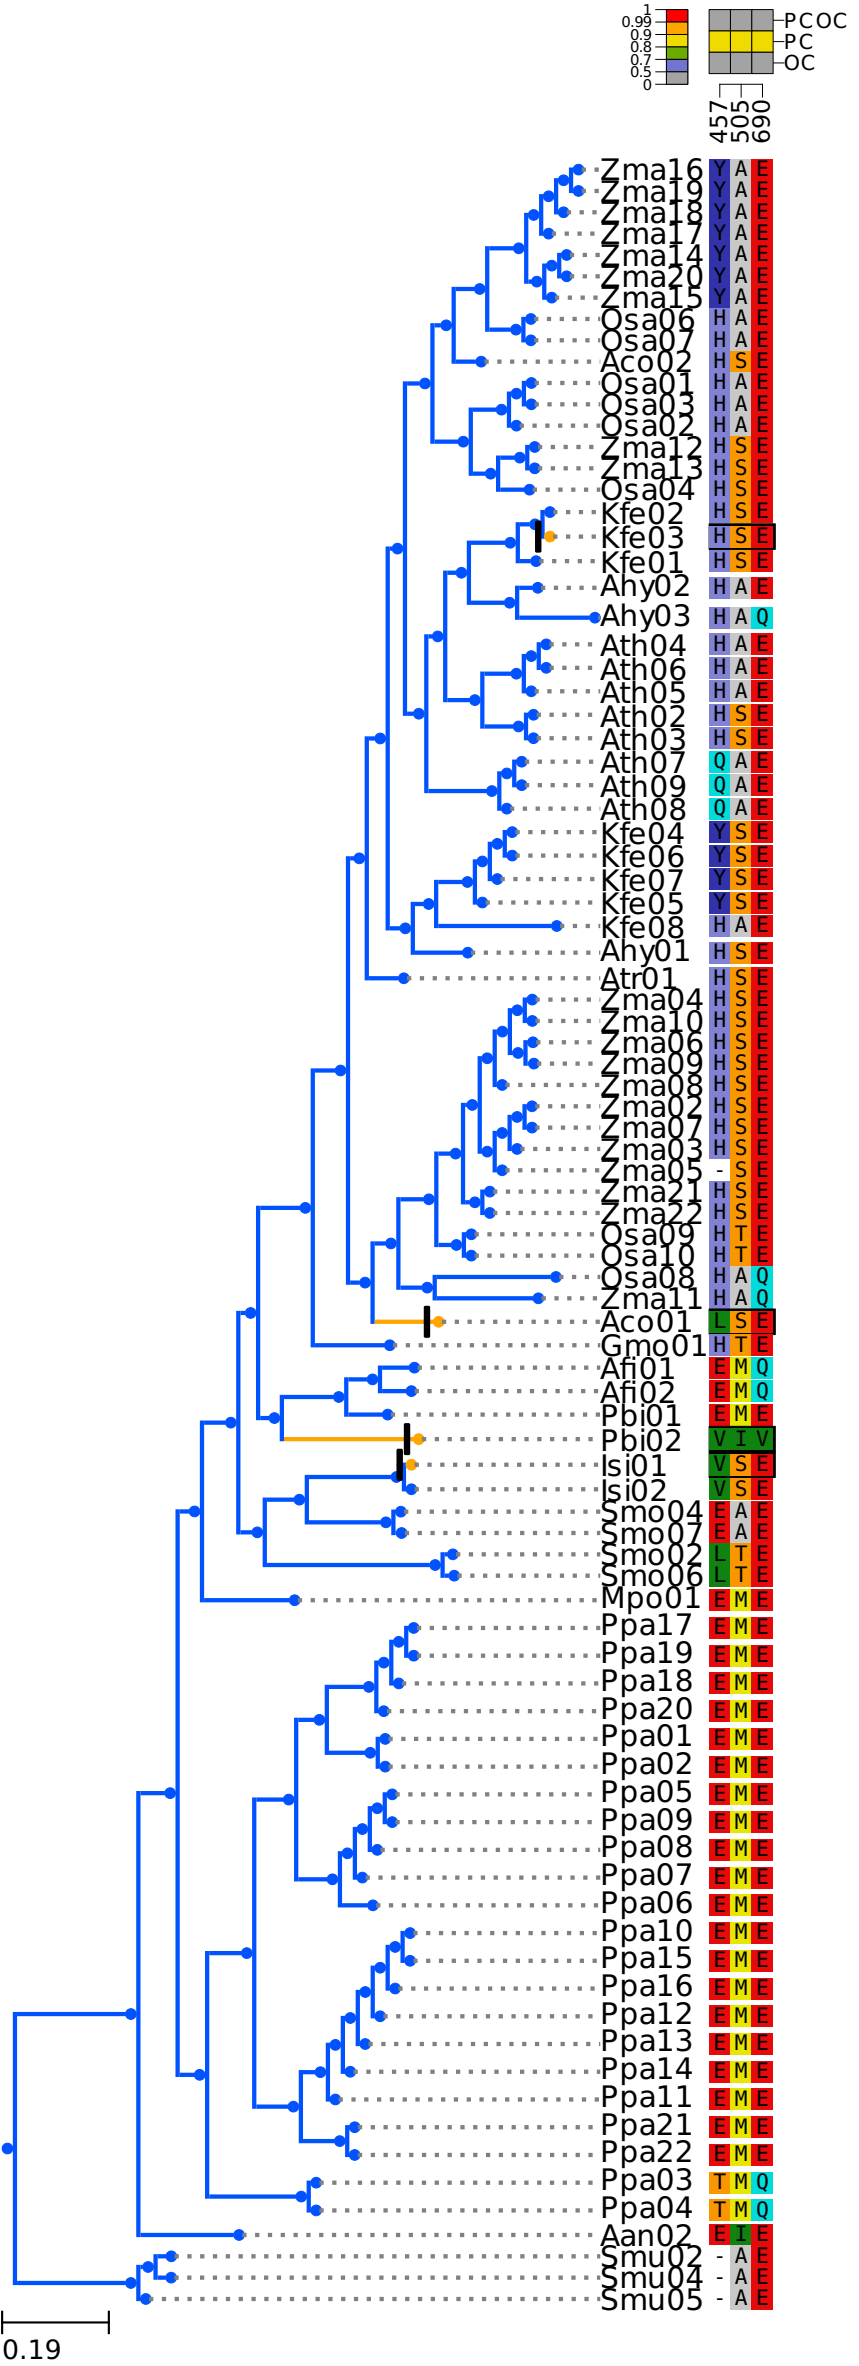

Supplement: Figure_S2.zip [file Figure_S2.zip]

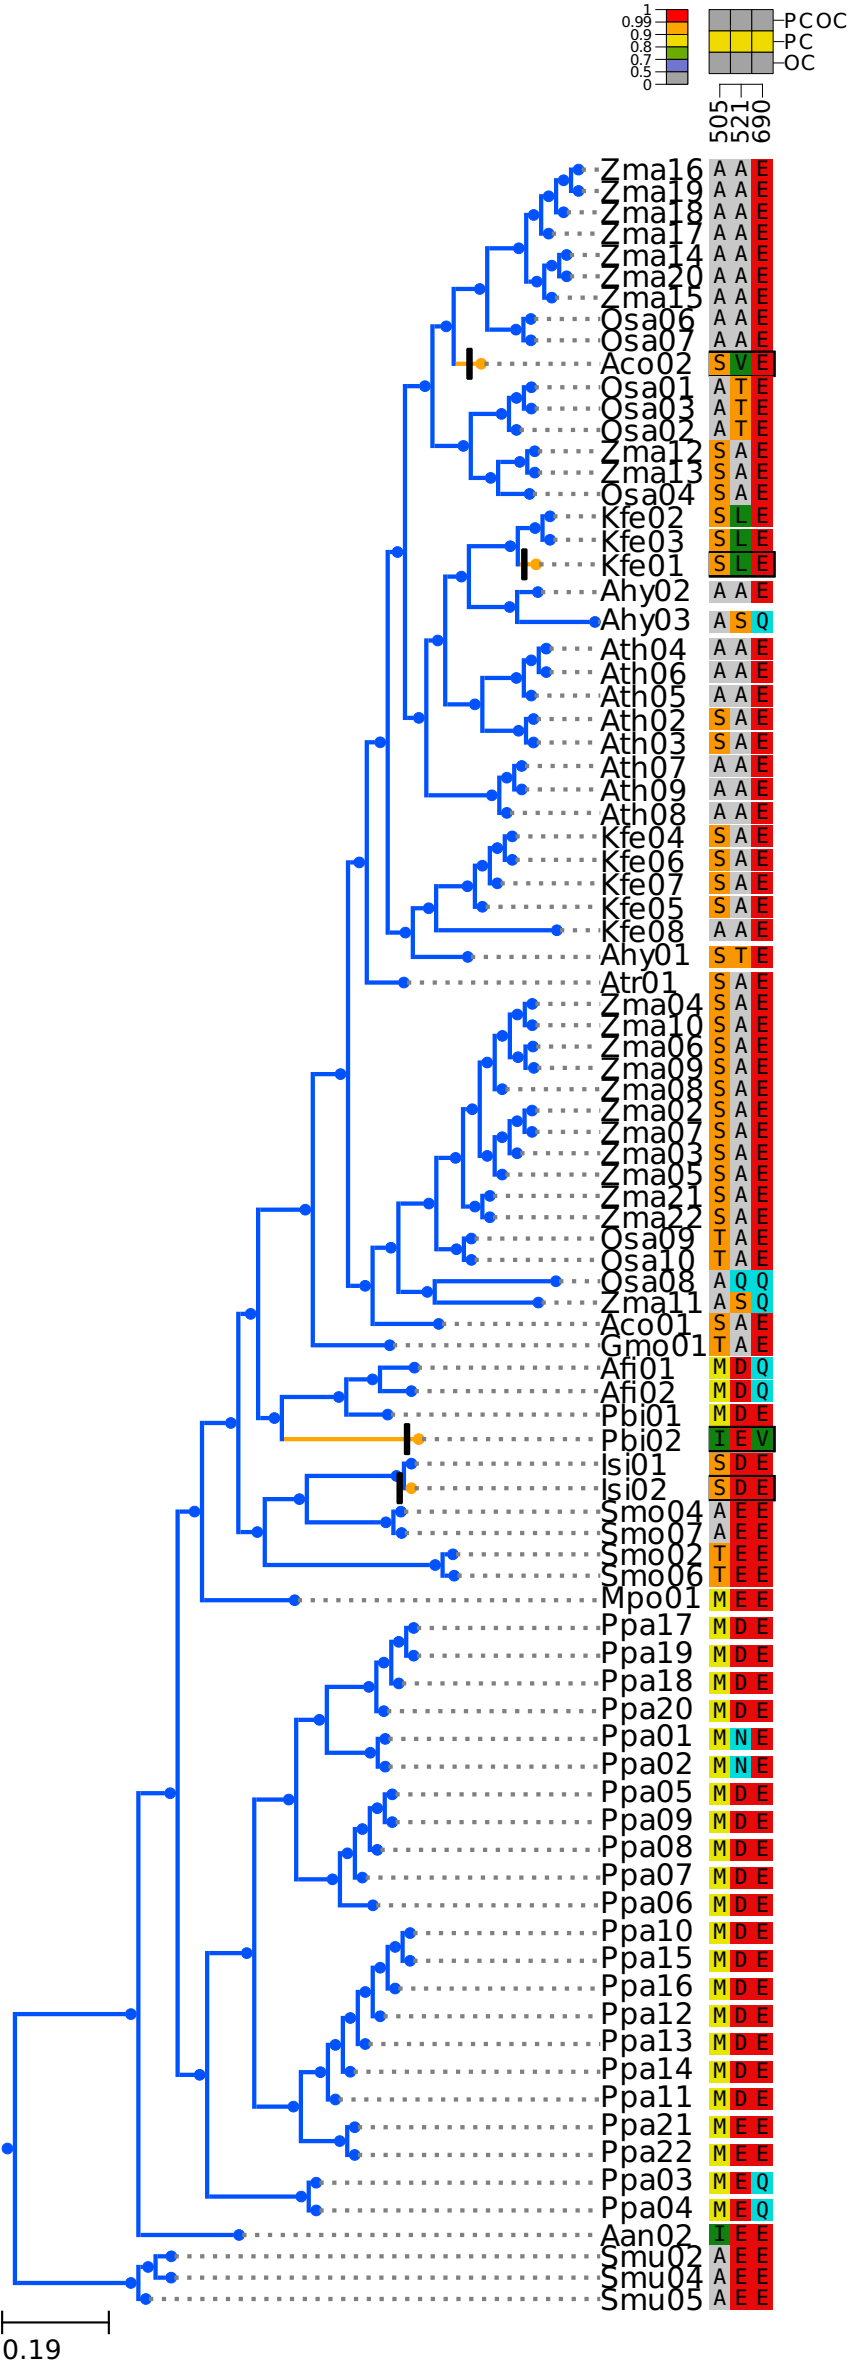

Supplement: Figure_S2.zip [file Figure_S2.zip]

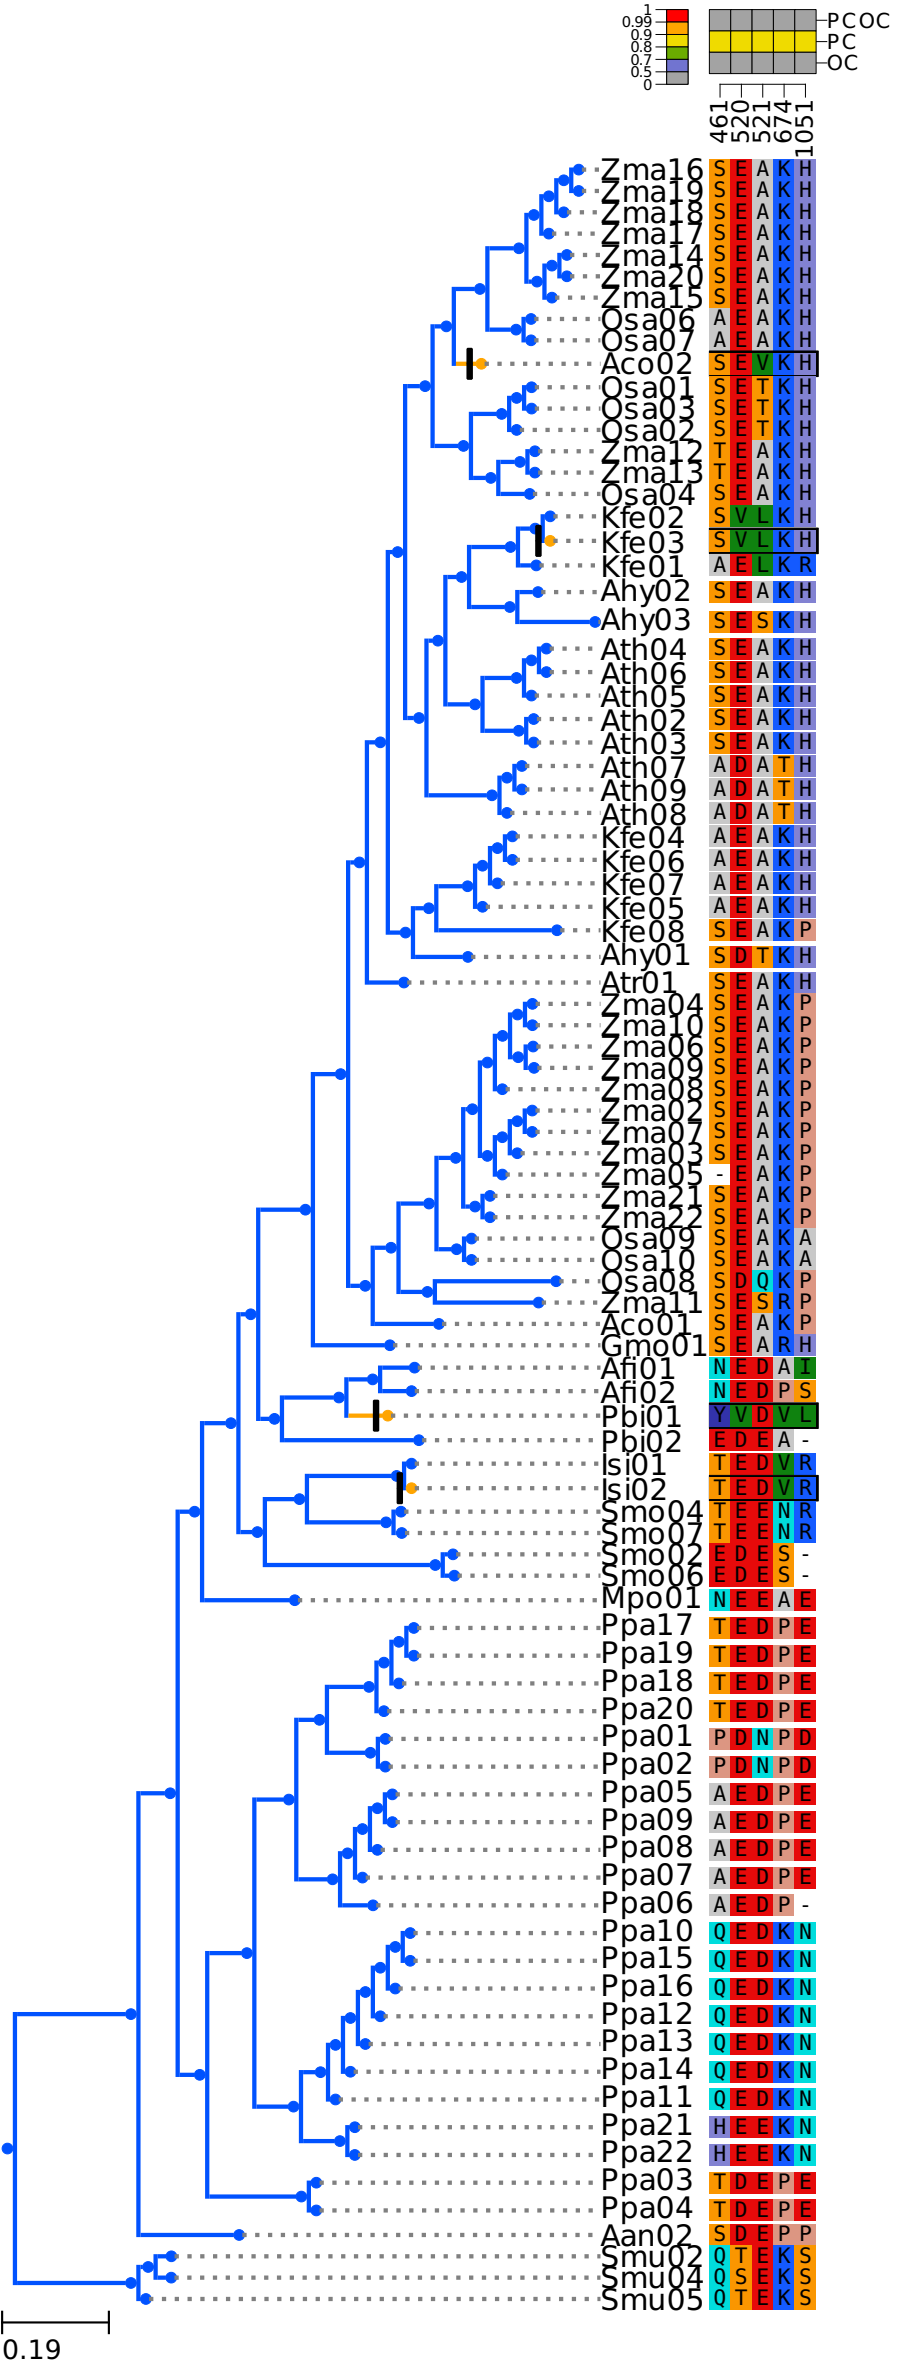

Supplement: Figure_S2.zip [file Figure_S2.zip]

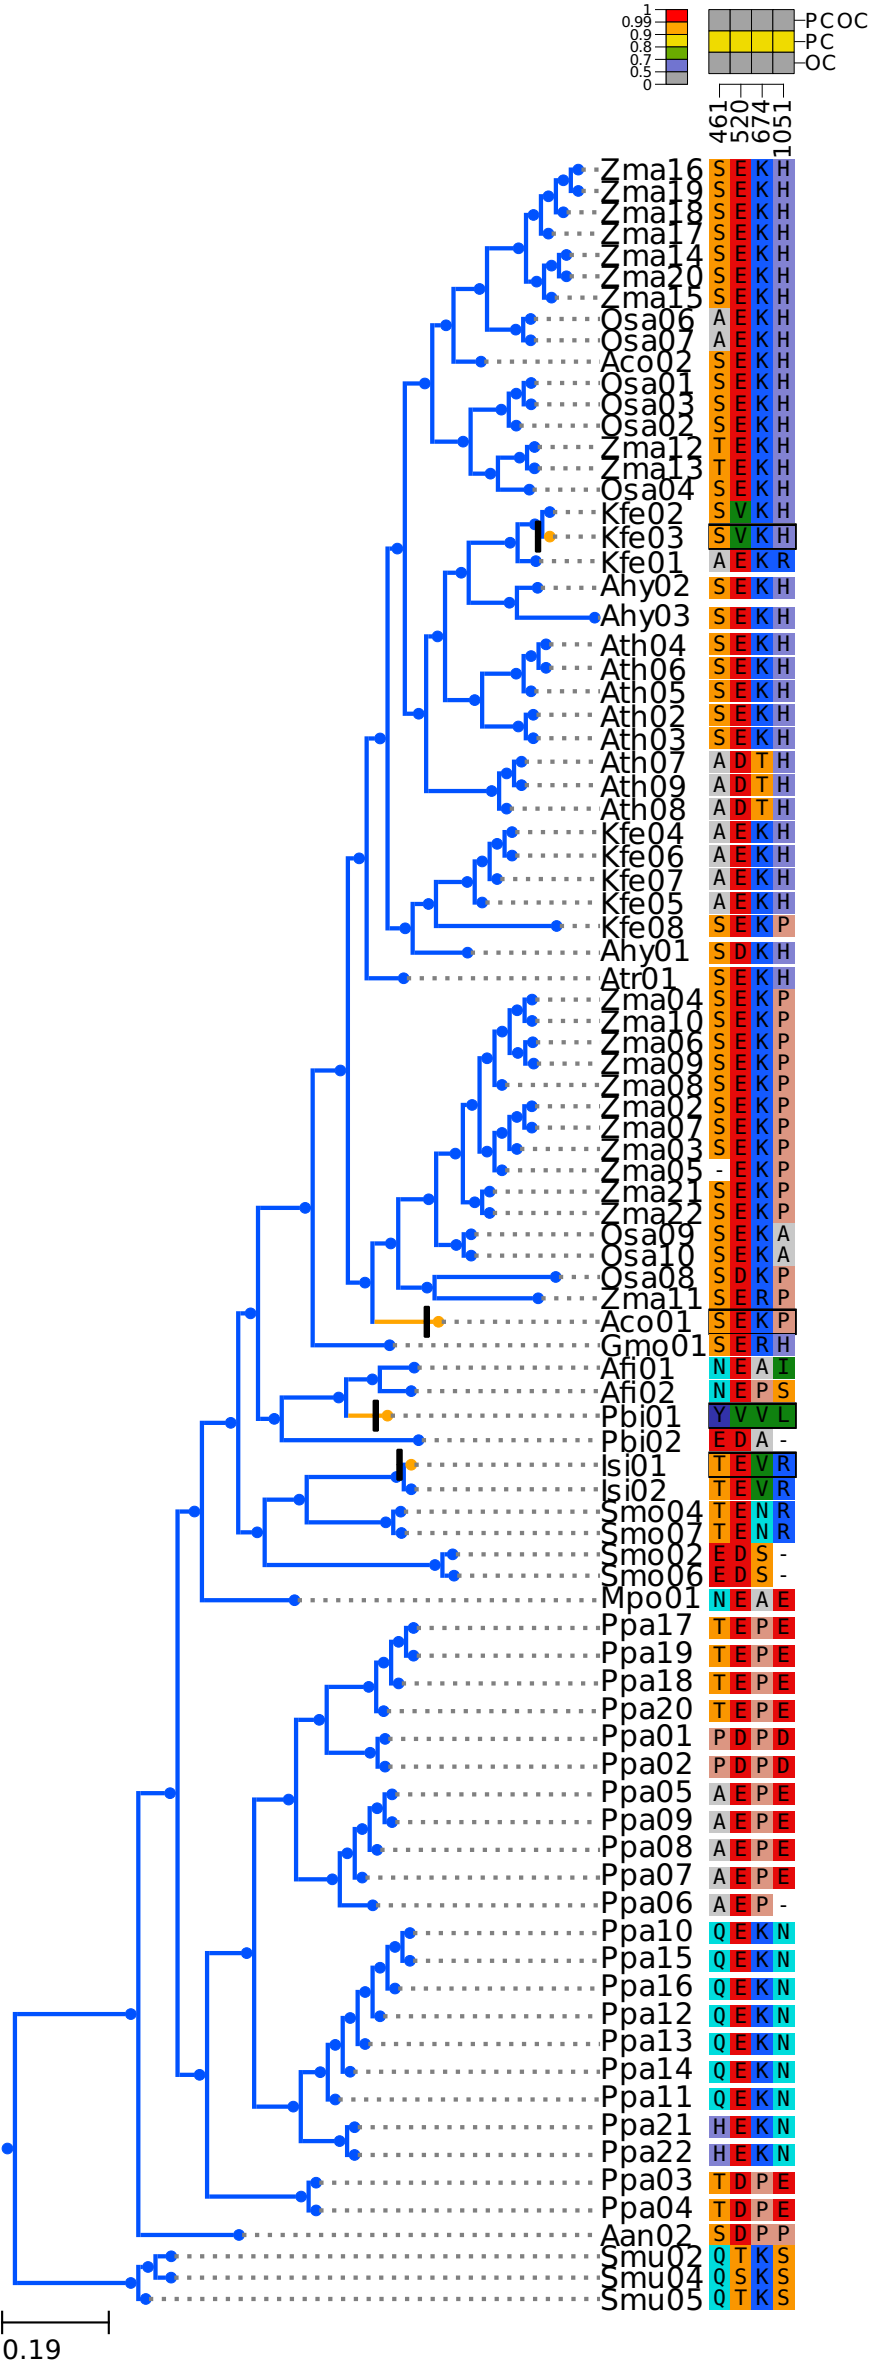

Supplement: Figure_S2.zip [file Figure_S2.zip]

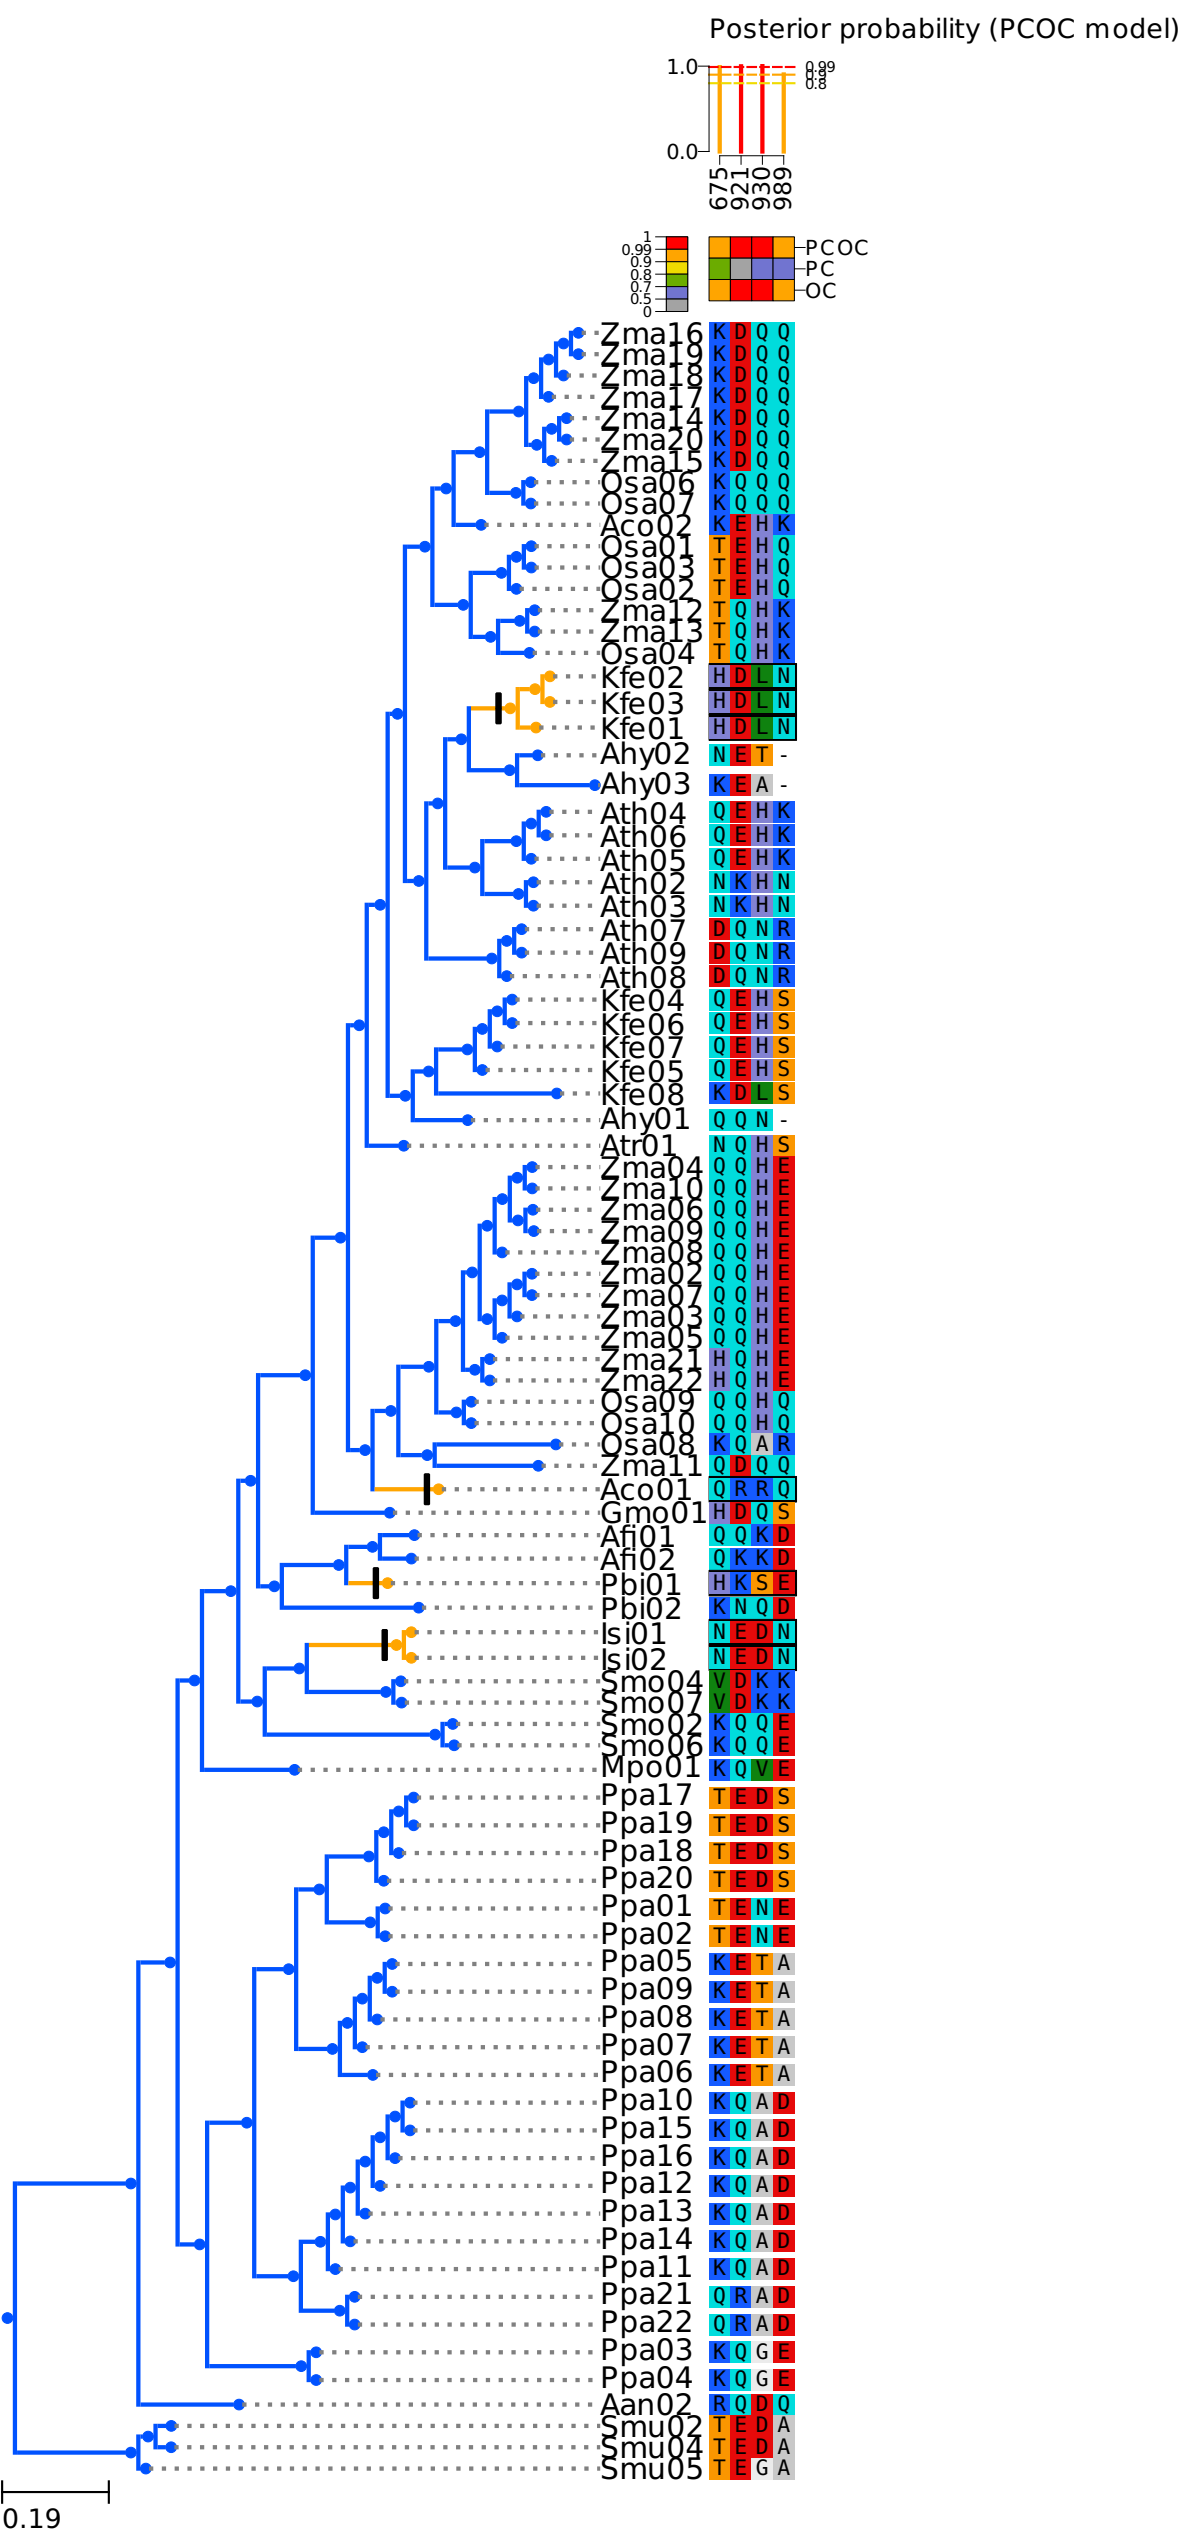

Supplement: Figure_S2.zip [file Figure_S2.zip]

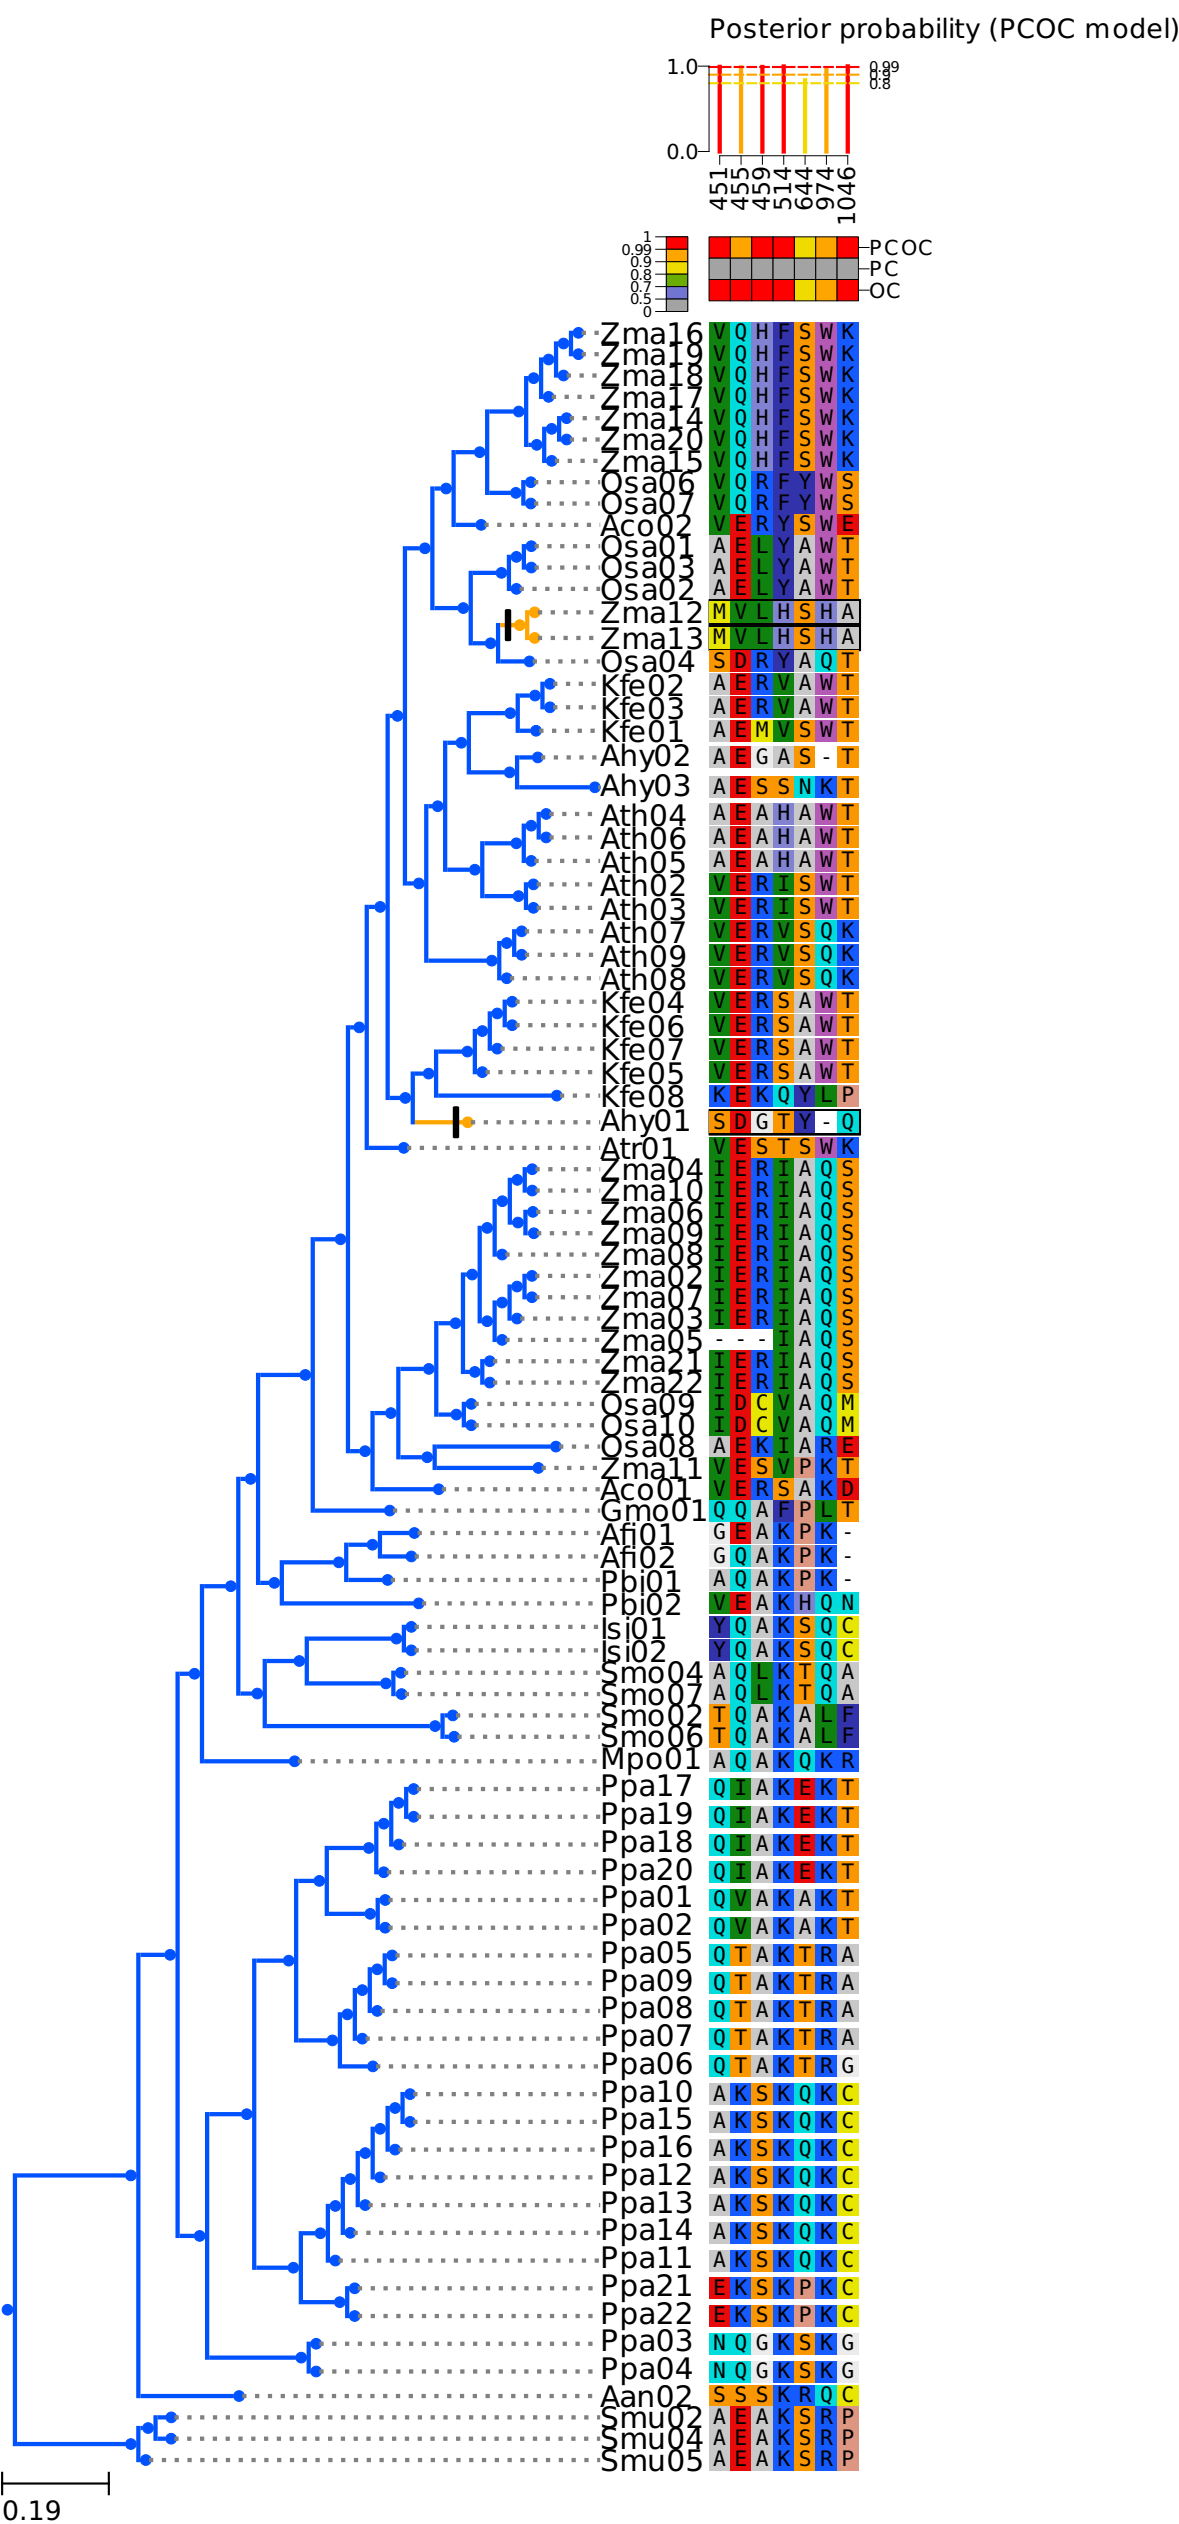

Supplement: Figure_S2.zip [file Figure_S2.zip]

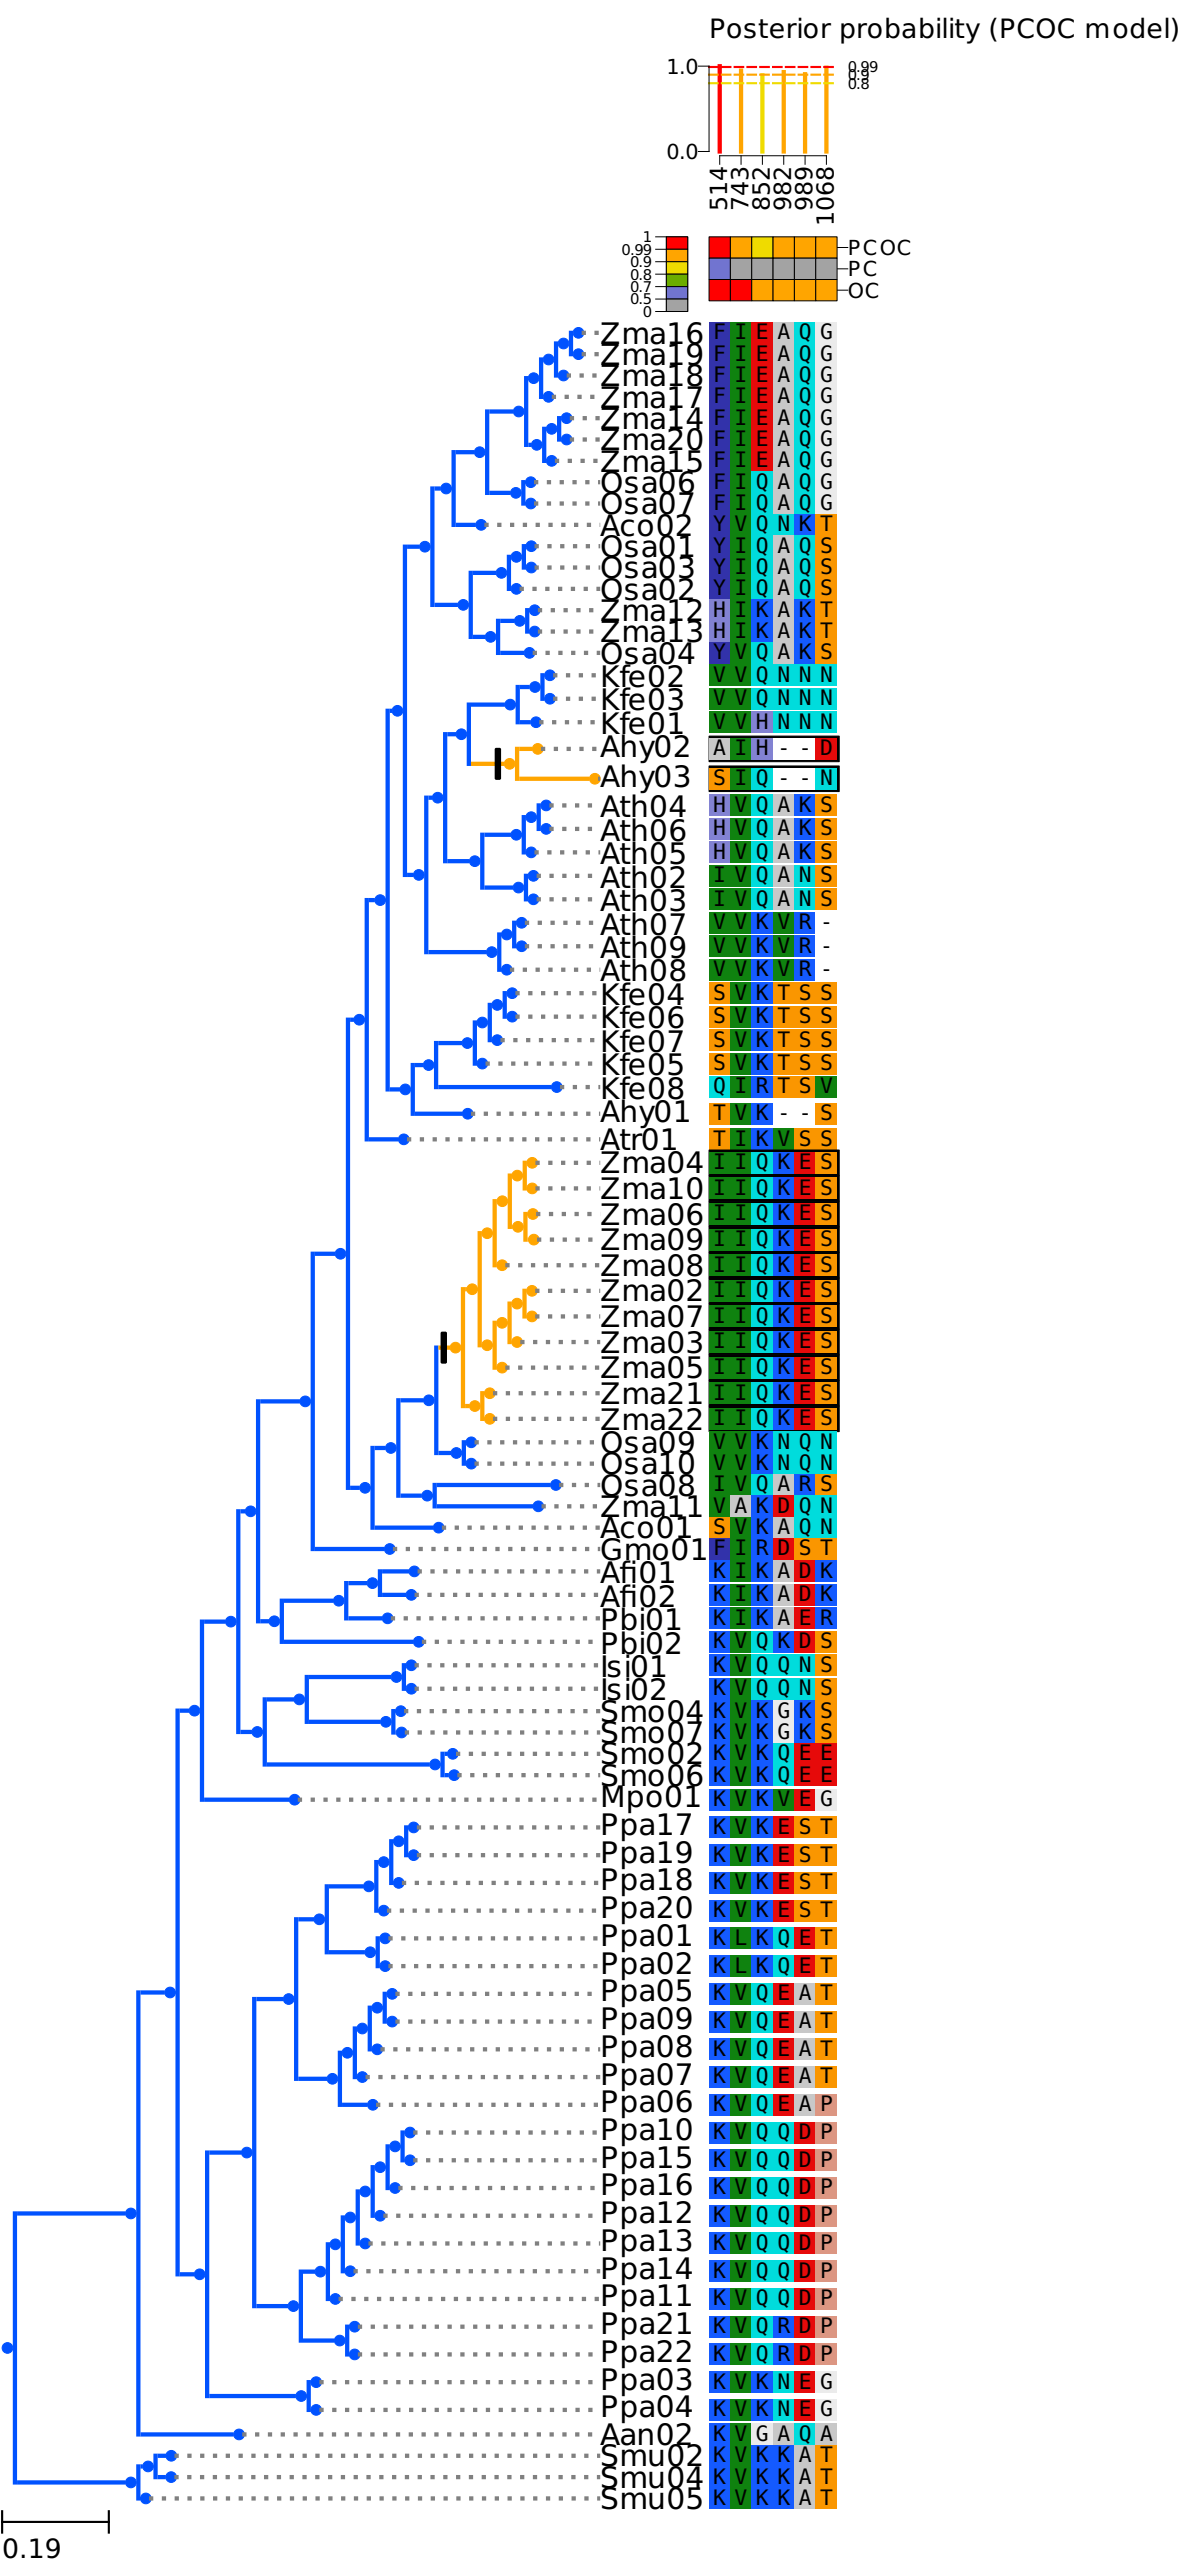

Supplement: Figure_S2.zip [file Figure_S2.zip]

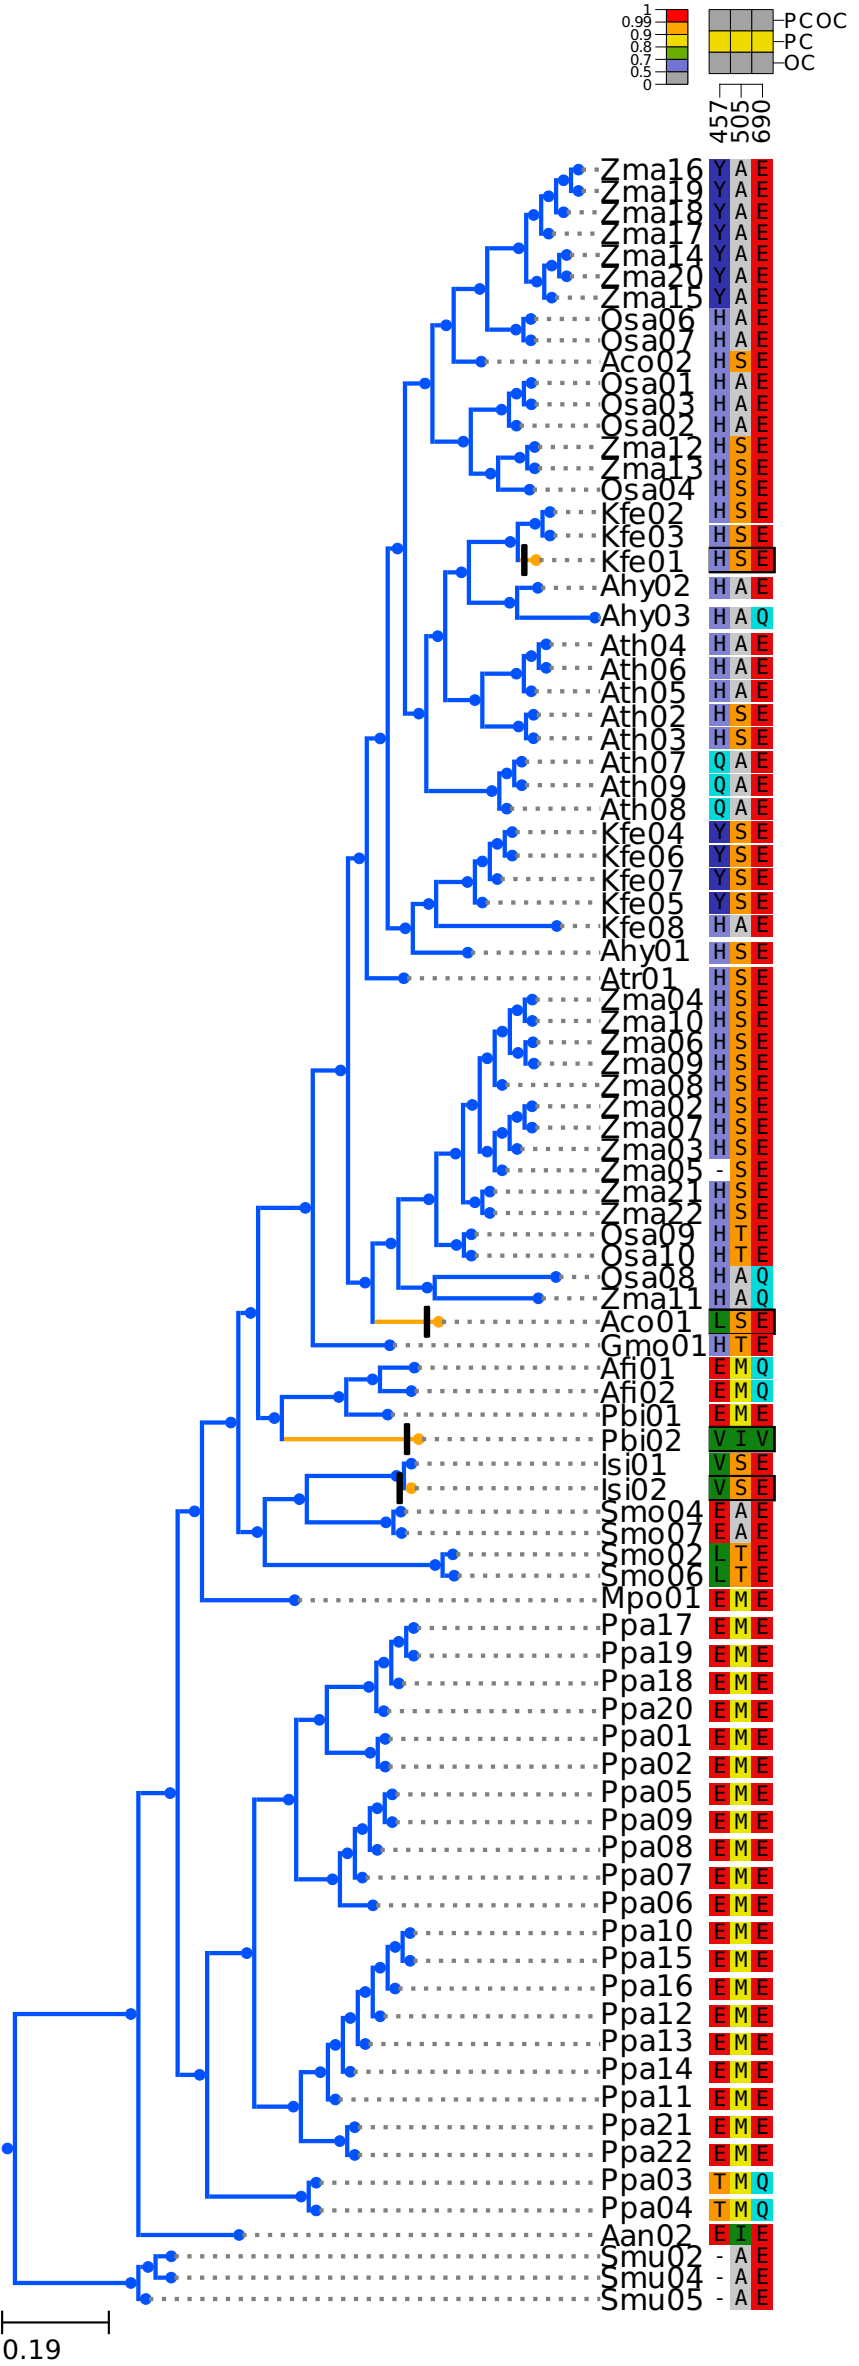

Supplement: Figure_S2.zip [file Figure_S2.zip]

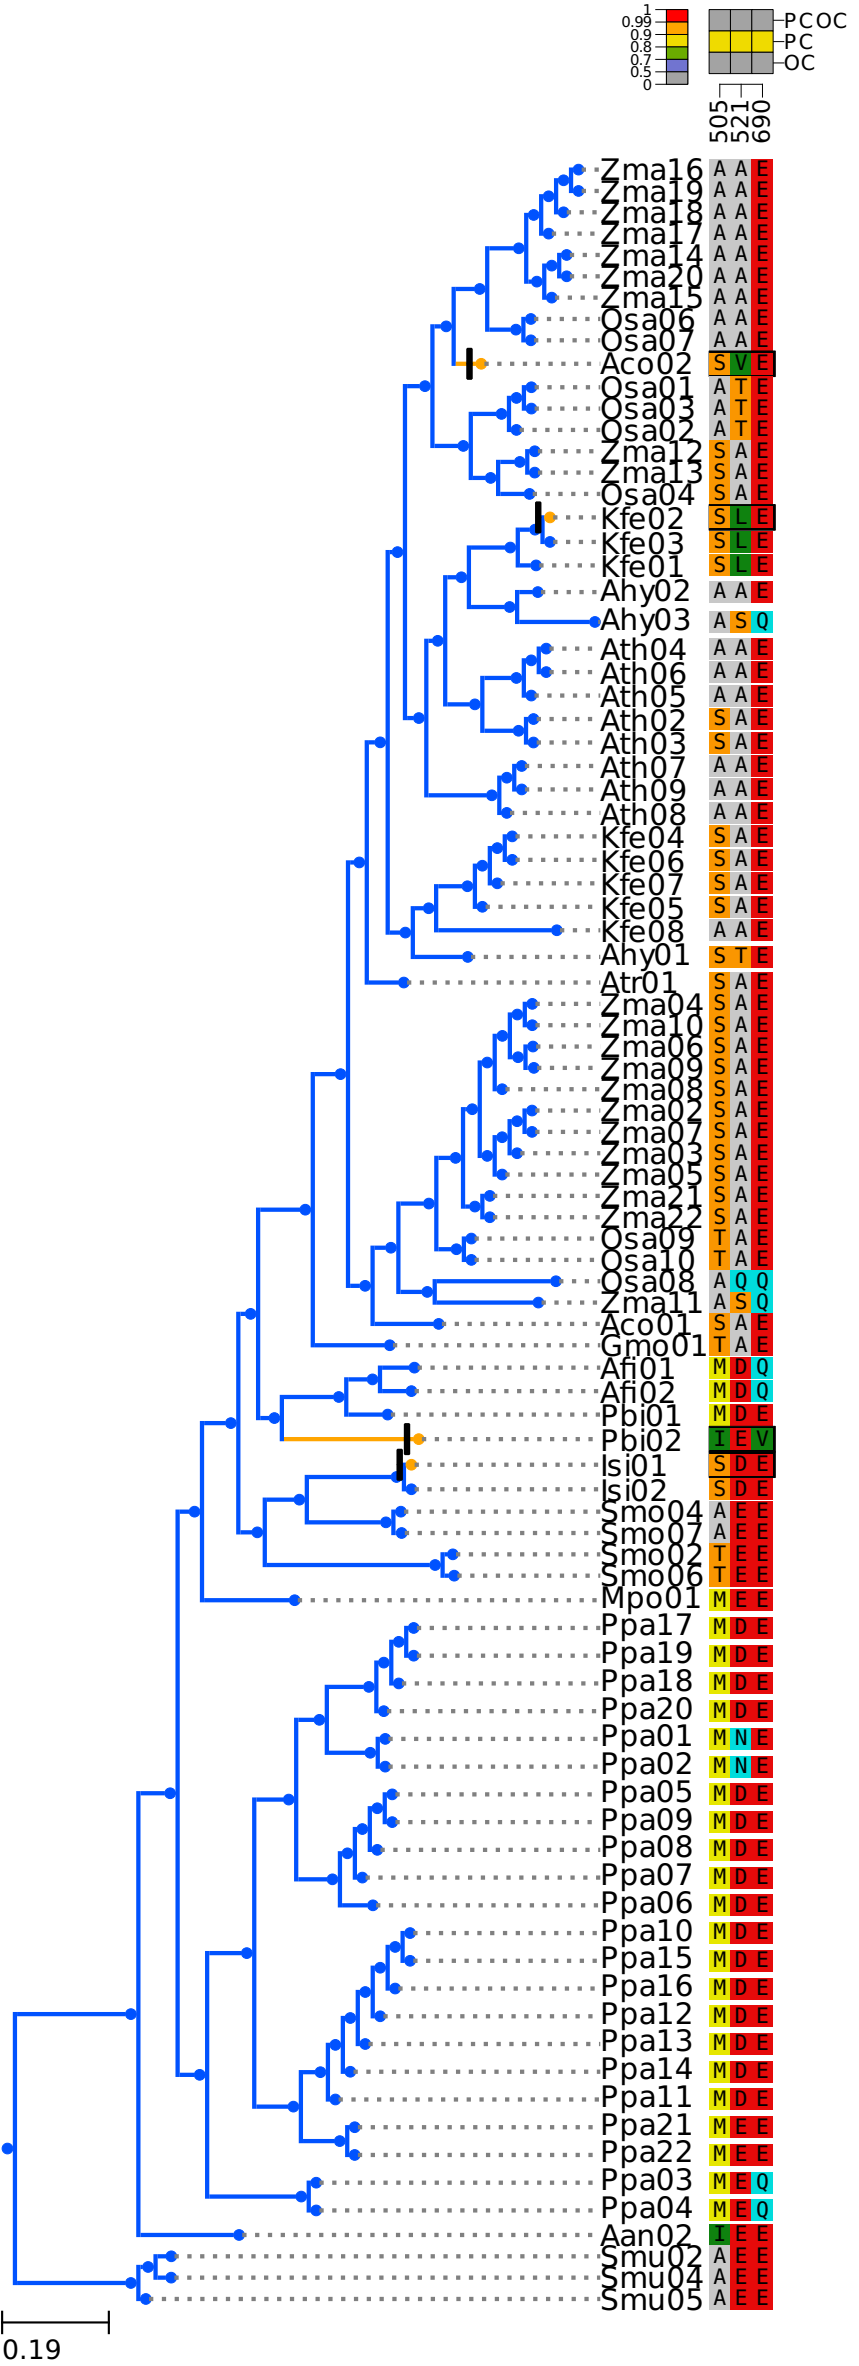

Supplement: Figure_S2.zip [file Figure_S2.zip]

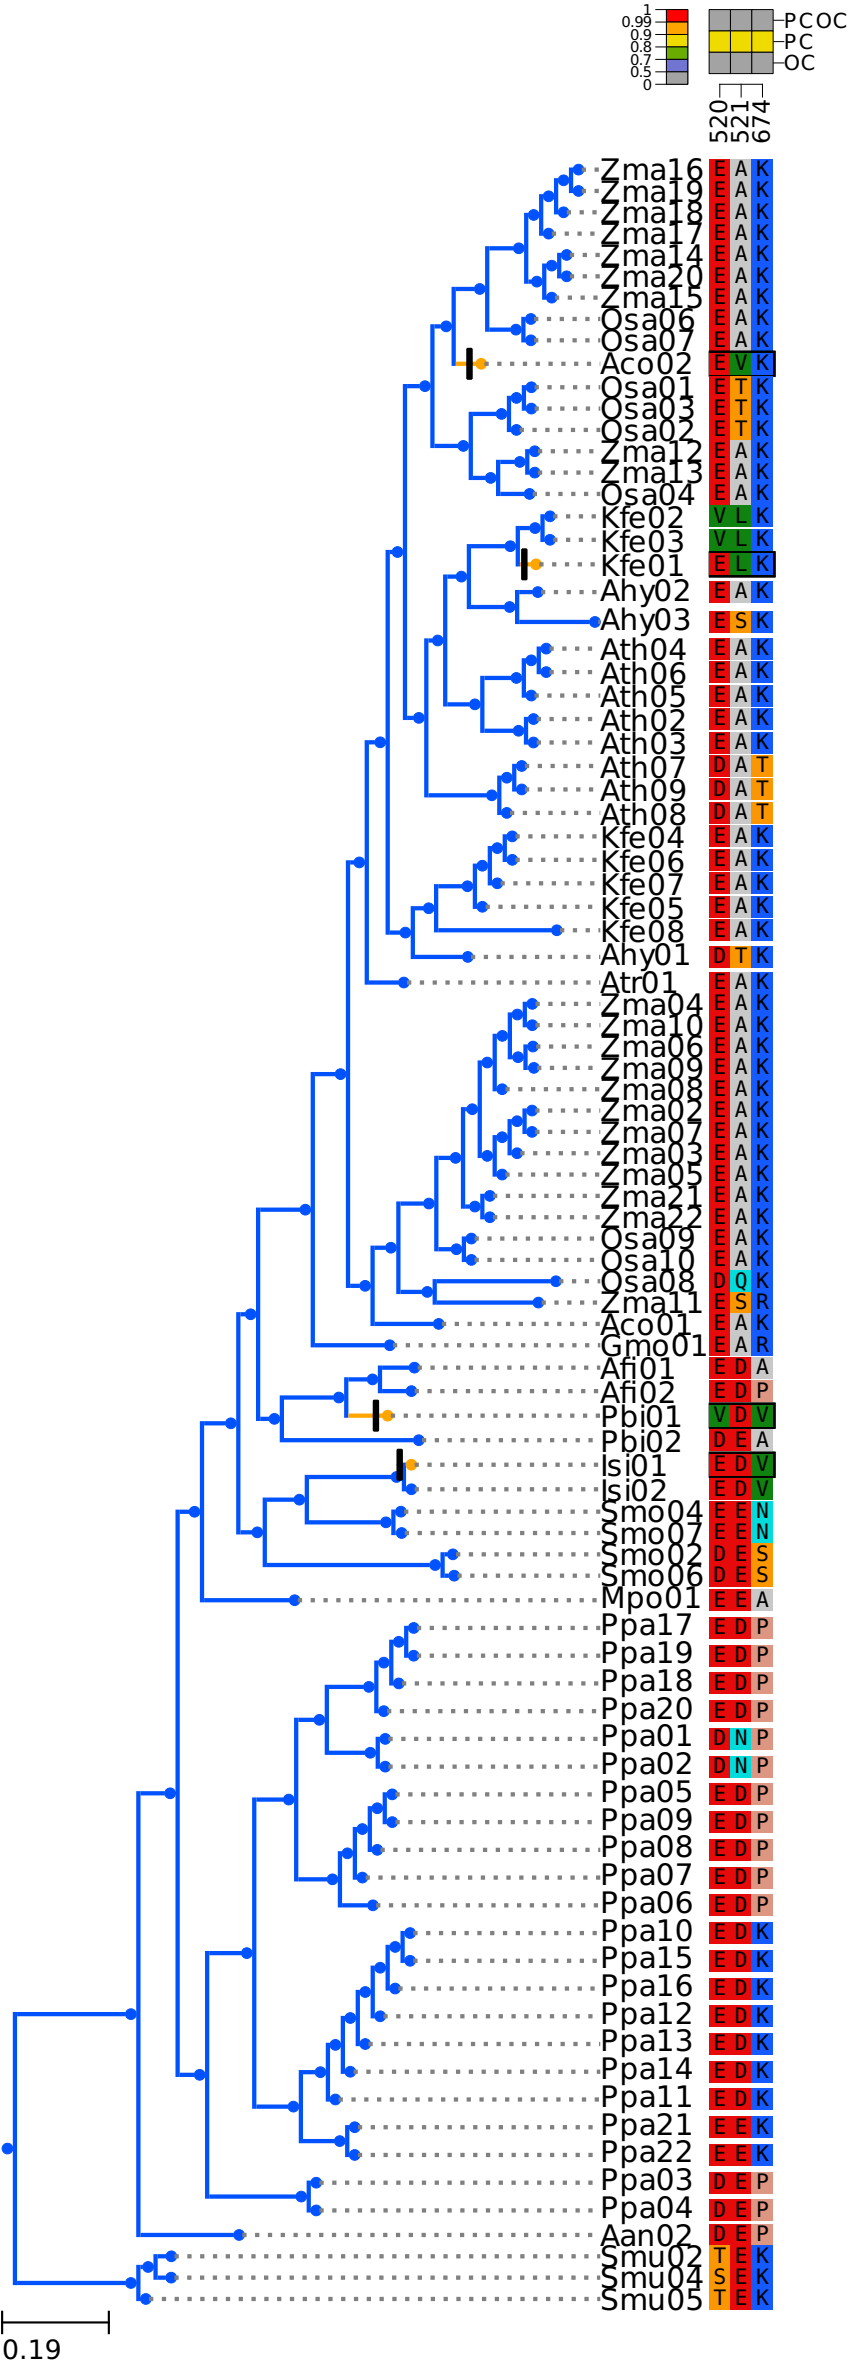

Supplement: Figure_S2.zip [file Figure_S2.zip]

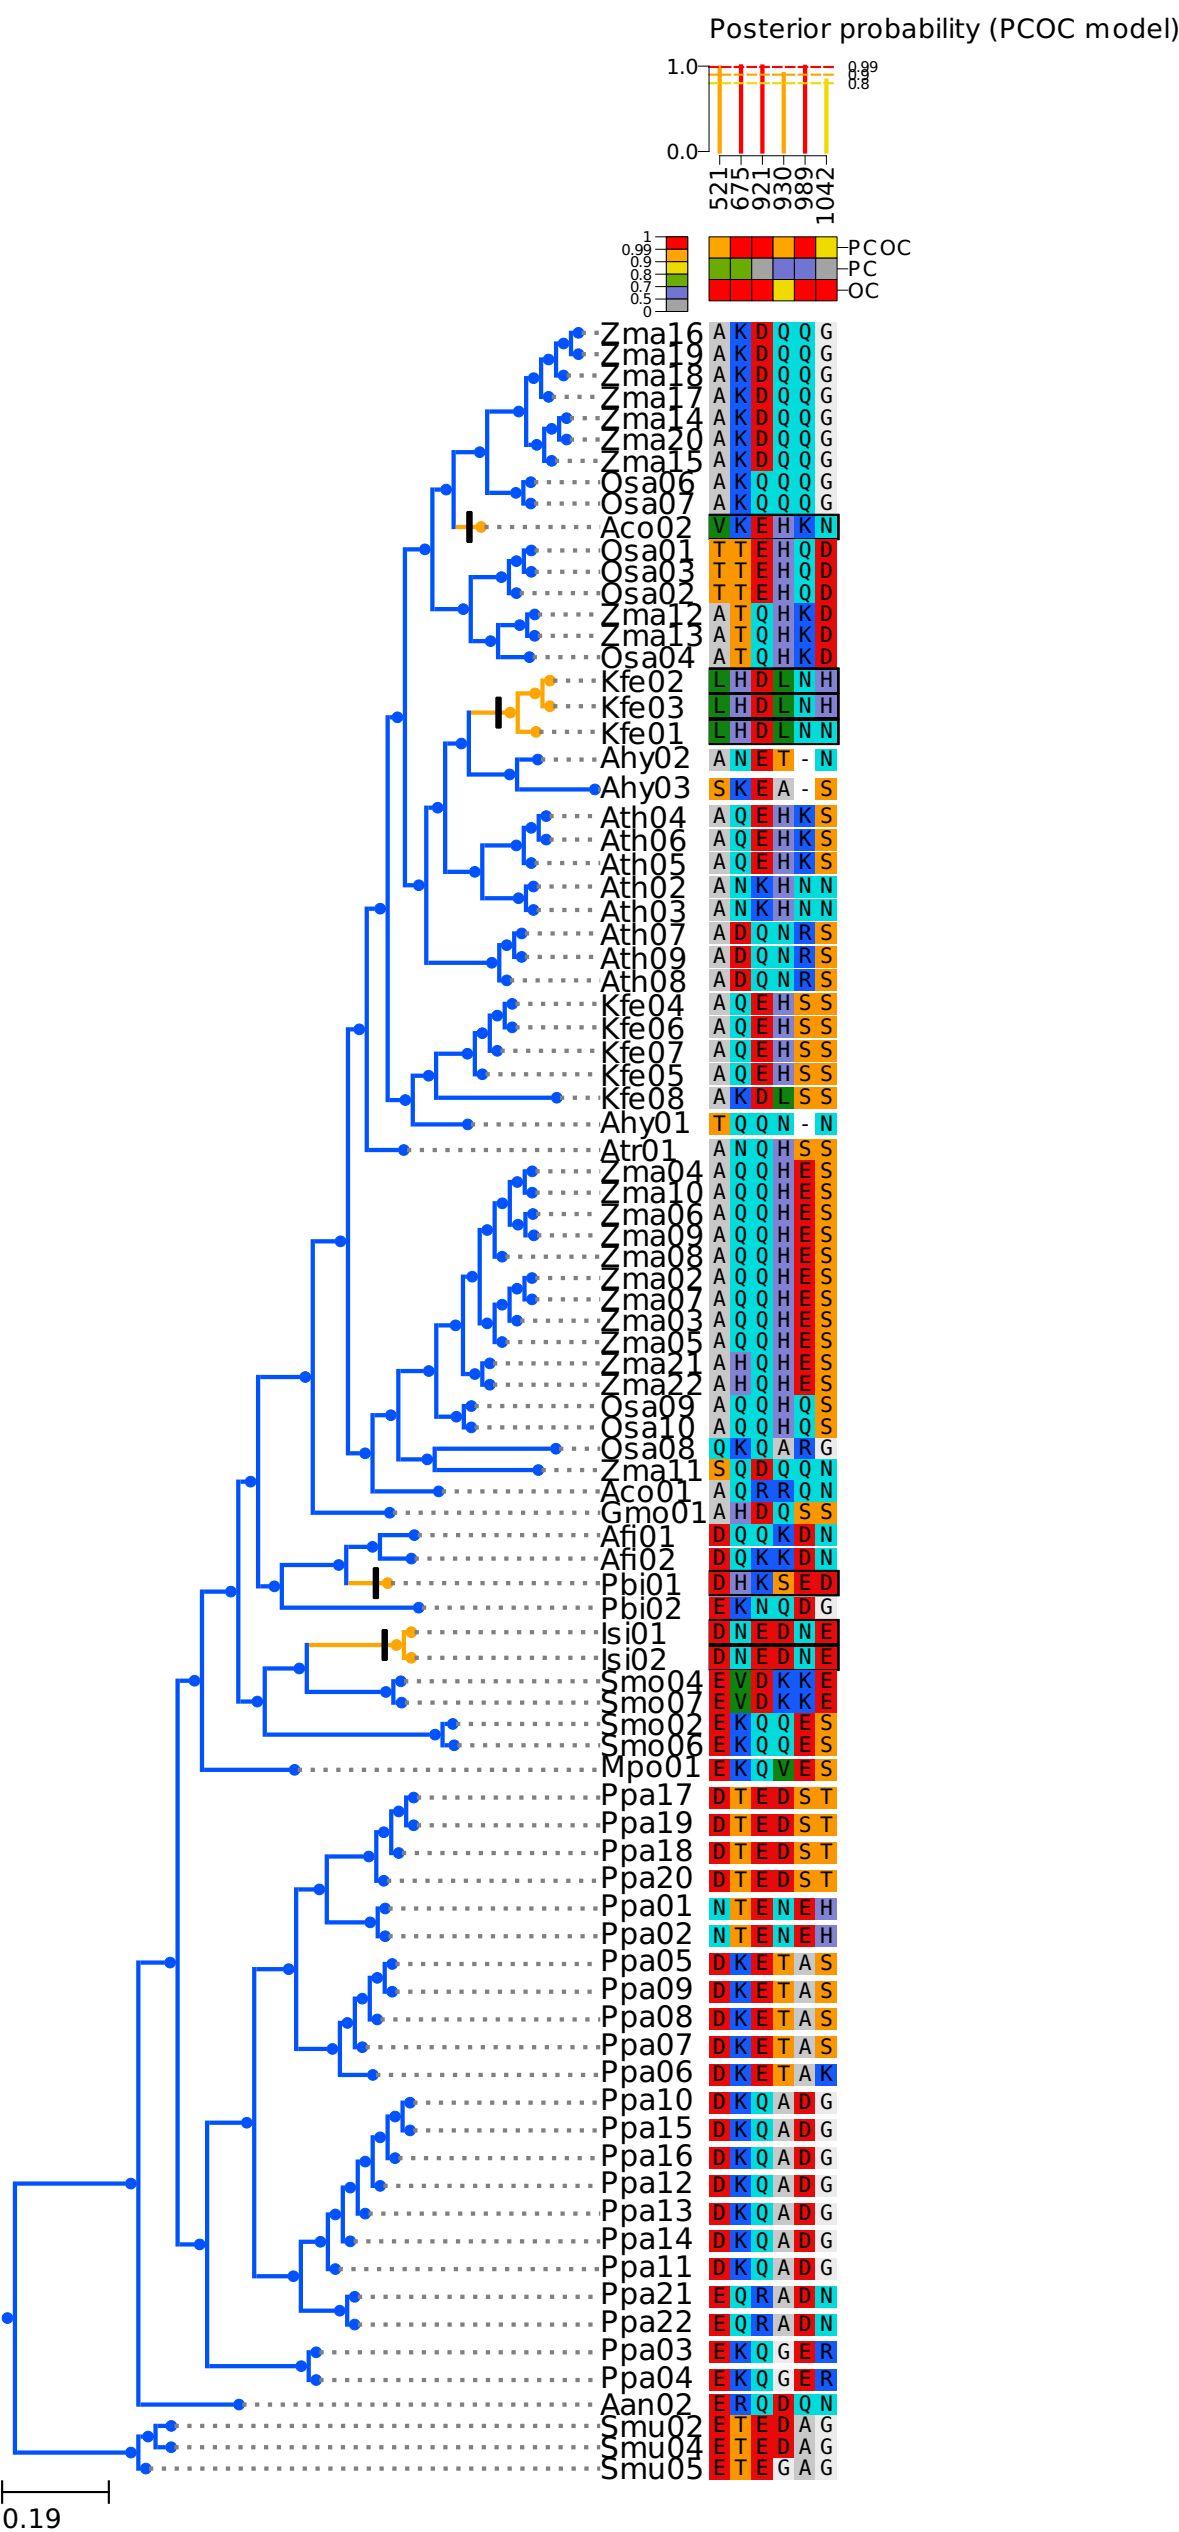

Supplement: Figure_S2.zip [file Figure_S2.zip]

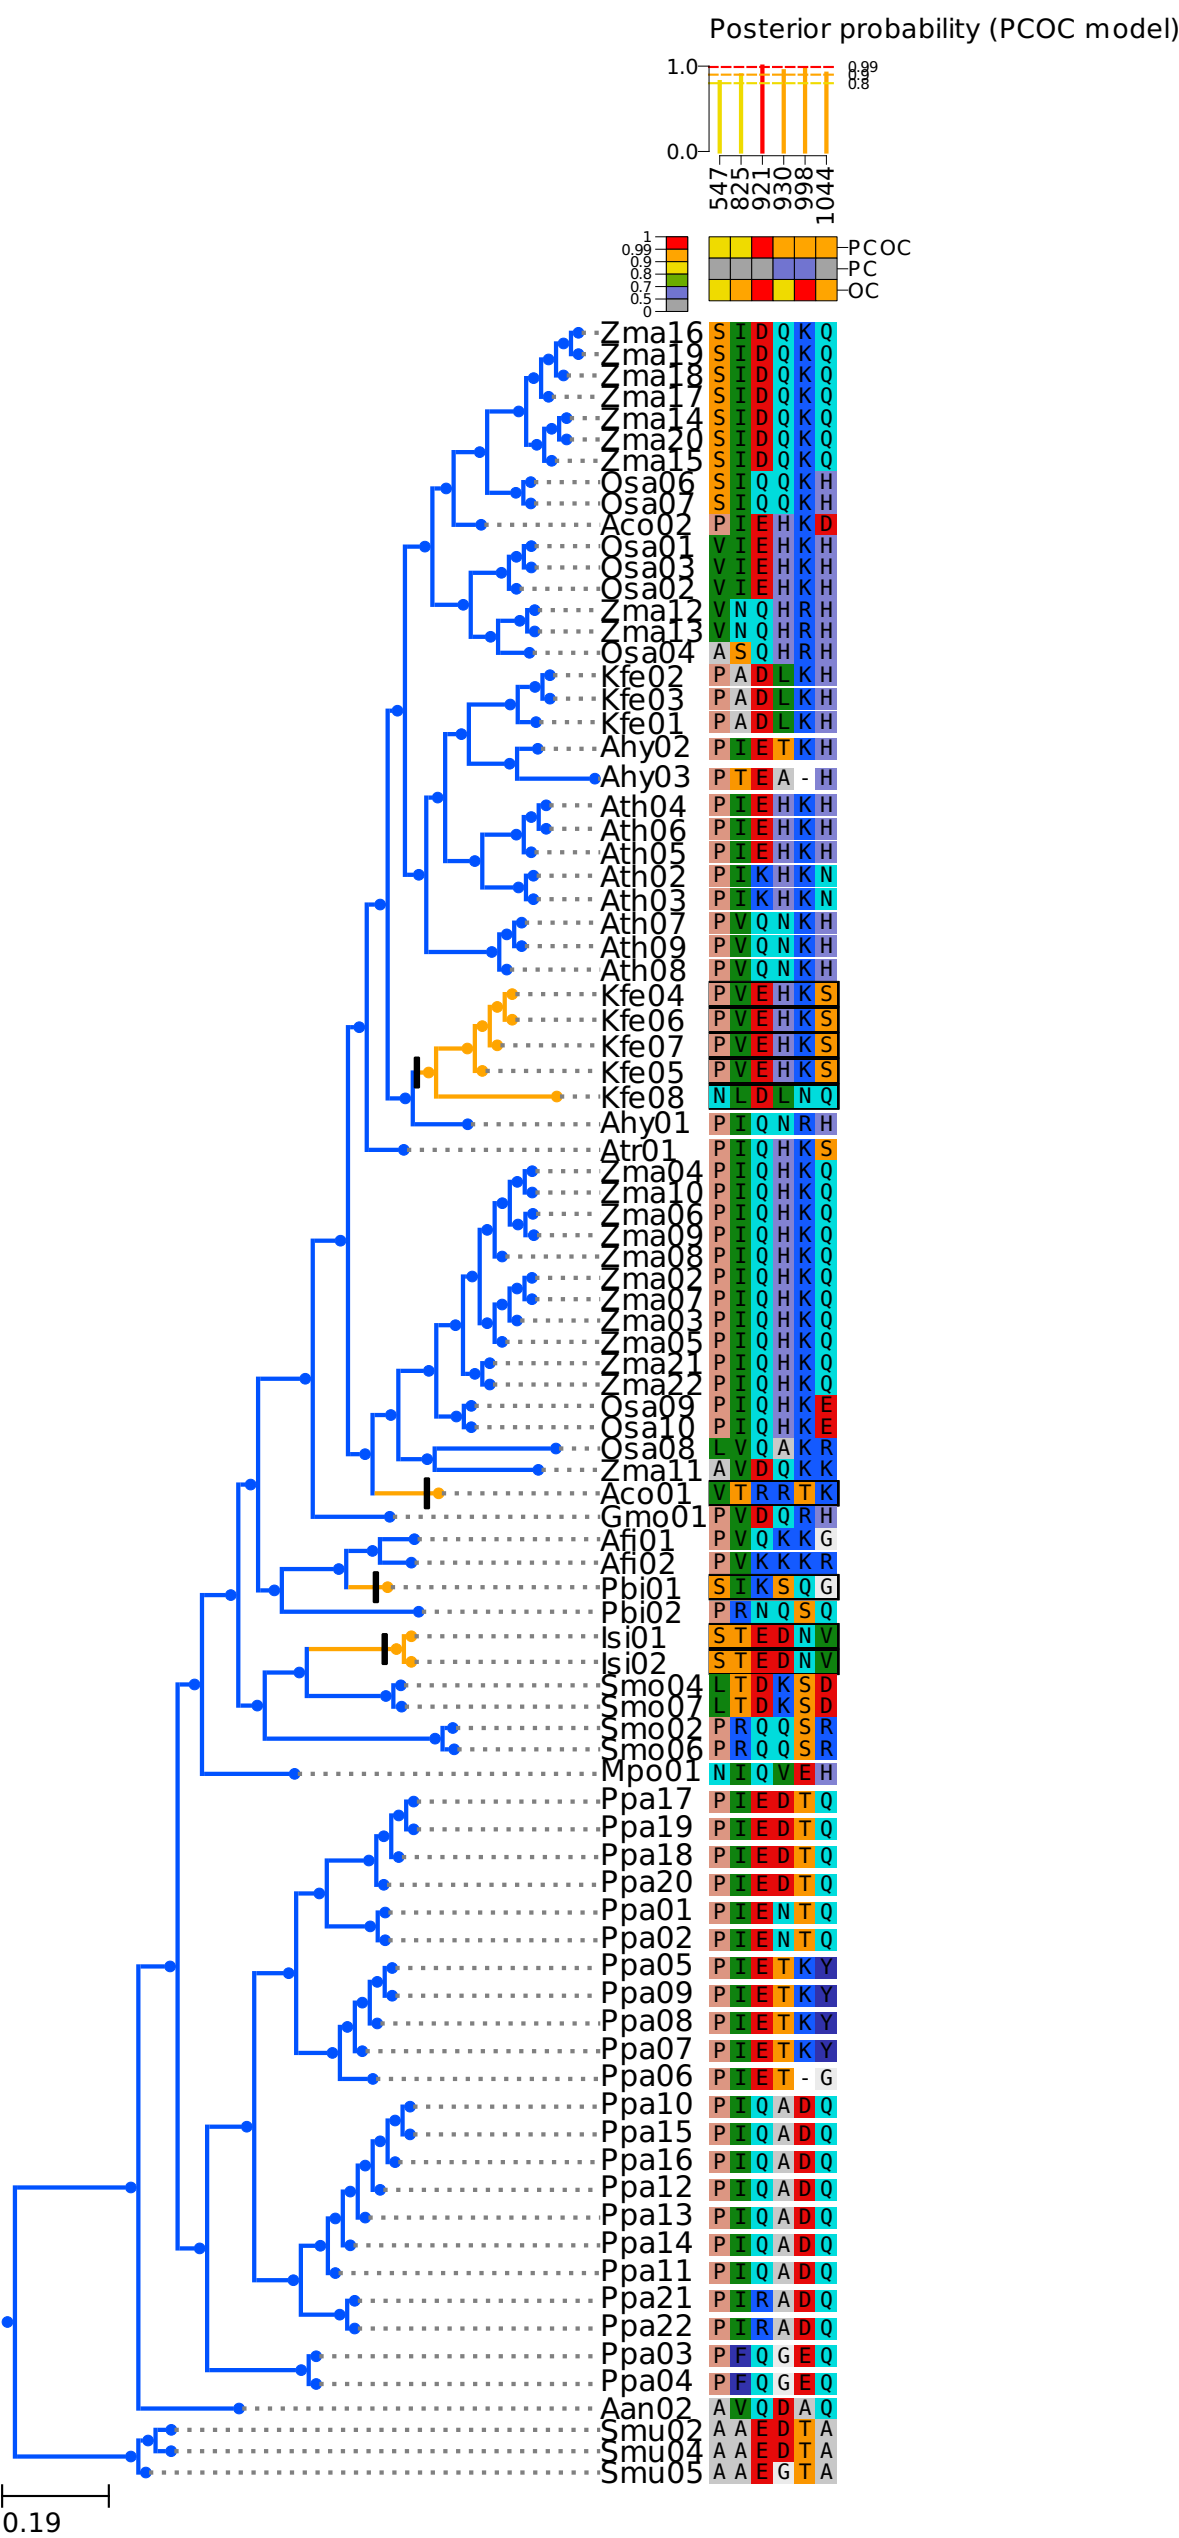

Supplement: Figure_S2.zip [file Figure_S2.zip]

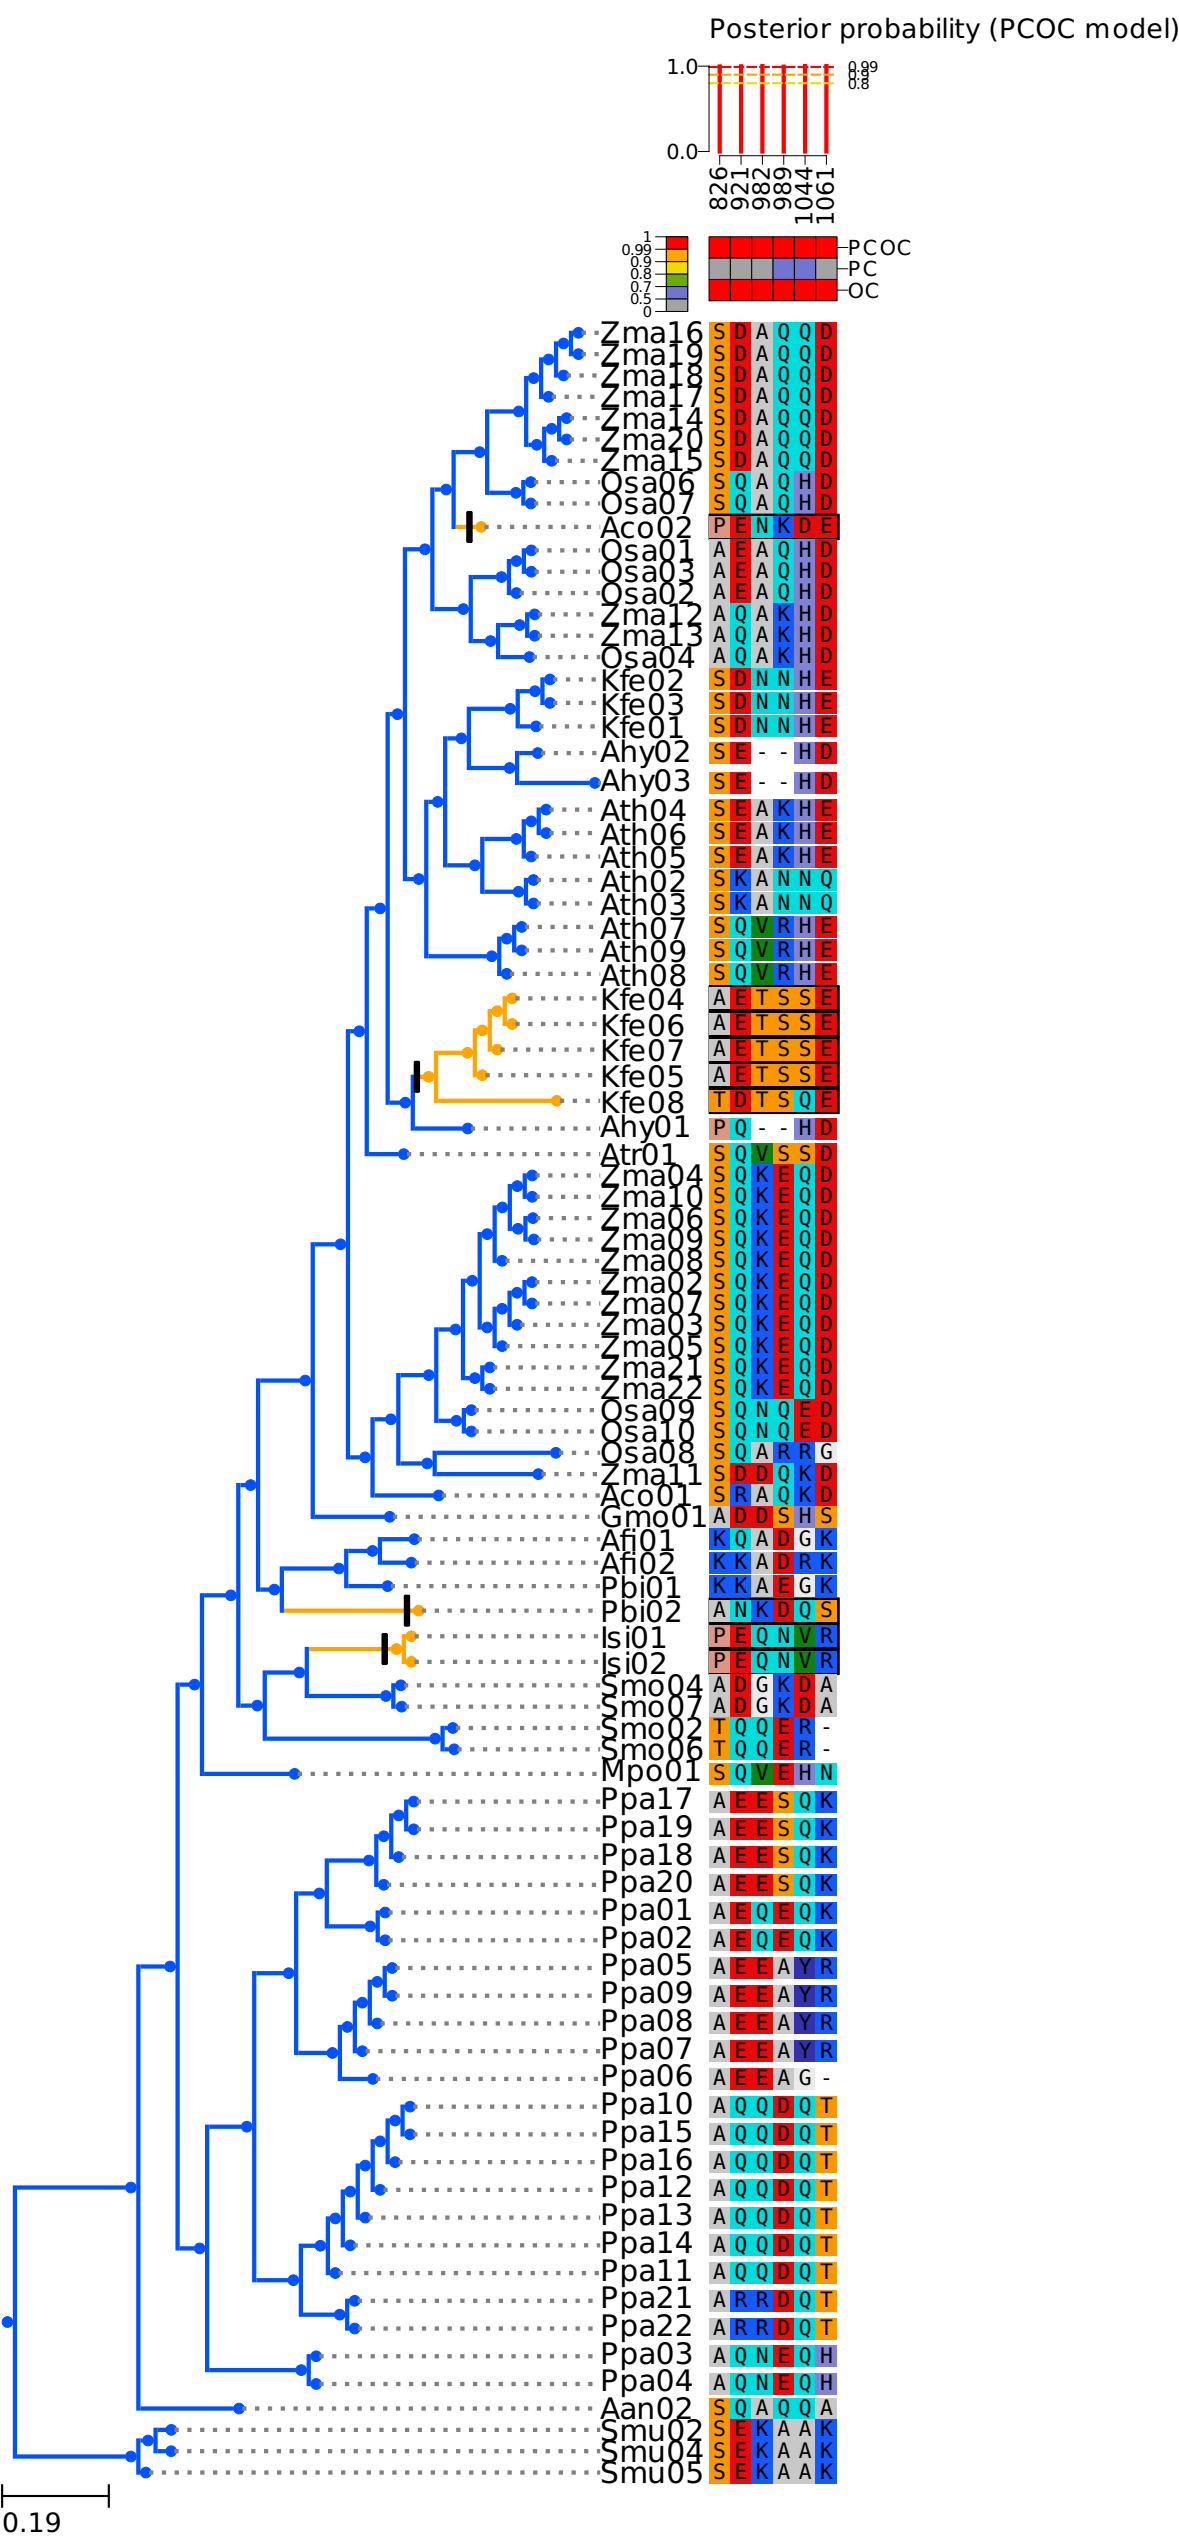

Supplement: Figure_S2.zip [file Figure_S2.zip]

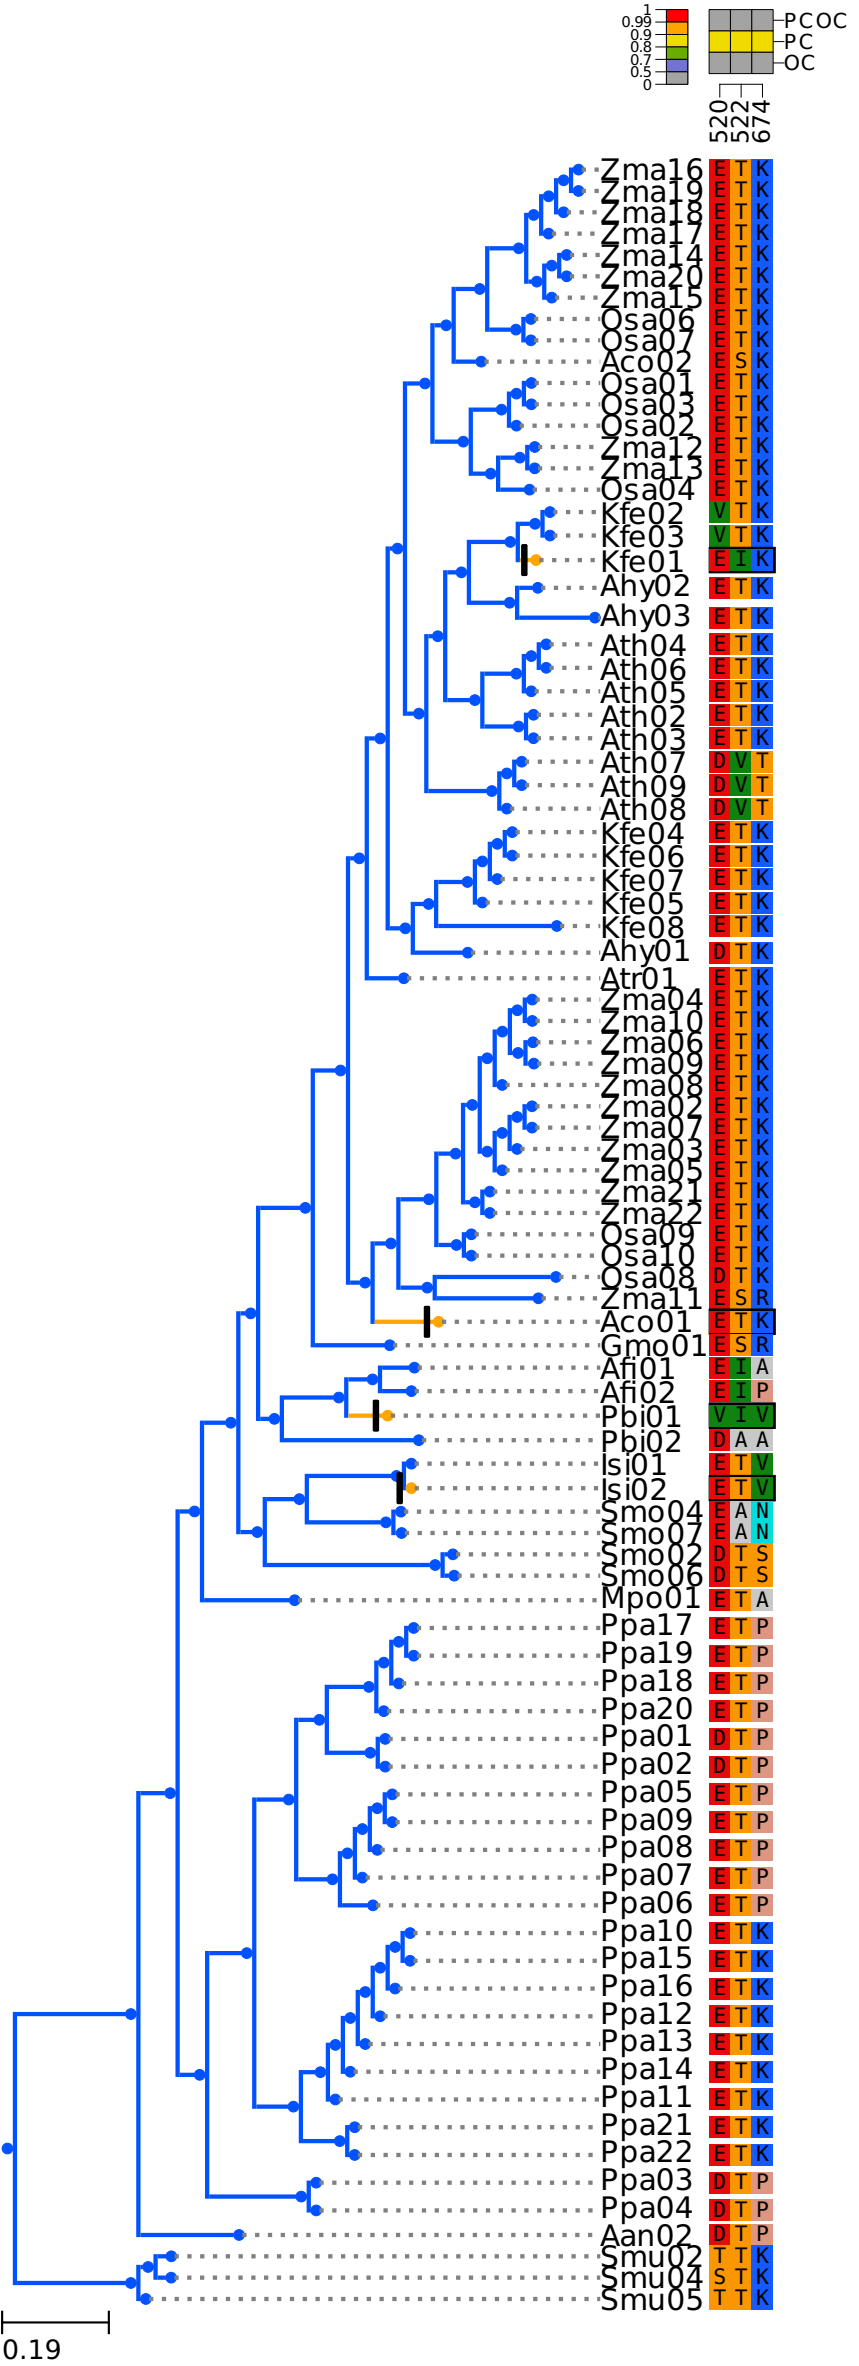

Supplement: Figure_S2.zip [file Figure_S2.zip]

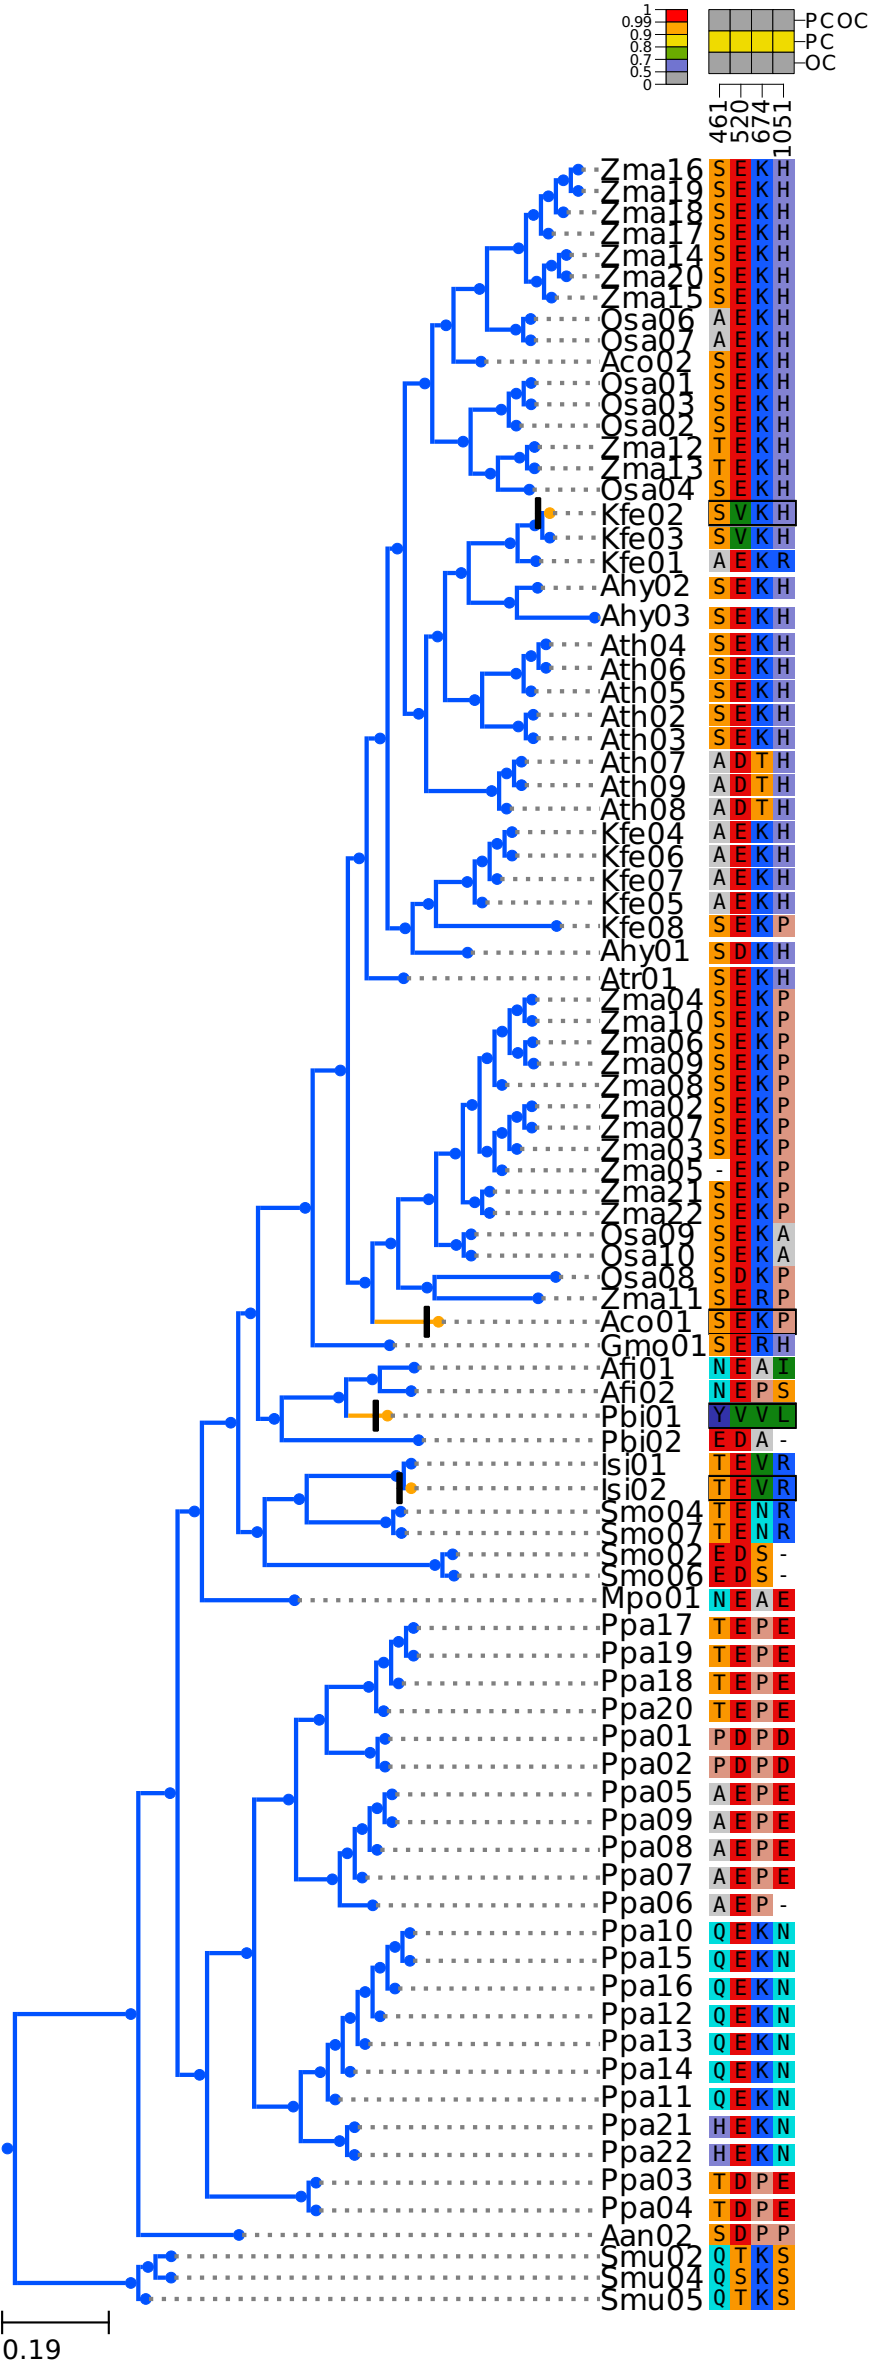

Supplement: Figure_S2.zip [file Figure_S2.zip]

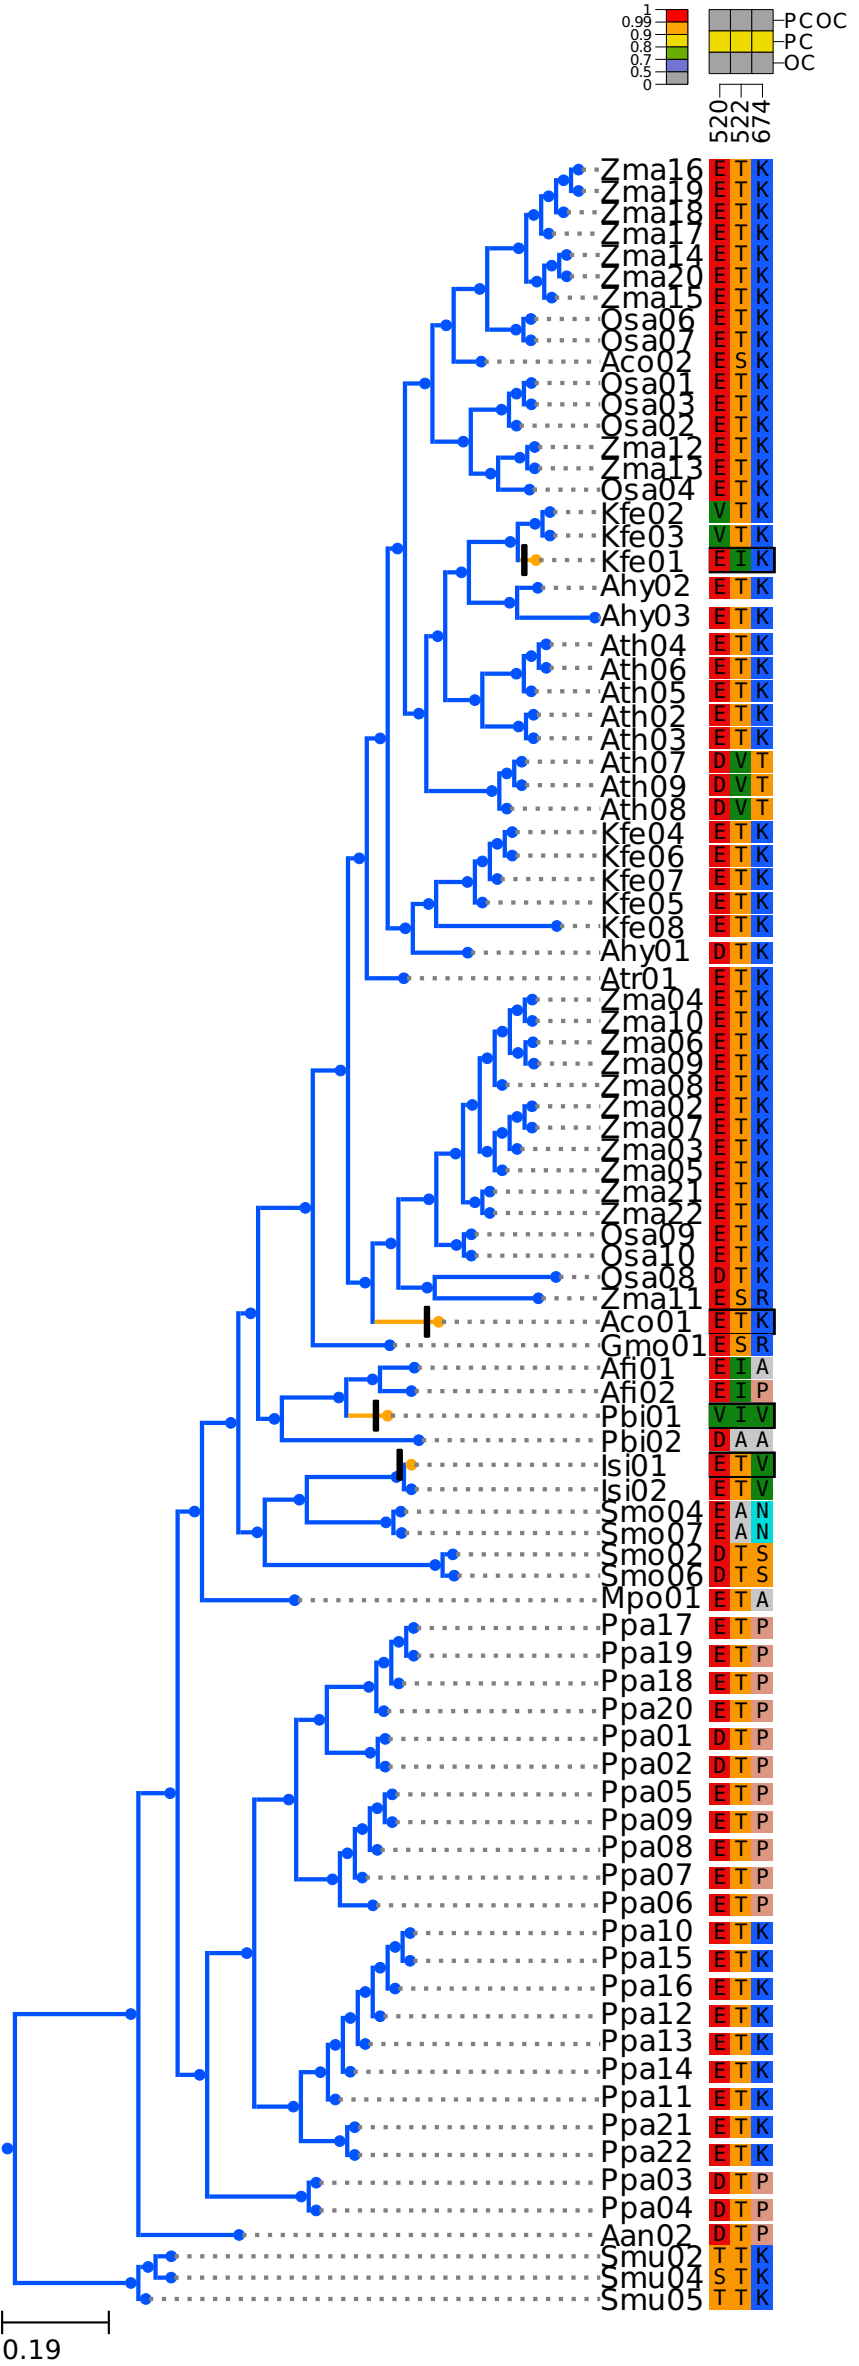

Supplement: Figure_S2.zip [file Figure_S2.zip]

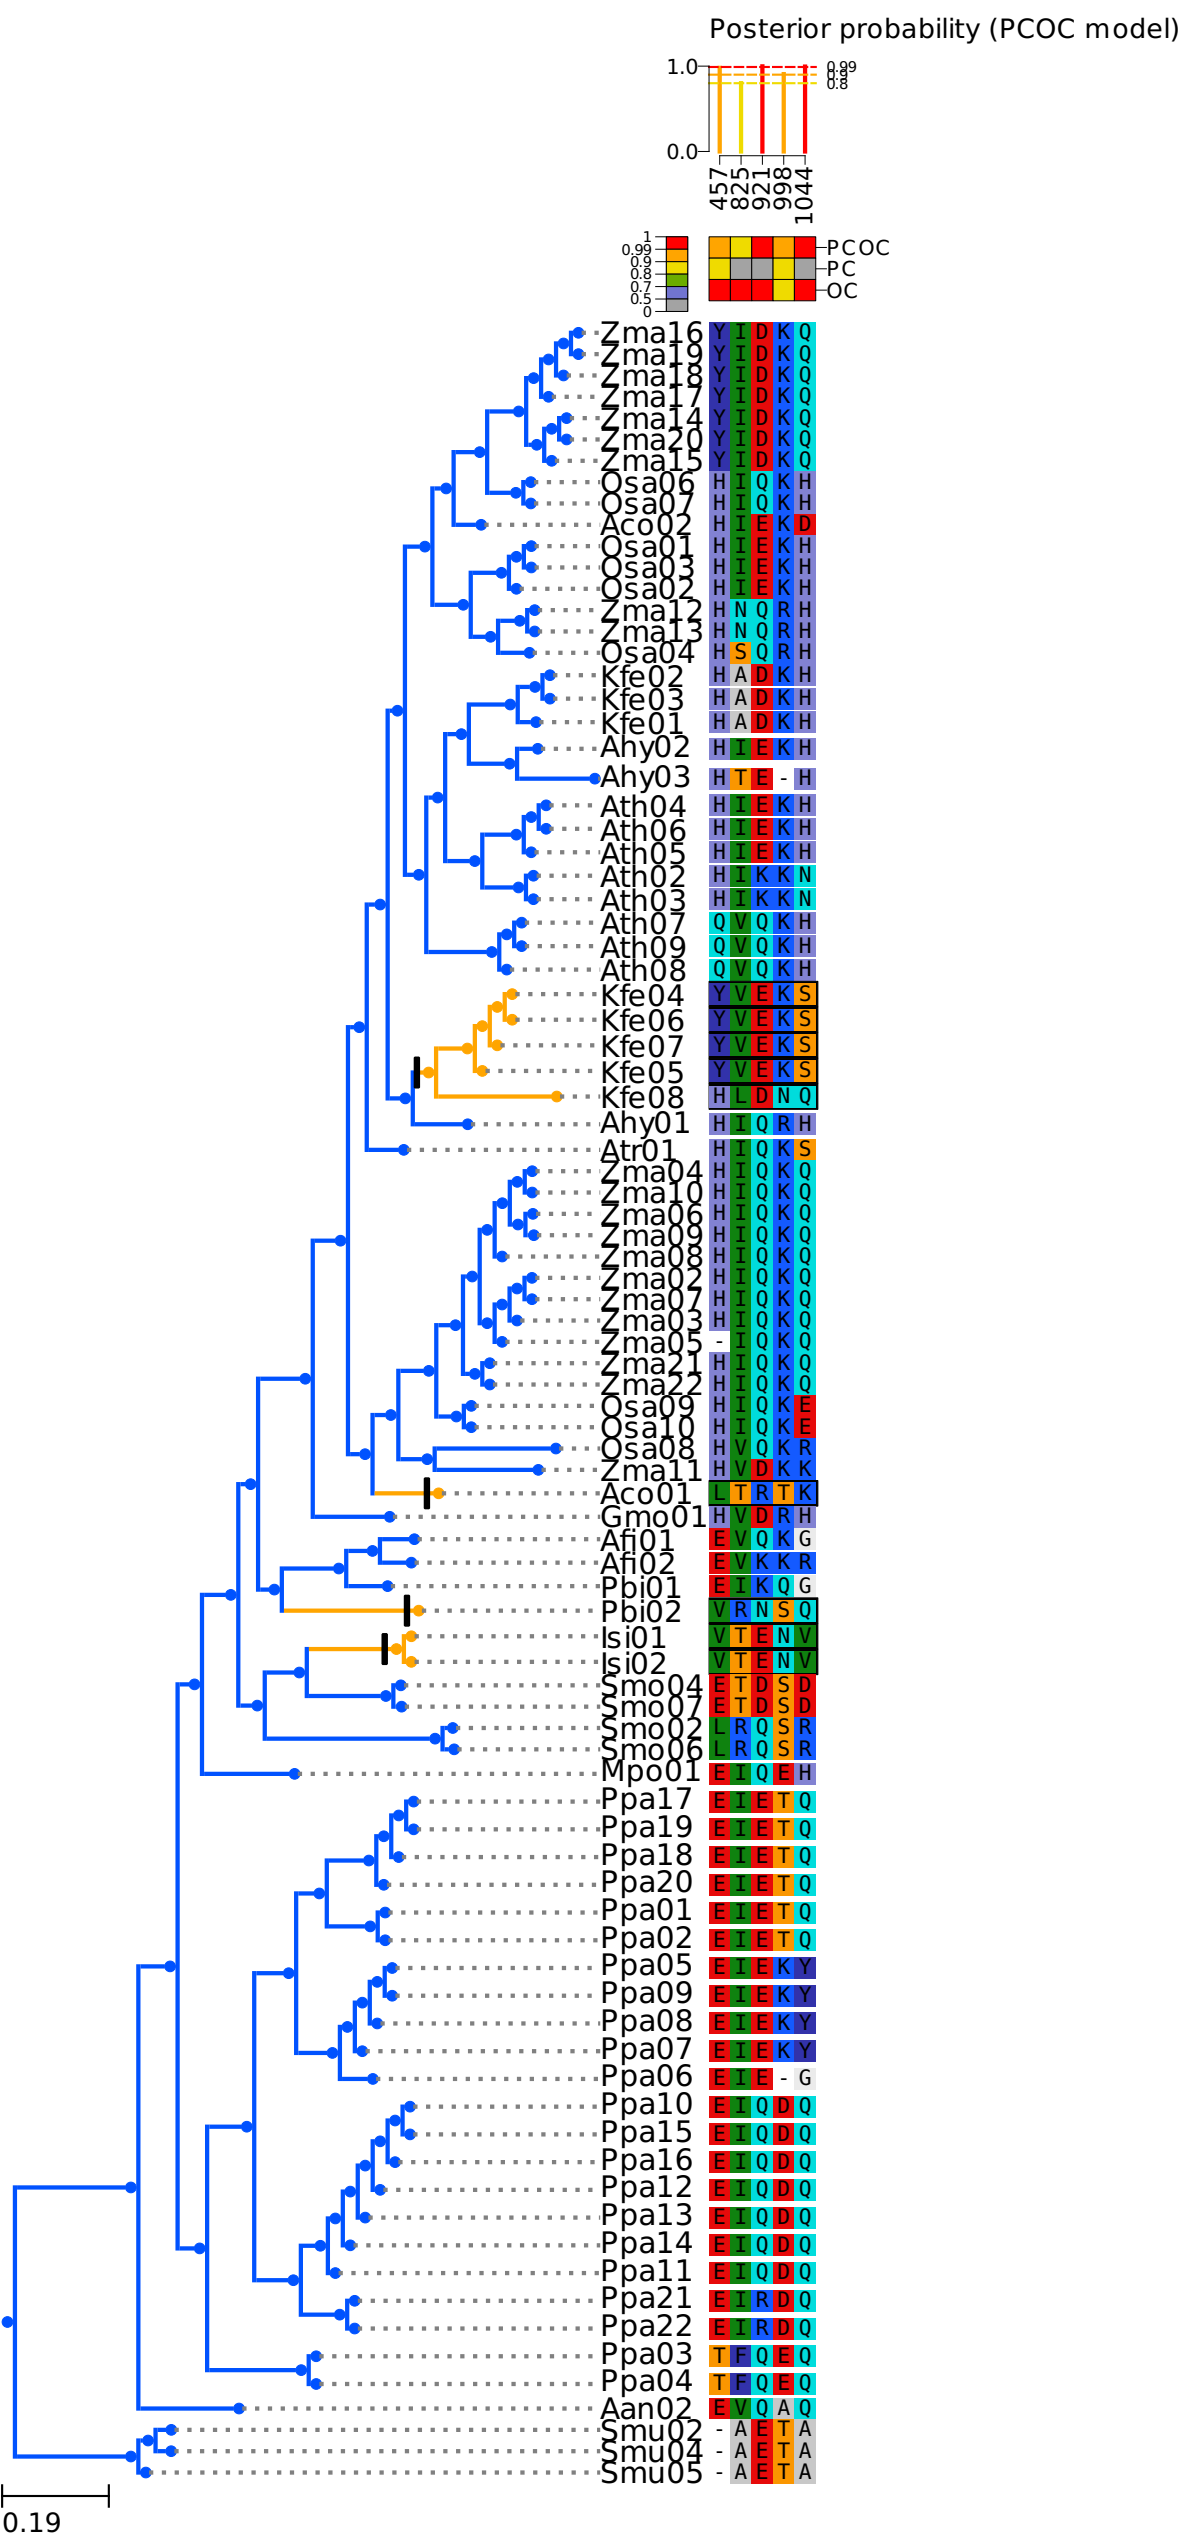

Supplement: Figure_S2.zip [file Figure_S2.zip]
